# Supplementary material
Source: PubMed Central journal article supplement (PMC8675236)
Supplement: NIHMS1655897-supplement-1.pdf [file NIHMS1655897-supplement-1.pdf]

## *Supplementary Information*

### **Abiotic reduction of ketones with silanes catalyzed by carbonic anhydrase through an enzymatic zinc hydride**

Pengfei Ji<sup>1</sup>, Jeeyoung Park<sup>1</sup>, Yang Gu<sup>1</sup>, Douglas S. Clark<sup>1,2</sup>, and John F. Hartwig<sup>1,\*</sup>

<sup>1</sup>Department of Chemistry, University of California, Berkeley, CA, 94720, USA

<sup>2</sup>Department of Chemical & Biomolecular Engineering, University of California, Berkeley, CA, 94720, USA

\*email: [jhartwig@berkeley.edu](mailto:jhartwig@berkeley.edu)

| Contents                               | Page |
|----------------------------------------|------|
| 1. Protein Expression and Purification | 2    |
| 2. DNA and Protein Sequences           | 3    |
| 3. Catalytic Reactions                 | 10   |
| 4. Preparation of Racemic Standards    | 13   |
| 5. Detection of H <sub>2</sub> and HD  | 14   |
| 6. Products and Characterizations      | 16   |
| 7. Computational Study                 | 42   |
| 8. NMR Spectra                         | 58   |
| 9. References                          | 89   |

# 1. Protein Expression and Purification

## 1.1 Methods and Materials

Unless otherwise noted, all chemicals, salts and solvents were obtained from commercial suppliers (Sigma-Aldrich, Acros, etc.) and used without further purification. All expression media and buffers were prepared with ddH<sub>2</sub>O (MilliQ A10 Advantage purification system, Millipore). Expression media was sterilized either by autoclave (45 min, 121°C) or a sterile syringe filter (0.22 µm). To maintain sterile conditions, sterile materials and *E. coli* cells were manipulated near a lit Bunsen burner.

## 1.2 Preparation of Plasmides

Plasmids encoding hCAVII (Uniprot ID P43166) and hCAXIII (UniProt ID Q8N1Q1) were purchased from Addgene. The plasmid encoding hCAII (UniProt ID P00918) was prepared by mutating 3\*His-hCAII. The procedure for preparing the 3\*His-hCAII plasmide was previously reported by our group.<sup>1</sup> To prepare the plasmid of wild-type hCAII, we perform three point mutations (R3H, R10H and F15H) step-by-step.

## 1.3 Protein Expression

Protein Expression (Unlabeled Carbonic Anhydrase): Carbonic anhydrase was over-expressed in chemically competent BL21 DE3 *E. coli* cells (UC Berkeley Macro Lab) with Terrific Broth (TB) Media. Freshly transformed cells were plated on ampicillin/LB (100mg/L) media and grown overnight at 37 °C in the oven. Single colonies were used to inoculate 3 mL LB/amp cultures, which were shaken at 37 °C at 250 rpm for 6 h. Each 3 mL culture was used to inoculate 1 L of TB media. Expressions were typically conducted in 4 × 1 L batches in baffled flasks, and the flasks were shaken at 37 °C / 250 rpm for 6 h, after which time the temperature was reduced to 28 °C. The culture was supplemented with ZnSO<sub>4</sub> (100 mg/L) and IPTG (100 mg/L) and allowed to proceed for additional 12 h. After this time, cells were recovered by centrifugation (5000 rpm, 15 minutes, 4°C). Cell pellets were frozen at -80 °C, thawed, resuspended in Ni-NTA lysis buffer (50 mM NaPi, 300 mM NaCl, 10 mM imidazole, pH 8.0), and flash frozen until purification.

## 1.4 Protein Purification

Protein Purification. Cell suspensions were thawed in a room-temperature water bath, decanted into 50 mL glass beakers, and lysed on ice by sonication (3 × 30 s on, 2 × 2 min off, 65% power). Cell debris was removed by centrifugation (10,000 rpm, 30 min, 4 °C), and Ni-NTA (5 mL, 50% suspension per 850 mL cell culture) was added. The lysates were briefly incubated with Ni-NTA (30 min, rt, 20 rpm) and poured into glass frits (coarse, 50 mL). The resin was washed with Ni-NTA lysis buffer (3 × 35 mL), and the desired protein was eluted with 18 mL Ni-NTA elution buffer (50 mM NaPi, 250 mM NaCl, 250 mM Imidazole, pH = 8.0). The eluted protein was dialyzed twice against Tris buffer (50 mM, pH = 8.0, 12 h, 4 °C). Gel electrophoreses was then preformed to monitor protein purity (Supplementary Figure 1). Protein concentration was measured with a NanoDrop UV-vis spectrophotometer at 280 nm.

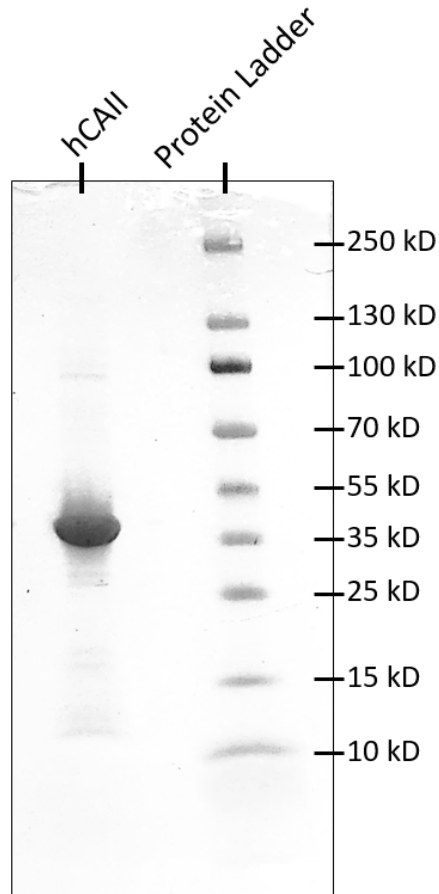

**Supplementary Figure 1.** Representative SDS-Page gel of hCAII ran at 300 V.

## 2. DNA and Protein Sequence

### 2.1 hCAII

#### DNA Sequence of hCAII

```

TTATTTGAAGGAAGCTTTGATTTGCTTCTTCAGTGGCTGAGCTGGGCGCCAGTTGTCCACCATCAGTTCTTCGG
GTTACACCTCCCCATTGAAGTTAAGTTTACGGAATTTCAACACCTGCTCGCTGCTGACGCTGATGGGTTTCCTTGAGC
ACAATCCAGGTCACACATTCCAGAAGAGGAGGGGTGGTCAGTGAAGCTGAGCCTGGGTAGGTCCAGTAATCCAGGGATTGAGG
AAGGAGGCCACGAGGATCGAAGTTAGTGAAGTCAGCACTCTTGCCCTTTGTTTTAATGGAATCCAGCACATCAACAA
CTTTCTGAAGGCCCGGTTTAGCGCTGCCAACCTTCAAAAAAATACCTAGAACGGCCAGTCCATCAGGTTGCTGCACA
GCTTTCCAAAATCCCCATATTTGGTGTTCGAATGAACCAAGTGAAGTTCTGCAGCATATTTCTTTTTATCCACAGT
ATGCTCTGAACCTTGTCCATCAAGTGAACCCAGTGAAGTGAAGTGAAGTGAAGTGAAGTGAAGTGAAGTGAAGTGAAGT
CTCCCTTGAGCACTGCTTTGTCTGAGAGTCATCAAACCTCCACGTTGAAAGCATGACCATTGTTGAGGATCCTCAGG
GAAGTTGCTTGATCATAGGAAACAGACAGGGGCTTCAGGGAAGGGTCATACTTGGCTGTGTGAGTGTTCGATGTCAAC
AGGGGACTGGCGCTCTCCCTTGCAATGGGGAAGTCCCTTATGCCAATGCTCAGGTCCGTTGTGTTTGGCGTACCCCC
AGTGATGGGACATTGCATTGGATTGGAAGTACAGTTTTTCATGGTGATGGTGATGGTGAGAAGATTTTCAT

```

#### Protein Sequence of hCAII

```

MKSSHHHHHHENLYFQSNAMSHHWGYGKHNGPEHWHKDFPIAKGERQSPVDIDTHTAKYDPSLKPLSVSYDQATSLR
ILNNGHAFNVEFDDSQDKAVLKGKGLDGTYRLIQFHFHWGSLDGQSEHTVDKKKYAAELHLVHWNTKYGDFGKAVQ
QPDGLAVLGI FLKVGSAKPLQKVVDVLDLSIKTKGKSADFTNFDPGRLLPESLDYWTPGSLTTPPLLECVTWIVLK
EPI SVSSEQVLKFRKLNFNNGEPEELMVDNWRPAQPLKNRQIKASFK*

```

## 2.2 hCAVII

### DNA Sequence of hCAVII

TCAGAAGGAGGCCTTTACCACGCGGCCCTTCAGTGGCTGTGGTGGCCGGAAGTTGTTCCACCATGTGGATCCTCTCAT  
CGTCCTCCGAGGTAAAAAGCAGGCTCCGGAACCTTCCCCATCTGCCTTTCAGAGATGCAGATGGGCTCCCGGAGCACA  
ATCCAGGTGACACTCTCACTGAGTGGGGGAGTCGTACAGAGAGCCCGGGTAGGTCCAGTAGTGCCGGCTGGCAGGCAG  
GAGGCACTTGGGGTTGAAGCAGCTGAACTGGGCTTTGGTGCCTTGAACCGGACCATGTAGAGCGCATCTGTGACAC  
GATTCATGCTGGGGTGTCTGCTCCTGTCTCCAAAAAACACCAACCACAGCCAGGCCATCAGGTGCTGAGGCCGCC  
TCCCCAAAAGTGTGTACTTCTTGGCATTCCAGTGAACCAGATGCAGCTCGCTGGGGAAGGACTTGCCGTCCACCGT  
GTGCTCAGAACCCACATCGTGTCTTCTTGGCCAGTGGAAAGTGAACTGCTTGAGGCGGTAGGGCCCTTCCAGGGGGC  
CCCCAGTCACCACGGTTCGGTCATCGCTGTCAATTGAAGTCTACCTGGACAGAGTGGCCATTGTTGGTGTGCTGAGG  
GACATGCAGGCCTCATAGGAAAGCTCCAGTGGTTCAGGCTGGGAGAGTACACAGCCTGGCTGGAGATGATATTGAT  
GGGTGATTGGCGATCTCCCTGGGCAATGGGATACAGCTTGTGCCAATGCGAGGGGCCGTGCTCCTGGCCGTAGCCCC  
AGCCGTGCATGGATTGGAAGTACAGGTTCTCGGTACCCAGATCTACACCAGAAGAATGATGATGATGATGGTGCAT

### Protein Sequence of hCAVII

MHHHHHHSSGVDLGTENLYFQSMHGWYQDDGPPSHWHKLYPIAQGDRQSPINIISSQAVYSPSLQPLELSYEACMS  
LSITNNGHSVQVDFNDSDDRTVVTTGGPLEGYPYRLKQFHFHWGKKHVDGSEHTVDGKSFPSSELHLVHWNACKYSTFGE  
AASAPDGLAVVGVFLETGDEHPSMNRLTDALYMVRFKGTAKQFSCFNPCKLLPASRHYWYTPGSLTTPPLSESVTWI  
VLREPICISERQMGKFRSLLFTSEDDERIHMVNNFRPPQPLKGRVVKASF\*

## 2.3 hCAXIII

### DNA Sequence of hCAXIII

TCAGAAAAGAGGCTCTCACTTTGCGGCCCTTTAGAGGCTGTGGTGGGCGGTGATTGCTCACCAGAAAAGCTGCTGCTT  
CACCCCTCCGCTGTGCACAGGAGACTGCGAAAATTTGGCCAGCTGTTGAGAGCTGATGTTTATAGGTTGCTTTAAAAACA  
ATCCATGTGACACTCTCAAGAAGAGGTGGAACGTAAAGAGAACCAGGATATGTCCAGTAGTCCCAGGATGGTGGAAAG  
CAGAGACAATAGGTCAAAAATTTGTGAATCGAGTTTGTTTACCCTTTTCTTTAATGGAATCCAAAGTGTGAGTAATCT  
TTTGCAGTTGGGAATTAGGTTTACCAATCTGTAAAAACACTCCCAAGACAGCCAGTCCATCTGGTTCATGAGCTGCC  
TCAACAAAAGCTGGGGTATTTGTCTGAATTCCAGTGAACAACATGGAGCTCTGCAGCATAGCTCACTCCATCTACTAT  
GTGCTCGGAGCCGTGGTCATCAGCGGACCCCCAGTGAAGGTGAACCTGCCGTAACCTGTAGCTTCCAGTGAGAGGAC  
CACCACGCAGAACTGATTTGTTCTCTGTGTCTCAAAAGTCAACATTGAAGGAATGGCCGCTGTTGCTGATGATTTTA  
GCTGAGCTTGGGTCATACTTGATACTAAGTGGTCGGAGGGAAGAGTCATATTTCACTTCTTTGGTTTTAATCTCAAT  
TGGAGATTGCTGATCACCATCAGCAATAGGGAAAAATTCCTTCCAGTGAATAGGACCGTTGTGCTCGCGGTATCCCC  
AGCTGAGCCTCGACATGGATTGGAAGTACAGGTTCTCGGTACCCAGATCTACACCAGAAGAATGATGATGATGATGG  
TGCAT

### Protein Sequence of hCAVII

MHHHHHHSSGVDLGTENLYFQSMSRLSWGYPREHNGPIHWKEFFPIADGDQQSPIEIKTKEVKYDSSLRPLSIKYDPS  
SAKIIISNSGHSFNVDFDDTENKSVLRGGPLTGSYRLRQVHLHWGSADHDGSEHIVDGVSYAAELHVVHWNNDKYPSF  
VEAAHEPDGLAVLGVFLQIGEPNSQLQKITDLDLSIKEKQKQTRFTNFDLLSLLPSSWDYWYTPGSLTVPPLLESVT  
WIVLKQPINISSQQLAKFRSLLCTAEGEAAAFLVSNHRPPQPLKGRKVRASF\*

## 2.4 DNA and Protein Sequences of 10 different mutants of hCAII

**Supplementary Table 1.** Sequence comparison for 10 different mutants of hCAII and the catalytic activity of the expressed enzyme for reducing acetophenone in whole cell. The catalyst loading for the hCAII mutants is 0.05 mol%.

| Mutants              | 121 Val | 143 Val | 198 Leu | 209 Trp | Yield (%) | ee (%) |
|----------------------|---------|---------|---------|---------|-----------|--------|
| 1                    | V       | F       | F       | W       | 0         | -      |
| 2                    | L       | L       | V       | W       | 0         | -      |
| 3                    | I       | L       | F       | K       | 0         | -      |
| 4                    | I       | F       | F       | K       | 0         | -      |
| 5                    | I       | V       | V       | W       | 1.5       | 70     |
| 6                    | V       | V       | K       | L       | 0         | -      |
| 7                    | V       | I       | I       | W       | 6.0       | 91     |
| 8                    | L       | I       | V       | W       | 0         | -      |
| 9                    | L       | V       | F       | R       | 0         | -      |
| 10                   | I       | L       | K       | W       | 0         | -      |
| wt-hCAII (0.05 mol%) | V       | V       | L       | W       | 23        | 92     |
| wt-hCAII (0.2 mol%)  | V       | V       | L       | W       | 89        | 94     |

DNA sequence of mutant 1 VFFW:

TTATTTGAAGGAAGCTTTGATTTGCCTGTTCTTCAGTGGCTGAGCTGGGCGCCAGTTGTCCACC  
ATCAGTTCTTCGGGTTACCCCTCCCCATTGAAGTTAAGTTTACGGAATTTCAACACCTGCTCGC  
TGCTGACGCTGATGGGTTCCTTGAGCACAAATCCAGGTCACACATTCCAGAAGAGGAGGGGTGGT  
AAATGAGCCTGGGTAGGTCCAGTAATCCAGGGATTCAGGAAGGAGGCCACGAGGATCGAAGTTA  
GTGAAGTCAGCACTCTTGCCCTTTGTTTTAATGGAATCCAGCACATCAACAACCTTTCTGAAGGC  
CCGTTTTAGCGCTGCCAACCTTCAAAAAAATACCTAGAAAGGCCAGTCCATCAGGTTGCTGCAC  
AGCTTTCCCAAATCCCATATTTGGTGTTC AATGAACCAAGTGAAGTTCTGCAGCATATTTCT  
TTTTTATCCACAGTATGCTCTGAACCTTGTCATCAAGTGAACCCAGTGAAAGTGAACTGAA  
TCAATCTGTAAGTGCCATCCAGGGGTCCTCCCTTGAGCACTGCTTTGTCTGAGAGTCATCAAA  
CTCCACGTTGAAAGCATGACCATTGTTGAGGATCCTCAGGGAAGTTGCTTGATCATAGGAAACA  
GACAGGGGCTTCAGGGAAGGGTCATACTTGCTGTGTGAGTGTGATGTCAACAGGGGACTGGC  
GCTCTCCCTTGGAATGGGGAAGTCCCTTATGCCAATGCTCAGGTCCGTTGTGTTTTGCCGTACCC  
CCAGTGATGGGACATTGCATTGGATTGGAAGTACAGGTTTTTCATGGTGATGGTGATGGTGAGAA  
GATTCAT

Protein sequence of mutant 1 VFFW:

MKSSHHHHHENLYFQSNAMSHHWGYGKHNGPEHWHKDFPIAKGERQSPVDIDHTAKYDPSLK  
PLSVSYDQATSLRILNNGHAFNVEFDDSQDKAVLKGGLDGTYRLIQFHFHWGSLDGQGSEHTV  
DKKKYAAELHLVHWNTKYGDFGKAVQQPDGLAFLGIFLKVGSAPGLQKVVDVLDISKTKGKSA

DFTNFDPRGLLPESLDYWTYPGSFTTTPLLECVTWIVLKEPISVSSEQVLKFRKLNFNNGEGEPE  
ELMVDNWRPAQPLKNRQIKASF\*

**DNA sequence of mutant 2 LLVW:**

TTATTTGAAGGAAGCTTTGATTTGCCTGTTCTTCAGTGGCTGAGCTGGGCGCCAGTTGTCCACC  
ATCAGTTCTTCGGGTTCCACCCTCCCCATTGAAGTTAAGTTTACGGAATTTCAACACCTGCTCGC  
TGCTGACGCTGATGGGTTCCTTGAGCACAATCCAGGTCACACATTCCAGAAGAGGAGGGGTGGT  
AACTGAGCCTGGGTAGGTCCAGTAATCCAGGGATTCAGGAAGGAGGCCACGAGGATCGAAGTTA  
GTGAAGTCAGCACTCTTGCCCTTTGTTTTAATGGAATCCAGCACATCAACAACCTTTCTGAAGGC  
CCGTTTTAGCGCTGCCAACCTTCAAAAAAATACCTAGAAAGGGCCAGTCCATCAGGTTGCTGCAC  
AGCTTTCCCAAATCCCCATATTTGGTGTTC AATGAAGCAAGTGAAGTTCTGCAGCATATTTTC  
TTTTTATCCACAGTATGCTCTGAACCTTGTCATCAAGTGAACCCAGTGAAGTGAAGTGAAGTGA  
TCAATCTGTAAGTGCCATCCAGGGGTCCTCCCTTGAGCACTGCTTTGTCCTGAGAGTCATCAAA  
CTCCACGTTGAAAGCATGACCATTGTTGAGGATCCTCAGGGAAGTTGCTTGATCATAGGAAACA  
GACAGGGGCTTCAGGGAAGGGTCATACTTGGCTGTGTGAGTGTGATGTCAACAGGGGACTGGC  
GCTCTCCCTTGGCAATGGGGAAGTCCTTATGCCAATGCTCAGGTCCGTTGTGTTTTGCCGTACCC  
CCAGTGATGGGACATTGCATTGGATTGGAAGTACAGGTTTTTCATGGTGATGGTGATGGTGAGAA  
GATTCAT

**Protein sequence of mutant 2 LLVW:**

MKSSHHHHHHENLYFQSNAMSHHWGYGKHNGPEHWHKDFPIAKGERQSPVDIDHTAKYDPSLK  
PLSVSYDQATSLRILNNGHAFNVEFDDSDKAVLKGGLDGT YRLIQFHFHWGSLDGQGSSEHTV  
DKKKYAAELHLLHWNTKYGDFGKAVQQPDGLALLGIFLKVGS AKPGLQKVVDVLDSIKTKGKSA  
DFTNFDPRGLLPESLDYWTYPGSVTTTTPLLECVTWIVLKEPISVSSEQVLKFRKLNFNNGEGEPE  
ELMVDNWRPAQPLKNRQIKASF\*

**DNA sequence of mutant 3 ILFK:**

TTATTTGAAGGAAGCTTTGATTTGCCTGTTCTTCAGTGGCTGAGCTGGGCGCCAGTTGTCCACC  
ATCAGTTCTTCGGGTTCCACCCTCCCCATTGAAGTTAAGTTTACGGAATTTCAACACCTGCTCGC  
TGCTGACGCTGATGGGTTCCTTGAGCACAATTTTGGTCACACATTCCAGAAGAGGAGGGGTGGT  
AAATGAGCCTGGGTAGGTCCAGTAATCCAGGGATTCAGGAAGGAGGCCACGAGGATCGAAGTTA  
GTGAAGTCAGCACTCTTGCCCTTTGTTTTAATGGAATCCAGCACATCAACAACCTTTCTGAAGGC  
CCGTTTTAGCGCTACCAACCTTCAAAAAAATACCTAGAAAGGGCCAGTCCATCAGGTTGCTGCAC  
AGCTTTCCCAAATCCCCATATTTGGTGTTC AATGAATCAAGTGAAGTTCTGCAGCATATTTTC  
TTTTTATCCACAGTATGCTCTGAACCTTGTCATCAAGTGAACCCAGTGAAGTGAAGTGAAGTGA  
TCAATCTGTAAGTGCCATCCAGGGGTCCTCCCTTGAGCACTGCTTTGTCCTGAGAGTCATCAAA  
CTCCACGTTGAAAGCATGACCATTGTTGAGGATCCTCAGGGAAGTTGCTTGATCATAGGAAACA  
GACAGGGGCTTCAGGGAAGGGTCATACTTGGCTGTGTGAGTGTGATGTCAACAGGGGACTGGC  
GCTCTCCCTTGGCAATGGGGAAGTCCTTATGCCAATGCTCAGGTCCGTTGTGTTTTGCCGTACCC  
CCAGTGATGGGACATTGCATTGGATTGGAAGTACAGGTTTTTCATGGTGATGGTGATGGTGAGAA  
GATTCAT

**Protein sequence of mutant 3 ILFK:**

MKSSHHHHHHENLYFQSNAMSHHWGYGKHNGPEHWHKDFPIAKGERQSPVDIDHTAKYDPSLK  
PLSVSYDQATSLRILNNGHAFNVEFDDSDKAVLKGGLDGT YRLIQFHFHWGSLDGQGSSEHTV  
DKKKYAAELHLIHWNTKYGDFGKAVQQPDGLALLGIFLKVGS AKPGLQKVVDVLDSIKTKGKSA

DFTNFDPRGLLPESLDYWTYPGSFTTPPLLECVTKIVLKEPISVSSEQVLKFRKLNFNNGEGEPE  
ELMVDNWRPAQPLKNRQIKASF\*

**DNA sequence of mutant 4 IFFK:**

TTATTTGAAGGAAGCTTTGATTTGCCTGTTCTTCAGTGGCTGAGCTGGGCGCCAGTTGTCCACC  
ATCAGTTCTTCGGGTTCCACCCTCCCCATTGAAGTTAAGTTTACGGAATTTCAACACCTGCTCGC  
TGCTGACGCTGATGGGTTCCCTTGAGCACAAATTTGGTCACACATTCCAGAAGAGGAGGGGTGGT  
AAATGAGCCTGGGTAGGTCCAGTAATCCAGGGATTCAGGAAGGAGGCCACGAGGATCGAAGTTA  
GTGAAGTCAGCACTCTTGCCCTTTGTTTTAATGGAATCCAGCACATCAACAACCTTTCTGAAGGC  
CCGTTTTAGCGCTGCCAACCTTCAAAAAAATACCTAGAAAGGCCAGTCCATCAGGTTGCTGCAC  
AGCTTTCCCAAATCCCCATATTTGGTGTTCATGAATCAAGTGAAGTTCTGCAGCATATTTTC  
TTTTTATCCACAGTATGCTCTGAACCTTGTCATCAAGTGAACCCAGTGAAGTGAAGTGAAGTGA  
TCAATCTGTAAGTGCCATCCAGGGGTCCTCCCTTGAGCACTGCTTTGTCCTGAGAGTCATCAAA  
CTCCACGTTGAAAGCATGACCATTGTTGAGGATCCTCAGGGAAGTTGCTTGATCATAGGAAACA  
GACAGGGGCTTCAGGGAAGGGTCATACTTGGCTGTGTGAGTGTGATGTCAACAGGGGACTGGC  
GCTCTCCCTTGGCAATGGGGAAGTCCTTATGCCAATGCTCAGGTCCGTTGTGTTTTGCCGTACCC  
CCAGTGATGGGACATTGCATTGGATTGGAAGTACAGGTTTTTCATGGTGATGGTGATGGTGAGAA  
GATTCAT

**Protein sequence of mutant 4 IFFK:**

MKSSHHHHHHENLYFQSNAMSHHWGYGKHNGPEHWHKDFPIAKGERQSPVDIDHTAKYDPSLK  
PLSVSYDQATSLRILNNGHAFNVEFDDSDKAVLKGGLDGTYRLIQFHFHWGSLDGQSEHTV  
DKKKYAAELHLIHWNTRYGDFGKAVQQPDGLAFLGIFLKVGSAPGLQKVVDVLDISKTKGKSA  
DFTNFDPRGLLPESLDYWTYPGSFTTPPLLECVTKIVLKEPISVSSEQVLKFRKLNFNNGEGEPE  
ELMVDNWRPAQPLKNRQIKASF\*

**DNA sequence of mutant 5 IVVW:**

TTATTTGAAGGAAGCTTTGATTTGCCTGTTCTTCAGTGGCTGAGCTGGGCGCCAGTTGTCCACC  
ATCAGTTCTTCGGGTTCCACCCTCCCCATTGAAGTTAAGTTTACGGAATTTCAACACCTGCTCGC  
TGCTGACGCTGATGGGTTCCCTTGAGCACAAATCCAGGTCACACATTCCAGAAGAGGAGGGGTGGT  
AACTGAGCCTGGGTAGGTCCAGTAATCCAGGGATTCAGGAAGGAGGCCACGAGGATCGAAGTTA  
GTGAAGTCAGCACTCTTGCCCTTTGTTTTAATGGAATCCAGCACATCAACAACCTTTCTGAAGGC  
CCGTTTTAGCGCTGCCAACCTTCAAAAAAATACCTAGAACGGCCAGTCCATCAGGTTGCTGCAC  
AGCTTTCCCAAATCCCCATATTTGGTGTTCATGAATCAAGTGAAGTTCTGCAGCATATTTTC  
TTTTTATCCACAGTATGCTCTGAACCTTGTCATCAAGTGAACCCAGTGAAGTGAAGTGAAGTGA  
TCAATCTGTAAGTGCCATCCAGGGGTCCTCCCTTGAGCACTGCTTTGTCCTGAGAGTCATCAAA  
CTCCACGTTGAAAGCATGACCATTGTTGAGGATCCTCAGGGAAGTTGCTTGATCATAGGAAACA  
GACAGGGGCTTCAGGGAAGGGTCATACTTGGCTGTGTGAGTGTGATGTCAACAGGGGACTGGC  
GCTCTCCCTTGGCAATGGGGAAGTCCTTATGCCAATGCTCAGGTCCGTTGTGTTTTGCCGTACCC  
CCAGTGATGGGACATTGCATTGGATTGGAAGTACAGGTTTTTCATGGTGATGGTGATGGTGAGAA  
GATTCAT

**Protein sequence of mutant 5 IVVW:**

MKSSHHHHHHENLYFQSNAMSHHWGYGKHNGPEHWHKDFPIAKGERQSPVDIDHTAKYDPSLK  
PLSVSYDQATSLRILNNGHAFNVEFDDSDKAVLKGGLDGTYRLIQFHFHWGSLDGQSEHTV  
DKKKYAAELHLIHWNTRYGDFGKAVQQPDGLAVLGI FLKVGSAPGLQKVVDVLDISKTKGKSA

DFTNFDPRGLLPESLDYWTYPGSVTTPLLECVTWIVLKEPISVSSEQVLKFRKLNFNNGEGEPE  
ELMVDNWRPAQPLKNRQIKASFK\*

**DNA sequence of mutant 6 VVKL:**

TTATTTGAAGGAAGCTTTGATTTGCCTGTTCTTCAGTGGCTGAGCTGGGCGCCAGTTGTCCACC  
ATCAGTTCTTCGGGTTCCACCCTCCCCATTGAAGTTAAGTTTACGGAATTTCAACACCTGCTCGC  
TGCTGACGCTGATGGGTTCCCTTGAGCACAATAAGGGTCACACATTCCAGAAGAGGAGGGGTGGT  
TTTTGAGCCTGGGTAGGTCCAGTAATCCAGGGATTTCAGGAAGGAGGCCACGAGGATCGAAGTTA  
GTGAAGTCAGCACTCTTGCCCTTTGTTTTAATGGAATCCAGCACATCAACAACCTTTCTGAAGGC  
CCGTTTTAGCGCTGCCAACCTTCAAAAAAATACTAGAACGGCCAGTCCATCAGGTTGCTGCAC  
AGCTTTCCCAAATCCCCATATTTGGTGTTCGAATGAACCAAGTGAAGTTCTGCAGCATATTTTC  
TTTTTATCCACAGTATGCTCTGAACCTTGTCCATCAAGTGAACCCAGTGAAAGTGAAACTGAA  
TCAATCTGTAAGTGCCATCCAGGGGTCCTCCCTTGAGCACTGCTTTGTCCTGAGAGTCATCAAA  
CTCCACGTTGAAAGCATGACCATTGTTGAGGATCCTCAGGGAAGTTGCTTGATCATAGGAAACA  
GACAGGGGCTTCAGGGAAGGGTCATACTTGGCTGTGTGAGTGTGATGTCAACAGGGGACTGGC  
GCTCTCCCTTGGCAATGGGGAAGTCCTTATGCCAATGCTCAGGTCGTTGTGTTTTGCCGTACCC  
CCAGTGATGGGACATTGCATTGGATTGGAAGTACAGGTTTTTCATGGTGATGGTGATGGTGAGAA  
GATTCAT

**Protein sequence of mutant 6 VVKL:**

MKSSHHHHHHENLYFQSNAMSHHWGYGKHNGPEHWHKDFPIAKGERQSPVDIDHTAKYDPSLK  
PLSVSYDQATSLRILNNGHAFNVEFDDSDKAVLKGGLDGTYRLIQHFHWGSLDGQGSEHTV  
DKKKYAAELHLVHWNTKYGDFGKAVQQPDGLAVLGI FLKVGSAKPGLQKVVDVLDSIKTKGKSA  
DFTNFDPRGLLPESLDYWTYPGSKTTPLLECVTLIVLKEPISVSSEQVLKFRKLNFNNGEGEPE  
ELMVDNWRPAQPLKNRQIKASFK\*

**DNA sequence of mutant 7 VIIW:**

TTATTTGAAGGAAGCTTTGATTTGCCTGTTCTTCAGTGGCTGAGCTGGGCGCCAGTTGTCCACC  
ATCAGTTCTTCGGGTTCCACCCTCCCCATTGAAGTTAAGTTTACGGAATTTCAACACCTGCTCGC  
TGCTGACGCTGATGGGTTCCCTTGAGCACAATCCAGGTCACACATTCCAGAAGAGGAGGGGTGGT  
AATTGAGCCTGGGTAGGTCCAGTAATCCAGGGATTTCAGGAAGGAGGCCACGAGGATCGAAGTTA  
GTGAAGTCAGCACTCTTGCCCTTTGTTTTAATGGAATCCAGCACATCAACAACCTTTCTGAAGGC  
CCGTTTTAGCGCTGCCAACCTTCAAAAAAATACTAGAAATGGCCAGTCCATCAGGTTGCTGCAC  
AGCTTTCCCAAATCCCCATATTTGGTGTTCGAATGAACCAAGTGAAGTTCTGCAGCATATTTTC  
TTTTTATCCACAGTATGCTCTGAACCTTGTCCATCAAGTGAACCCAGTGAAAGTGAAACTGAA  
TCAATCTGTAAGTGCCATCCAGGGGTCCTCCCTTGAGCACTGCTTTGTCCTGAGAGTCATCAAA  
CTCCACGTTGAAAGCATGACCATTGTTGAGGATCCTCAGGGAAGTTGCTTGATCATAGGAAACA  
GACAGGGGCTTCAGGGAAGGGTCATACTTGGCTGTGTGAGTGTGATGTCAACAGGGGACTGGC  
GCTCTCCCTTGGCAATGGGGAAGTCCTTATGCCAATGCTCAGGTCGTTGTGTTTTGCCGTACCC  
CCAGTGATGGGACATTGCATTGGATTGGAAGTACAGGTTTTTCATGGTGATGGTGATGGTGAGAA  
GATTCAT

**Protein sequence of mutant 7 VIIW:**

MKSSHHHHHHENLYFQSNAMSHHWGYGKHNGPEHWHKDFPIAKGERQSPVDIDHTAKYDPSLK  
PLSVSYDQATSLRILNNGHAFNVEFDDSDKAVLKGGLDGTYRLIQHFHWGSLDGQGSEHTV  
DKKKYAAELHLVHWNTKYGDFGKAVQQPDGLAILGI FLKVGSAKPGLQKVVDVLDSIKTKGKSA



DFTNFDPRGLLPESLDYWTYPGSITTPPLLECVTWIVLKEPISVSSEQVLKFRKLNFNNGEGEPE  
ELMVDNWRPAQPLKNRQIKASF\*

**DNA sequence of mutant 8 LIVW:**

TTATTTGAAGGAAGCTTTGATTTGCCTGTTCTTCAGTGGCTGAGCTGGGCGCCAGTTGTCCACC  
ATCAGTTCTTCGGGTTCCACCCTCCCCATTGAAGTTAAGTTTACGGAATTTCAACACCTGCTCGC  
TGCTGACGCTGATGGGTTCCCTTGAGCACAAATCCAGGTCACACATTCCAGAAGAGGAGGGGTGGT  
AACTGAGCCTGGGTAGGTCCAGTAATCCAGGGATTTCAGGAAGGAGGCCACGAGGATCGAAGTTA  
GTGAAGTCAGCACTCTTGCCCTTTGTTTTAATGGAATCCAGCACATCAACAACCTTTCTGAAGGC  
CCGGTTTAGCGCTGCCAACCTTCAAAAAAATACCTAGAATGGCCAGTCCATCAGGTTGCTGCAC  
AGCTTTCCCAAATCCCCATATTTGGTGTTCATGAAGCAAGTGAAGTTCTGCAGCATATTTTC  
TTTTTATCCACAGTATGCTCTGAACCTTGTCATCAAGTGAACCCAGTGAAGTGAAGTGAAGTGA  
TCAATCTGTAAGTGCCATCCAGGGGTCCTCCCTTGAGCACTGCTTTGTCCTGAGAGTCATCAAA  
CTCCACGTTGAAAGCATGACCATTGTTGAGGATCCTCAGGGAAGTTGCTTGATCATAGGAAACA  
GACAGGGGCTTCAGGGAAGGGTCATACTTGGCTGTGTGAGTGTGATGTCAACAGGGGACTGGC  
GCTCTCCCTTGGCAATGGGGAAGTCCTTATGCCAATGCTCAGGTCCGTTGTGTTTTGCCGTACCC  
CCAGTGATGGGACATTGCATTGGATTGGAAGTACAGGTTTTTCATGGTGTGATGGTGTGAGAA  
GATTCAT

**Protein sequence of mutant 8 LIVW:**

MKSSHHHHHHENLYFQSNAMSHHWGYGKHNGPEHWHKDFPIAKGERQSPVDIDHTAKYDPSLK  
PLSVSYDQATSLRILNNGHAFNVEFDDSDKAVLKGGLDGTYRLIQFHFHWGSLDGQSEHTV  
DKKKYAAELHLLHWNTKYGDFGKAVQQPDGLAILGIFLKVGSAPGLQKVVDVLDSIKTKGKSA  
DFTNFDPRGLLPESLDYWTYPGSVTTTPPLLECVTWIVLKEPISVSSEQVLKFRKLNFNNGEGEPE  
ELMVDNWRPAQPLKNRQIKASF\*

**DNA sequence of mutant 9 LVFR:**

TTATTTGAAGGAAGCTTTGATTTGCCTGTTCTTCAGTGGCTGAGCTGGGCGCCAGTTGTCCACC  
ATCAGTTCTTCGGGTTCCACCCTCCCCATTGAAGTTAAGTTTACGGAATTTCAACACCTGCTCGC  
TGCTGACGCTGATGGGTTCCCTTGAGCACAAATCCAGGTCACACATTCCAGAAGAGGAGGGGTGGT  
AAATGAGCCTGGGTAGGTCCAGTAATCCAGGGATTTCAGGAAGGAGGCCACGAGGATCGAAGTTA  
GTGAAGTCAGCACTCTTGCCCTTTGTTTTAATGGAATCCAGCACATCAACAACCTTTCTGAAGGC  
CCGGTTTAGCGCTGCCAACCTTCAAAAAAATACCTAGAACGGCCAGTCCATCAGGTTGCTGCAC  
AGCTTTCCCAAATCCCCATATTTGGTGTTCATGAAGCAAGTGAAGTTCTGCAGCATATTTTC  
TTTTTATCCACAGTATGCTCTGAACCTTGTCATCAAGTGAACCCAGTGAAGTGAAGTGAAGTGA  
TCAATCTGTAAGTGCCATCCAGGGGTCCTCCCTTGAGCACTGCTTTGTCCTGAGAGTCATCAAA  
CTCCACGTTGAAAGCATGACCATTGTTGAGGATCCTCAGGGAAGTTGCTTGATCATAGGAAACA  
GACAGGGGCTTCAGGGAAGGGTCATACTTGGCTGTGTGAGTGTGATGTCAACAGGNGACTGGC  
GCTCTCCCTTGGCAATGGGGAAGTCCTTATGCCAATGCTCAGGTCCGTTGTGTTTTGCCGTACCC  
CCAGTGATGGGACATTGCATTGGATTGGAAGTACAGGTTTTTCATGGTGTGATGGTGTGAGAA  
GATTCAT

**Protein sequence of mutant 9 LVFR:**

MKSSHHHHHHENLYFQSNAMSHHWGYGKHNGPEHWHKDFPIAKGERQSPVDIDHTAKYDPSLK  
PLSVSYDQATSLRILNNGHAFNVEFDDSDKAVLKGGLDGTYRLIQFHFHWGSLDGQSEHTV  
DKKKYAAELHLLHWNTKYGDFGKAVQQPDGLAVLGI FLKVGSAPGLQKVVDVLDSIKTKGKSA

DFTNFDPRGLLPESLDYWTYPGSFTTPPLLECVTRIVLKEPISVSSEQVLKFRKLNFNNGEGEPE  
ELMVDNWRPAQPLKNRQIKASFK\*

#### DNA sequence of mutant 10 ILKW:

TTATTTGAAGGAAGCTTTGATTTGCCTGTTCTTCAGTGGCTGAGCTGGGCGCCAGTTGTCCACC  
ATCAGTTCTTCGGGTTCCACCCTCCCCATTGAAGTTAAGTTTACGGAATTTCAACACCTGCTCGC  
TGCTGACGCTGATGGGTTCCCTTGAGCACAATCCAGGTCACACATTCCAGAAGAGGAGGGGTGGT  
TTTTGAGCCTGGGTAGGTCCAGTAATCCAGGGATTTCAGGAAGGAGGCCACGAGGATCGAAGTTA  
GTGAAGTCAGCACTCTTGCCCTTTGTTTTAATGGAATCCAGCACATCAACAACCTTTCTGAAGGC  
CCGGTTTACGCTGCCAACCTTCAAAAAAATACCTAGAAGGGCCAGTCCATCAGGTTGCTGCAC  
AGCTTTCCCAAATCCCCATATTTGGTGTTCATGAATCAAGTGAAGTTCTGCAGCATATTTTC  
TTTTTATCCACAGTATGCTCTGAACCTTGTCATCAAGTGAACCCAGTGAAGTGAAGTGAAGTGA  
TCAATCTGTAAGTGCCATCCAGGGGTCCTCCCTTGAGCACTGCTTTGTCCTGAGAGTCATCAAA  
CTCCACGTTGAAAGCATGACCATTGTTGAGGATCCTCAGGGAAGTTGCTTGATCATAGGAAACA  
GACAGGGGCTTCAGGGAAGGGTCATACTTGGCTGTGTGAGTGTGATGTCAACAGGGGACTGGC  
GCTCTCCCTTGGCAATGGGGAAGTCTTATGCCAATGCTCAGGTCCGTTGTGTTTTGCCGTACCC  
CCAGTGATGGGACATTGCATTGGATTGGAAGTACAGGTTTTTCATGGTGATGGTGATGGTGAGAA  
GATTCAT

#### Protein sequence of mutant 10 ILKW:

MKSSHHHHHHENLYFQSNAMSHHWGYGKHNGPEHWHKDFPIAKGERQSPVDIDHTAKYDPSLK  
PLSVSYDQATSLRILNNGHAFNVEFDDSDKAVLKGGLDGTYRLIQFHFHWGSLDGQGSEHTV  
DKKKYAAELHLIHWNTKYGDFGKAVQQPDGLALLGIFLKVGSAPGLQKVVDVLDISKTKGKSA  
DFTNFDPRGLLPESLDYWTYPGSKTTPPLLECVTWIVLKEPISVSSEQVLKFRKLNFNNGEGEPE  
ELMVDNWRPAQPLKNRQIKASFK\*

### 3. Catalytic Reactions

#### 3.1 General Method

All enzyme-catalyzed reactions were performed at room temperature (23 °C) on an orbital shaker at the rate of 300 rpm. Unless otherwise noted, catalytic reactions were performed in 20 mL scintillation vials. The vials were loosely capped during catalytic reactions to avoid pressure accumulation due to the evolution of hydrogen. Protein catalysts were diluted to reaction concentrations in Tris buffer (50 mM, pH = 8.0) before adding to the reaction vials. To purify the reaction product, silica gel chromatography was conducted with AMD Silica Gel 60, 230-400 mesh. <sup>1</sup>H NMR spectra and <sup>19</sup>F NMR spectra were recorded on the Bruker AVB-400 instrument with <sup>1</sup>H operating frequencies of 400 MHz and <sup>19</sup>F operating frequency of 376 MHz. Chemical shifts (δ) are reported in ppm, relative to the residual solvent signal (CDCl<sub>3</sub>: 7.26 ppm for <sup>1</sup>H NMR).

#### 3.2 Procedure for typical catalytic experiments

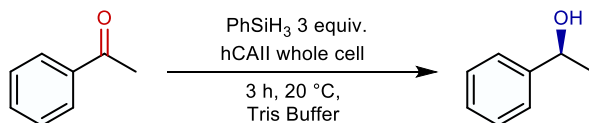

#### Catalysis with purified enzyme:

The 0.1 mM solution of hCAII in Tris Buffer (50 mM, pH 8.0) was stored at -80 °C, and warmed to room temperature before catalytic reactions. To a 20 mL scintillation vial was added 1 mL of the catalyst stock solution (0.1  $\mu\text{mol}$  of hCAII), followed by phenylsilane (18  $\mu\text{L}$ , 150  $\mu\text{mol}$ ), ketone (50  $\mu\text{mol}$ ) and 2 mL of Tris buffer (50 mM, pH = 8.0). The vial was capped and incubated on an orbital shaker (20 °C, 300 rpm) for 3 h. Upon completion, the reaction mixture was extracted with 5 mL EtOAc and evaporated under vacuum. The chiral alcohol products were dissolved in  $\text{CDCl}_3$ , mesitylene was added as the internal standard, and the reaction yields were measured by  $^1\text{H}$  NMR spectroscopy. The products were purified by silica column chromatography eluting with EtOAc/hexane (2%-20%), and e.e.'s were determined by supercritical fluid chromatography (SFC) or high performance liquid chromatography (HPLC).

### Catalysis with lyophilized cell powder:

The amount of hCAII in lyophilized cell powder was determined by first purifying the enzyme with Ni-NTA resin, followed by measurement of protein concentration with NanoDrop UV-Vis spectrophotometer (see section 1.3 for details). The amount of hCAII was quantified to be 19 mg per 100 mg of lyophilized cell powder.

To a 20 mL scintillation vial containing 3 mL of Tris buffer (50 mM, pH = 8.0) was added 15 mg of the lyophilized cell powder (containing 0.1  $\mu\text{mol}$  of hCAII), followed by phenylsilane (18  $\mu\text{L}$ , 150  $\mu\text{mol}$ ) and ketone (50  $\mu\text{mol}$ ). The vial was capped, vortexed briefly, and incubated on an orbital shaker (20 °C, 300 rpm) for 3 h. Upon completion, the reaction mixture was extracted with EtOAc, and the chiral alcohol product was measured by  $^1\text{H}$  NMR spectroscopy for yields and SFC or HPLC for e.e. values.

### 3.3 Procedure for gram-scale reaction

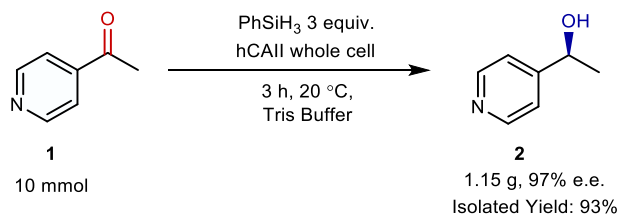

To a 1 L Erlenmeyer flask containing 500 mL of Tris buffer (50 mM, pH = 8.0) was added 1.2 g of the lyophilized cell powder (containing 8  $\mu\text{mol}$  of hCAII), followed by phenylsilane (3.6 mL, 30 mmol) and ketone (1.1 mL, 10 mmol). The reaction mixture was vigorously stirred on a stir plate (20 °C, 600 rpm) for 3 h. Upon completion, the reaction mixture was monitored by  $^1\text{H}$  NMR spectroscopy to measure the conversion of ketone. The mixture was extracted with EtOAc three times (1.5 L), washed with water three times (1.5 L), and then dried with  $\text{Na}_2\text{SO}_4$ . Upon evaporation to dryness, the chiral alcohol product was obtained in 93% isolated yield (1.15 g) as a white solid without further purification. The configuration and enantiomeric excess of the product was analyzed by SFC to be mainly the S-enantiomer in 97% e.e.

## 4 Preparation of Racemic Standards

### 4.1 Procedure for typical synthesis of racemic alcohol

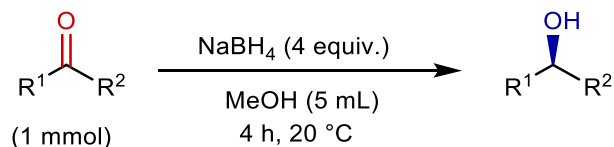

The ketone (1 mmol) was dissolved in 4 mL of methanol, cooled to 0 °C in ice, and NaBH<sub>4</sub> (4 mmol, 152 mg) was added with stirring. The mixture was stirred at room temperature for 3 h, then 20 mL of water was added to the reaction mixture to quench the excess NaBH<sub>4</sub>. The mixture was extracted with 30 mL of EtOAc and dried with Na<sub>2</sub>SO<sub>4</sub>. The alcohol product was obtained by evaporation of EtOAc and was purified by silica column chromatography eluting with hexane/EtOAc. All compounds were obtained in high chemical yields and purity, as determined by <sup>1</sup>H NMR spectroscopy.

### 4.2 Synthesis of racemic 3-hydroxy-1-phenylbutan-1-one

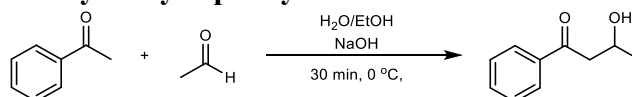

The racemic sample of 3-hydroxy-1-phenylbutan-1-one was synthesized following a modified literature procedure.<sup>2</sup> To a solution of NaOH (0.184 g, 4.6 mmol) in water (1 mL) and EtOH (2 mL), acetophenone (0.49 mL, 4.16 mmol) and acetaldehyde (0.3 mL, 5.3 mmol) were sequentially added. After stirring for 15 min, a saturated aqueous solution of NH<sub>4</sub>Cl (5 mL) was added, and the solution was extracted with EtOAc. (3 × 15 mL). The residue was purified by silica gel column chromatography eluting with 30% EtOAc in hexane. 3-hydroxy-1-phenylbutan-1-one was obtained in 60% yield as a colorless oil.

<sup>1</sup>H NMR (400 MHz, CDCl<sub>3</sub>) δ 8.01 (dt, *J* = 8.5, 1.1 Hz, 2H), 7.73 – 7.63 (m, 1H), 7.58 – 7.47 (m, 2H), 4.46 (dq, *J* = 9.3, 6.3, 3.1 Hz, 1H), 3.37 (d, *J* = 3.1 Hz, 1H), 3.23 (ddd, *J* = 17.7, 2.8, 1.0 Hz, 1H), 3.09 (dd, *J* = 17.8, 9.0 Hz, 1H), 1.35 (d, *J* = 6.4 Hz, 3H).

### 4.3 Synthesis of racemic 2-hydroxy-1-phenylpropan-1-one

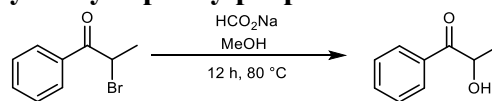

The racemic sample of 2-hydroxy-1-phenylpropan-1-one was synthesized following a modified literature procedure.<sup>3</sup> To a solution of 2-bromopropiophenone (3.5 g, 16.4 mmol) in MeOH (20 mL) was added sodium formate (4.4 g, 64.8 mmol). After the mixture was refluxed for 12 h, the solvent was evaporated. The residue was extracted with EtOAc, and the resulting solution was washed with water and brine. After drying the solution with anhydrous MgSO<sub>4</sub>, filtration and evaporation, the crude product was purified by silica gel column chromatography eluting with 10% EtOAc in hexane to give 2-hydroxy-1-phenylpropan-1-one in 90% yield as a colorless oil.

<sup>1</sup>H NMR (400 MHz, CDCl<sub>3</sub>) δ 7.93 (dt, *J* = 8.5, 1.8 Hz, 2H), 7.74 – 7.59 (m, 1H), 7.51 (td, *J* = 7.8, 7.3, 1.6 Hz, 2H), 5.26 – 5.12 (m, 1H), 3.79 (d, *J* = 6.3 Hz, 1H), 1.46 (d, *J* = 7.1 Hz, 3H).

## 5. Detection of H<sub>2</sub> and HD

### 5.1 Procedure for detection of H<sub>2</sub>

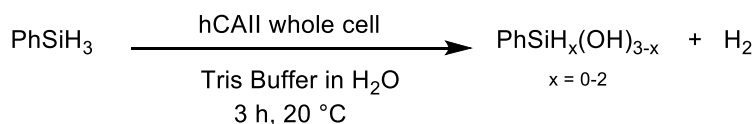

A 4 mL vial was charged with 1 mL of the 0.1 mM solution of the hCAII enzyme in Tris buffer (50 mM in water, pH 8.0), followed by the lyophilized hCAII (3.1 mg, 0.1 μmol), and 1,000 equivalents of PhSiH<sub>3</sub> (12 μL, 100 μmol) relative to hCAII. The vial was sealed with a septum and incubated on an orbital shaker (20 °C, 300 rpm) for 30 min. Upon completion, 0.8 mL of benzene-d<sub>6</sub> was added through the septum by syringe. The vial was gently shaken to ensure that the H<sub>2</sub> gas in the head space dissolved. After the aqueous layer was separated from the organic layer, the benzene-d<sub>6</sub> solution was transferred to an evacuated J Young NMR tube via cannula. The identity of H<sub>2</sub> was confirmed by <sup>1</sup>H NMR spectroscopy

### 5.2 Procedure for detection of HD

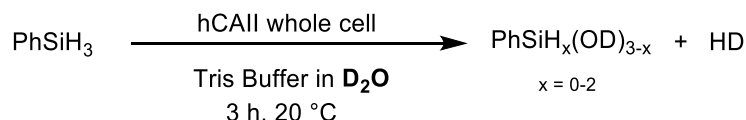

A 4 mL vial was charged with 1 mL of Tris buffer (50 mM, pH 8.0) that was prepared with D<sub>2</sub>O, followed by the lyophilized hCAII (3.1 mg, 0.1 μmol), and 1,000 equivalents of PhSiH<sub>3</sub> (12 μL, 100 μmol) relative to hCAII. The vial was sealed with a septum and incubated on an orbital shaker (20 °C, 300 rpm) for 30 min. Upon completion, 0.8 mL of benzene-d<sub>6</sub> was added through the septum by syringe. The vial was gently shaken to ensure that the HD gas in the head space dissolved. After the aqueous layer was separated from the organic layer, the benzene-d<sub>6</sub> solution was transferred to an evacuated J Young NMR tube via cannula. The identity of HD was confirmed by <sup>1</sup>H NMR spectroscopy.

## 6. Products and Characterizations

(S)-1-(pyridin-4-yl)ethan-1-ol (**2**)

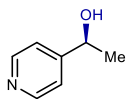

$^1\text{H}$  NMR (400 MHz,  $\text{CDCl}_3$ )  $\delta$  8.83 – 8.33 (m, 2H), 7.29 – 7.26 (m, 2H), 4.88 (q,  $J$  = 6.5 Hz, 1H), 1.48 (d,  $J$  = 6.6 Hz, 3H).

$^{13}\text{C}$  NMR (151 MHz,  $\text{CDCl}_3$ )  $\delta$  155.44, 149.61, 120.64, 68.78, 25.21.

Spectral data match those previously reported.<sup>4</sup>

Separation of enantiomers: SFC IC column, 20% iPrOH in  $\text{scCO}_2$ , 2.5 mL/min flow rate.

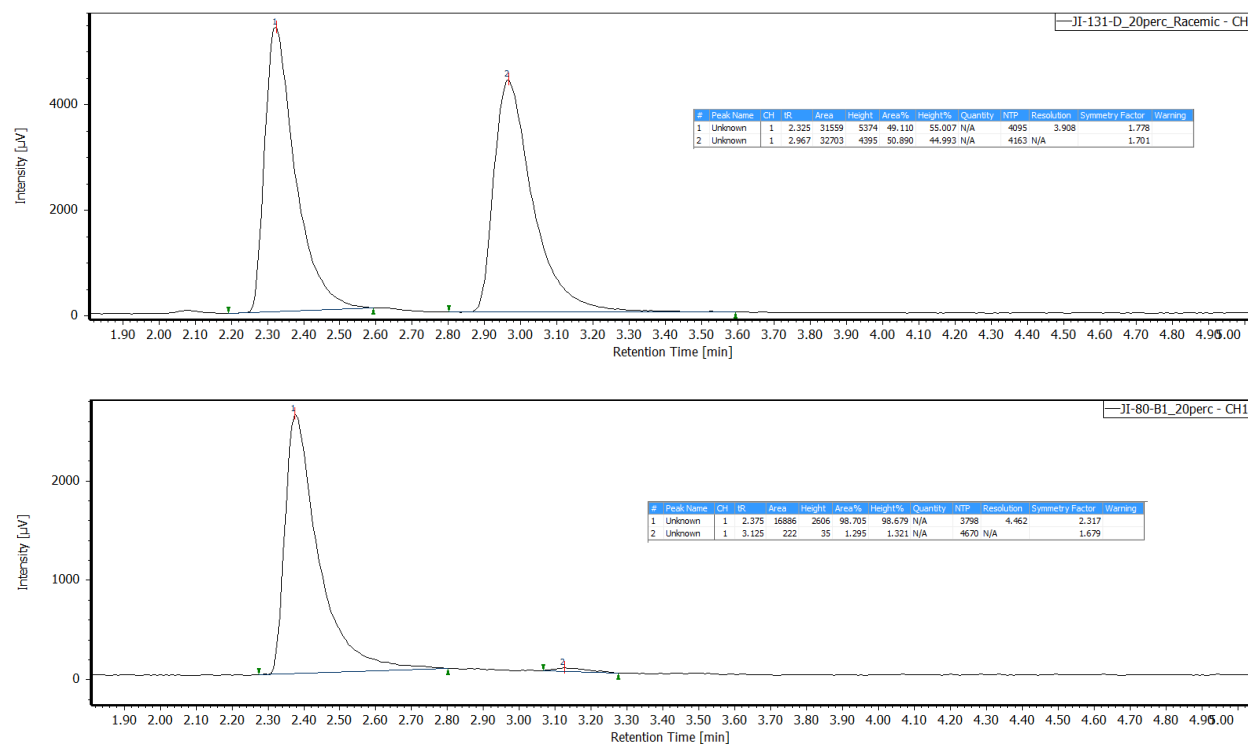

**Supplementary Figure 2.** SFC traces of the racemic 1-(pyridin-4-yl)ethan-1-ol (top) and the enantioenriched products of the hCAII-catalyzed reduction (bottom).

(S)-1-(pyridin-4-yl)ethan-1-d-1-ol (**4**)

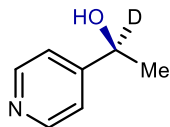

$^1\text{H}$  NMR (400 MHz,  $\text{CDCl}_3$ )  $\delta$  8.69 – 8.37 (m, 1H), 7.66 – 6.96 (m, 1H), 1.52 (s, 1H).

$^2\text{H}$  NMR (92 MHz,  $\text{CDCl}_3$ )  $\delta$  4.87.

$^{13}\text{C}$  NMR (151 MHz,  $\text{CDCl}_3$ )  $\delta$  155.55, 149.50, 120.68, 68.30, 25.07.

HRMS (EI+) calcd for  $[\text{C}_7\text{H}_8^2\text{HNO}]^+$ :  $m/z$  125.0820, found 125.0819.

Optical Rotation:  $[\alpha]_{20\text{D}} = -39.8$  (c 1.0,  $\text{CH}_2\text{Cl}_2$ )

Separation of enantiomers: HPLC OD-H column, 10% iPrOH in hexane, 1.0 mL/min flow rate.

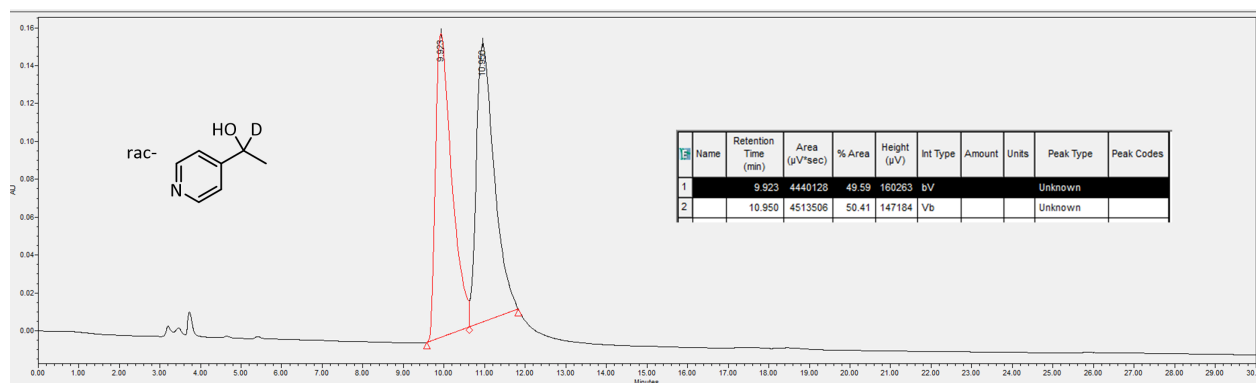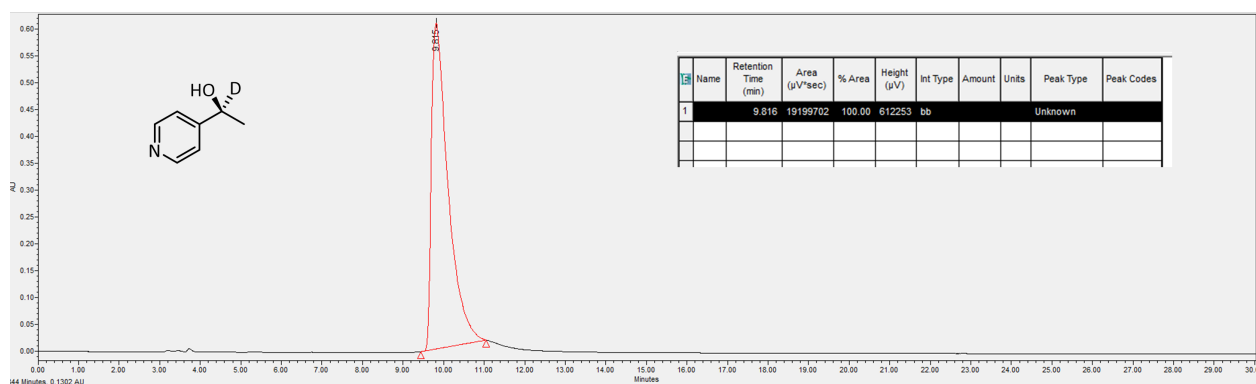

**Supplementary Figure 3.** HPLC traces of the racemic 1-(pyridin-4-yl)ethan-1-d-1-ol (top) and the enantioenriched products of the hCAII-catalyzed reduction (bottom).

(S)-1-phenylethan-1-d-1-ol (**6**)

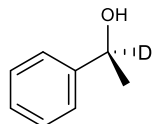

$^1\text{H}$  NMR (400 MHz,  $\text{CDCl}_3$ )  $\delta$  7.46 – 7.39 (m, 3H), 7.39 – 7.29 (m, 2H), 1.54 (t,  $J = 0.9$  Hz, 3H).

$^2\text{H}$  NMR (77 MHz,  $\text{CDCl}_3$ )  $\delta$  4.91

$^{13}\text{C}$  NMR (151 MHz,  $\text{CDCl}_3$ )  $\delta$  145.77, 128.55, 128.52, 127.52, 127.50, 125.42, 125.40, 70.16, 70.01, 69.87, 25.03.

Spectral data match those previously reported.<sup>5,6</sup>

Separation of enantiomers: HPLC OJ-H column, 5.0% iPrOH in hexanes, 1.0 mL/min flow rate.

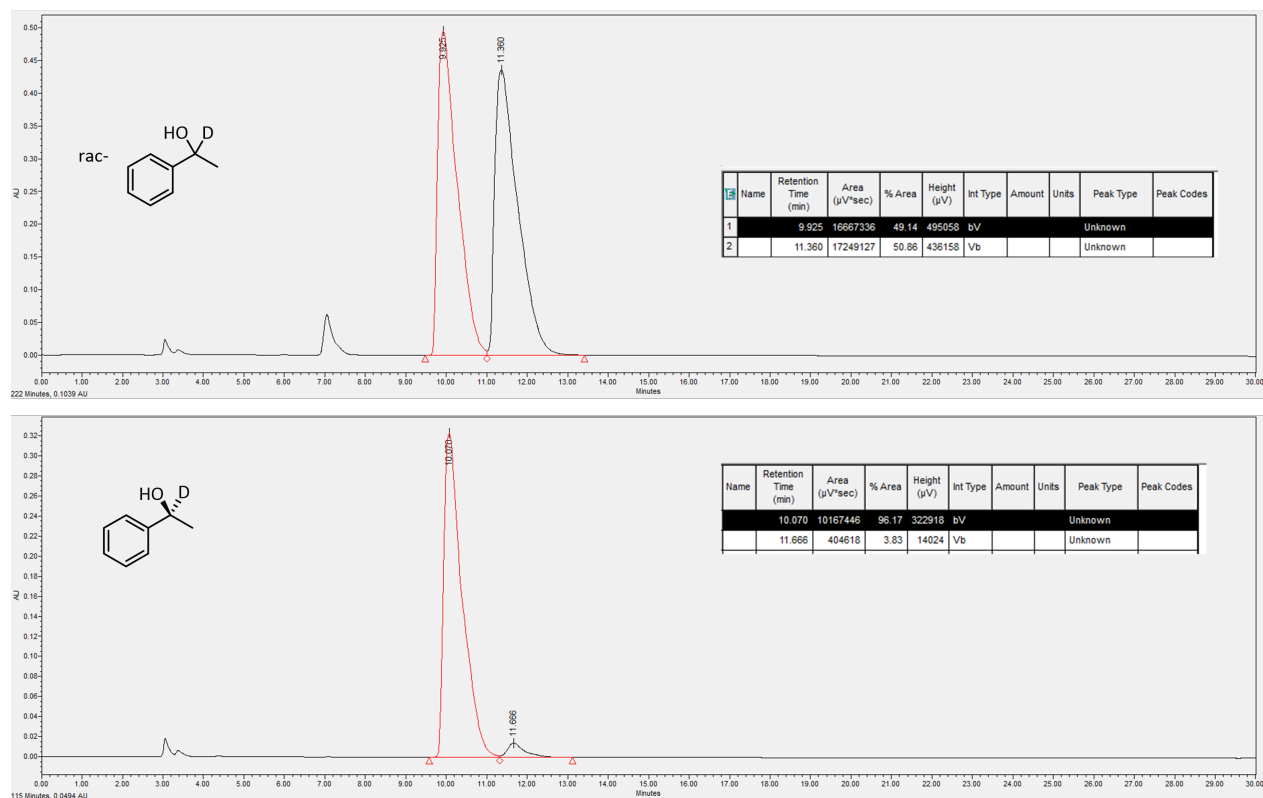

**Supplementary Figure 4.** HPLC traces of the racemic 1-phenylethan-1-d-1-ol (top) and the enantioenriched products of the hCAII-catalyzed reduction (bottom).



(S)-1-phenylethan-1-ol (**7**)

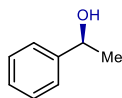

$^1\text{H}$  NMR (400 MHz,  $\text{CDCl}_3$ )  $\delta$  7.40 - 7.31 (m, 4H), 7.30 - 7.23 (m, 1H), 4.93-4.85 (m, 1H), 1.90 (d,  $J = 3.6$  Hz, 1H), 1.49 (d,  $J = 6.4$  Hz, 3H).

$^{13}\text{C}$  NMR (151 MHz,  $\text{CDCl}_3$ )  $\delta$  145.97, 128.63, 127.60, 125.53, 70.53, 25.28.

Spectral data match those previously reported.<sup>4</sup>

Enantiomer separation: SFC OJ-H column, 5% iPrOH in  $\text{scCO}_2$ , 2.5 mL/min flow rate.

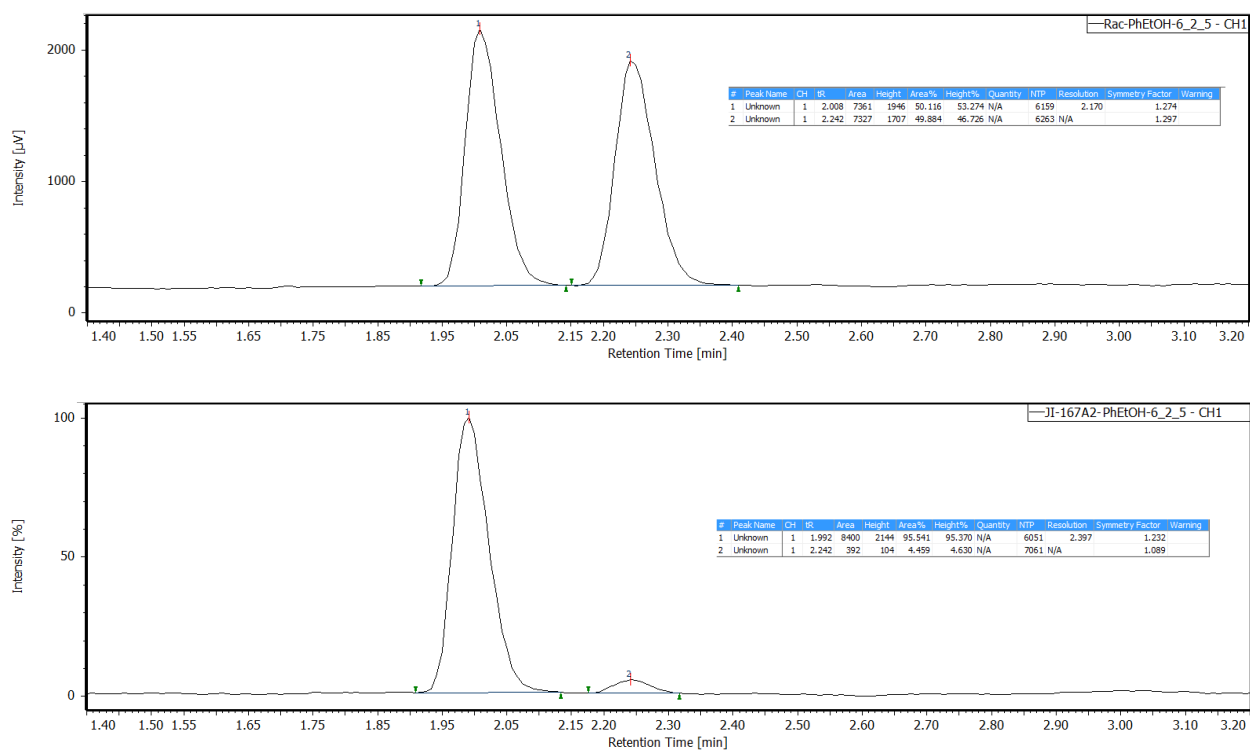

**Supplementary Figure 5.** SFC traces of the racemic 1-phenylethan-1-ol (top) and the enantioenriched products of the hCAII-catalyzed reduction (bottom).

(S)-1-(4-chlorophenyl)ethan-1-ol (**8**)

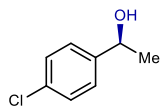

$^1\text{H}$  NMR (400 MHz,  $\text{CDCl}_3$ )  $\delta$  7.90 – 7.81 (m, 2H), 7.43 – 7.33 (m, 2H), 4.83 (q,  $J = 6.5$  Hz, 1H), 1.42 (d,  $J = 6.5$  Hz, 3H).

$^{13}\text{C}$  NMR (151 MHz,  $\text{CDCl}_3$ )  $\delta$  144.38, 133.20, 128.73, 126.92, 69.87, 25.40.

Spectral data match those previously reported.<sup>4</sup>

Enantiomer separation: SFC OJ-H column, 5% iPrOH in  $\text{scCO}_2$ , 2.5 mL/min flow rate.

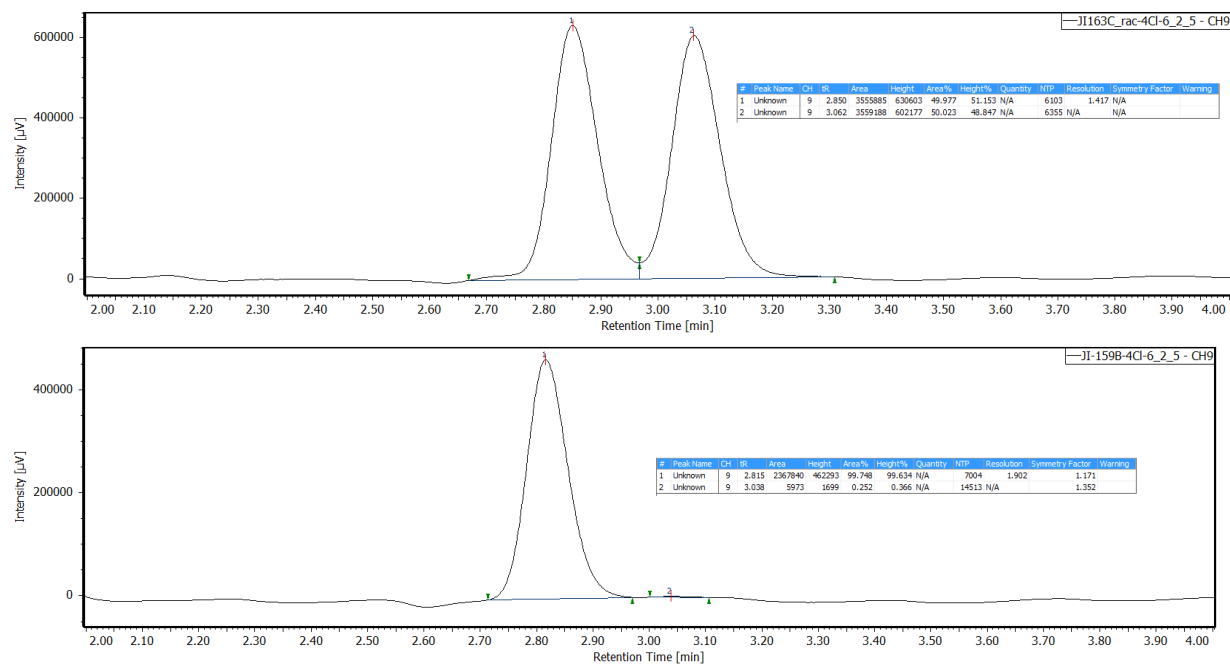

**Supplementary Figure 6.** SFC traces of the racemic 1-(4-chlorophenyl)ethan-1-ol (top) and the enantioenriched products of the hCAII-catalyzed reduction (bottom).

(S)-1-(4-bromophenyl)ethan-1-ol (**9**)

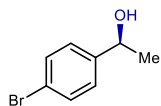

$^1\text{H}$  NMR (400 MHz,  $\text{CDCl}_3$ )  $\delta$  7.46 (d,  $J = 8.0$  Hz, 2H), 7.24 (d,  $J = 8.4$  Hz, 2H), 4.85 (q,  $J = 6.0$  Hz, 1H), 1.96 (s, 1H), 1.46 (d,  $J = 6.4$  Hz, 3H).

$^{13}\text{C}$  NMR (151 MHz,  $\text{CDCl}_3$ )  $\delta$  144.88, 131.66, 127.27, 121.27, 69.88, 25.34.

Spectral data match those previously reported.<sup>4</sup>

Enantiomer separation: SFC OJ-H column, 5% iPrOH in  $\text{scCO}_2$ , 2.5 mL/min flow rate.

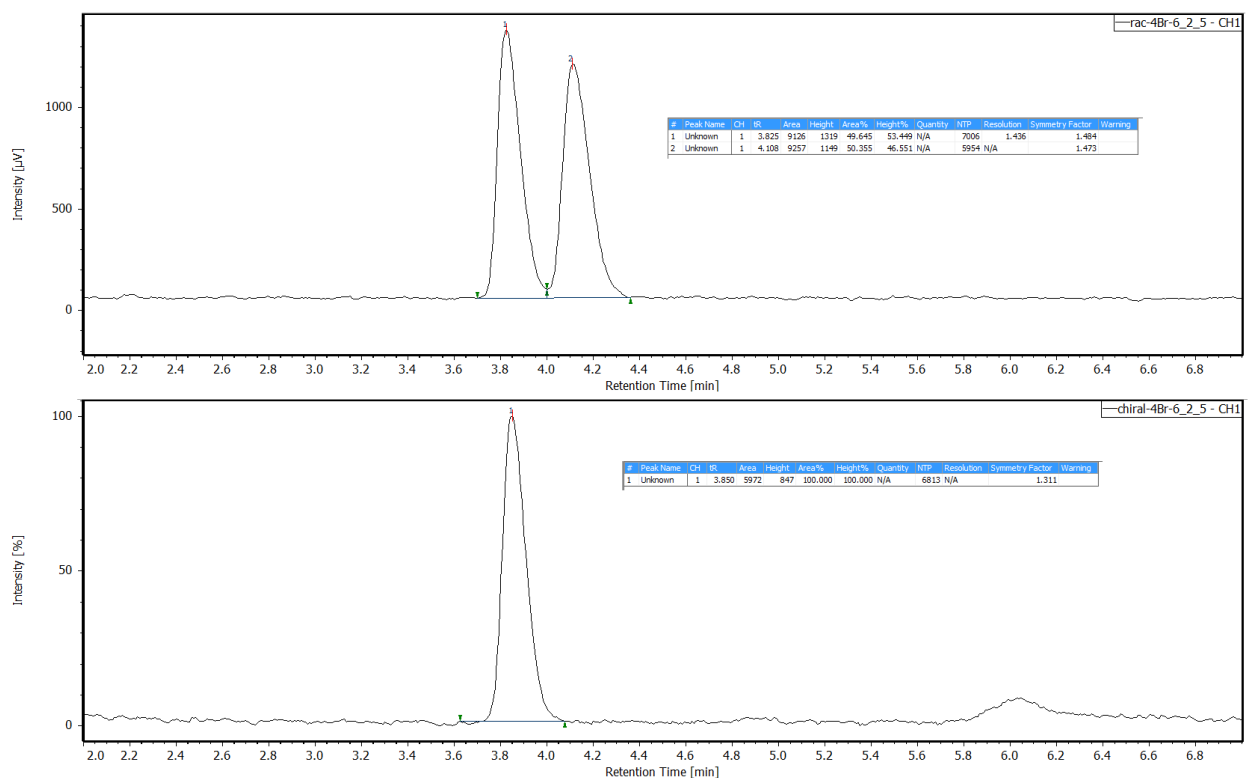

**Supplementary Figure 7.** SFC traces of the racemic 1-(4-bromophenyl)ethan-1-ol (top) and the enantioenriched products of the hCAII-catalyzed reduction (bottom).

(S)-1-(p-tolyl)ethan-1-ol (**10**)

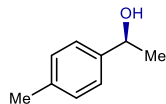

$^1\text{H}$  NMR (400 MHz,  $\text{CDCl}_3$ )  $\delta$  7.26 (d, 2H), 7.16 (d,  $J = 7.8$  Hz, 2H), 4.88 (dd,  $J = 6.5, 3.3$  Hz, 1H), 2.35 (s, 3H), 1.49 (d,  $J = 6.4$  Hz, 3H).

$^{13}\text{C}$  NMR (151 MHz,  $\text{CDCl}_3$ )  $\delta$  143.04, 137.28, 129.30, 125.51, 70.38, 25.22, 21.23.

Spectral data match those previously reported.<sup>4</sup>

Enantiomer separation: SFC OJ-H column, 5% iPrOH in  $\text{scCO}_2$ , 2.5 mL/min flow rate.

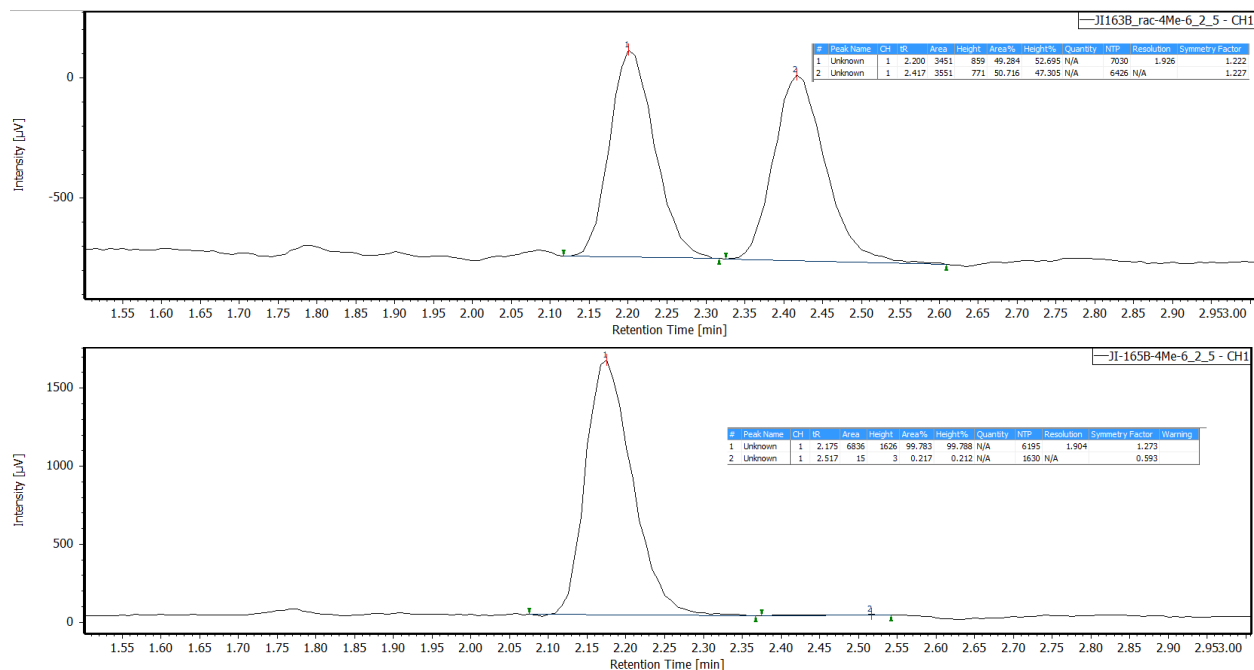

**Supplementary Figure 8.** SFC traces of the racemic 1-(p-tolyl)ethan-1-ol (top) and the enantioenriched products of the hCAII-catalyzed reduction (bottom).

(S)-1-(4-methoxyphenyl)ethan-1-ol (**11**)

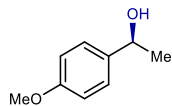

$^1\text{H}$  NMR (400 MHz,  $\text{CDCl}_3$ )  $\delta$  7.31 (d,  $J = 8.7$  Hz, 2H), 6.93 – 6.84 (m, 2H), 4.86 (q,  $J = 6.4$  Hz, 1H), 3.81 (s, 3H), 1.48 (d,  $J = 6.4$  Hz, 3H).

$^{13}\text{C}$  NMR (151 MHz,  $\text{CDCl}_3$ )  $\delta$  159.08, 138.15, 126.79, 113.96, 70.07, 55.41, 25.13.

Spectral data match those previously reported.<sup>7</sup>

Enantiomer separation: SFC AS-H column, 5% iPrOH in  $\text{scCO}_2$ , 2.5 mL/min flow rate.

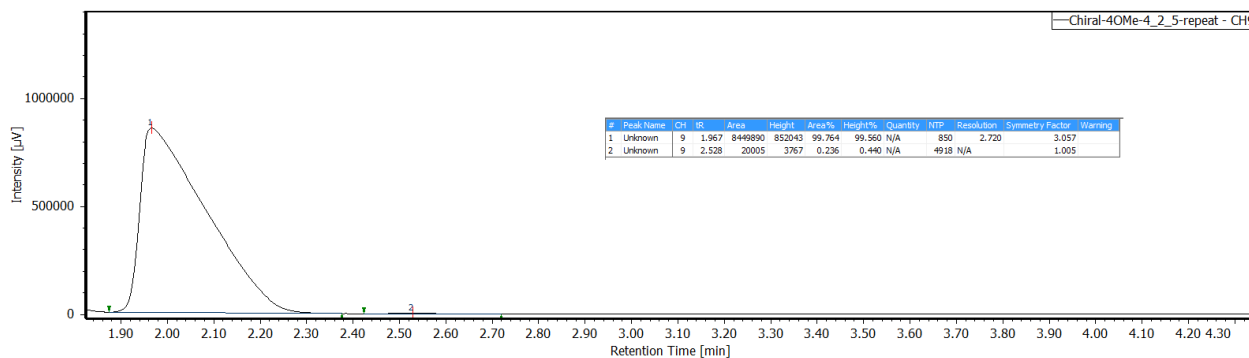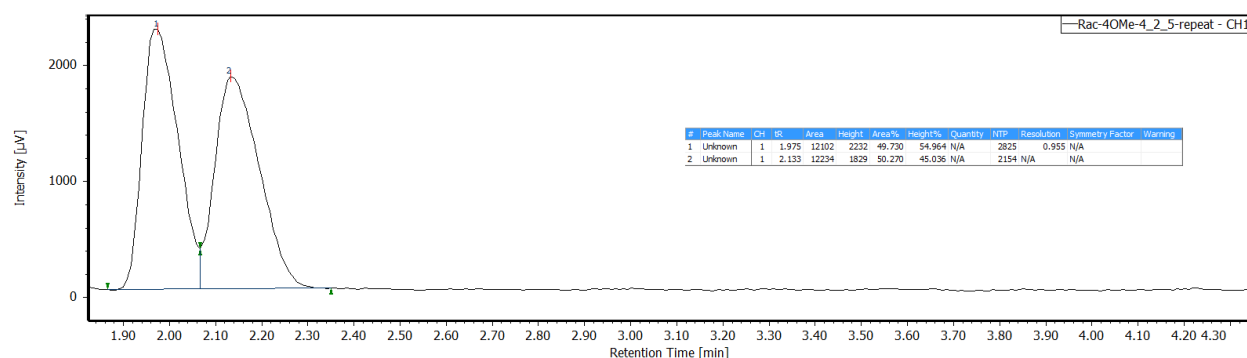

**Supplementary Figure 9.** SFC traces of the racemic 1-(4-methoxyphenyl)ethan-1-ol (top) and the enantioenriched products of the hCAII-catalyzed reduction (bottom).

(S)-1-(4-(methylthio)phenyl)ethan-1-ol (**12**)

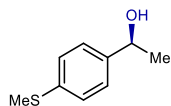

$^1\text{H}$  NMR (400 MHz,  $\text{CDCl}_3$ )  $\delta$  7.30 (d,  $J = 8.4$  Hz, 2H), 7.25 (d,  $J = 8.5$  Hz, 3H), 4.87 (q,  $J = 6.5$  Hz, 1H), 2.48 (s, 3H), 1.48 (d,  $J = 6.4$  Hz, 3H).

$^{13}\text{C}$  NMR (151 MHz,  $\text{CDCl}_3$ )  $\delta$  142.94, 137.57, 127.00, 126.12, 70.13, 25.22, 16.16.

Spectral data match those previously reported.<sup>4</sup>

Enantiomer separation: SFC OJ-H column, 15% iPrOH in  $\text{scCO}_2$ , 2.5 mL/min flow rate.

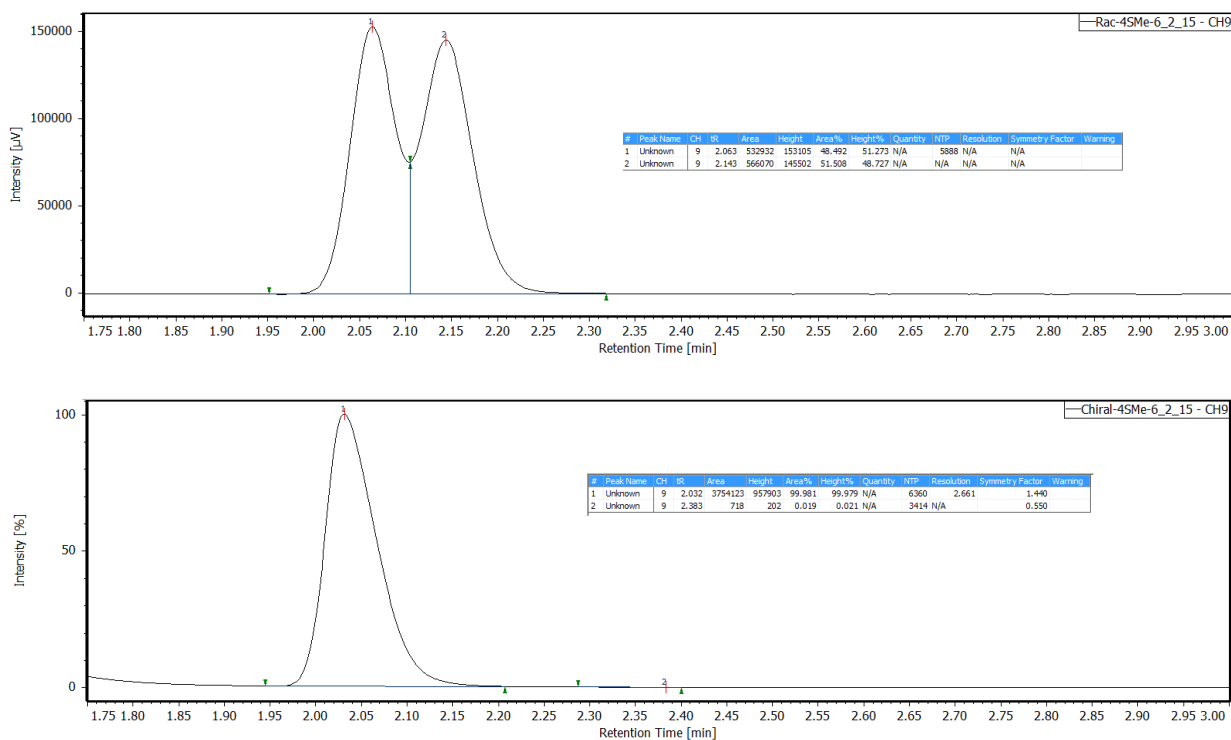

**Supplementary Figure 10.** SFC traces of the racemic 1-(4-(methylthio)phenyl)ethan-1-ol (top) and the enantioenriched products of the hCAII-catalyzed reduction (bottom).

(S)-1-(2-methoxyphenyl)ethan-1-ol (**13**)

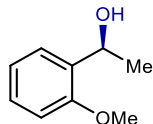

$^1\text{H}$  NMR (400 MHz,  $\text{CDCl}_3$ )  $\delta$  7.34 (dd,  $J = 7.6, 1.7$  Hz, 1H), 7.30 – 7.21 (m, 1H), 6.97 (tt,  $J = 7.5, 1.0$  Hz, 1H), 6.89 (dd,  $J = 8.2, 1.1$  Hz, 1H), 5.10 (q,  $J = 6.5$  Hz, 1H), 3.87 (d,  $J = 0.8$  Hz, 3H), 1.51 (dd,  $J = 6.5, 0.8$  Hz, 3H).

$^{13}\text{C}$  NMR (151 MHz,  $\text{CDCl}_3$ )  $\delta$  156.69, 133.59, 128.43, 126.23, 120.94, 110.58, 66.65, 55.40, 23.00.  
Spectral data match those previously reported.<sup>7</sup>

Enantiomer separation: SFC OJ-H column, 5% iPrOH in  $\text{scCO}_2$ , 2.5 mL/min flow rate.

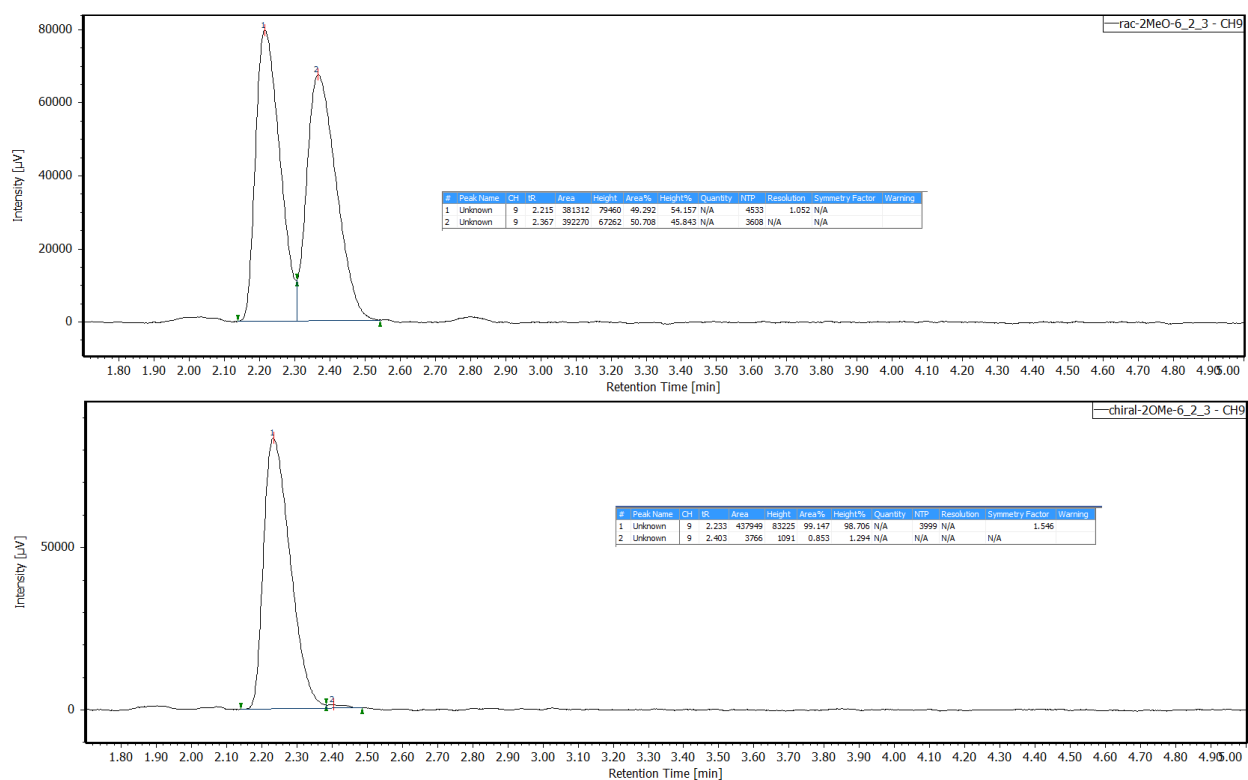

**Supplementary Figure 11.** SFC traces of the racemic 1-(2-methoxyphenyl)ethan-1-ol (top) and the enantioenriched products of the hCAII-catalyzed reduction (bottom).

(S)-1-(3-bromophenyl)ethan-1-ol (**14**)

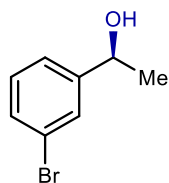

$^1\text{H}$  NMR (400 MHz,  $\text{CDCl}_3$ )  $\delta$  7.58 (t,  $J = 1.8$  Hz, 1H), 7.44 (ddd,  $J = 7.9, 2.1, 1.3$  Hz, 1H), 7.34 (dt,  $J = 7.7, 1.6$  Hz, 1H), 7.26 (t,  $J = 7.7$  Hz, 1H), 4.92 (qd,  $J = 6.4, 3.6$  Hz, 1H), 1.53 (d,  $J = 6.4$  Hz, 3H).

$^{13}\text{C}$  NMR (151 MHz,  $\text{CDCl}_3$ )  $\delta$  148.24, 130.59, 130.21, 128.69, 124.14, 122.73, 69.86, 25.36.

Spectral data match those previously reported.<sup>4</sup>

Enantiomer separation: SFC OJ-H column, 5% iPrOH in  $\text{scCO}_2$ , 2.5 mL/min flow rate.

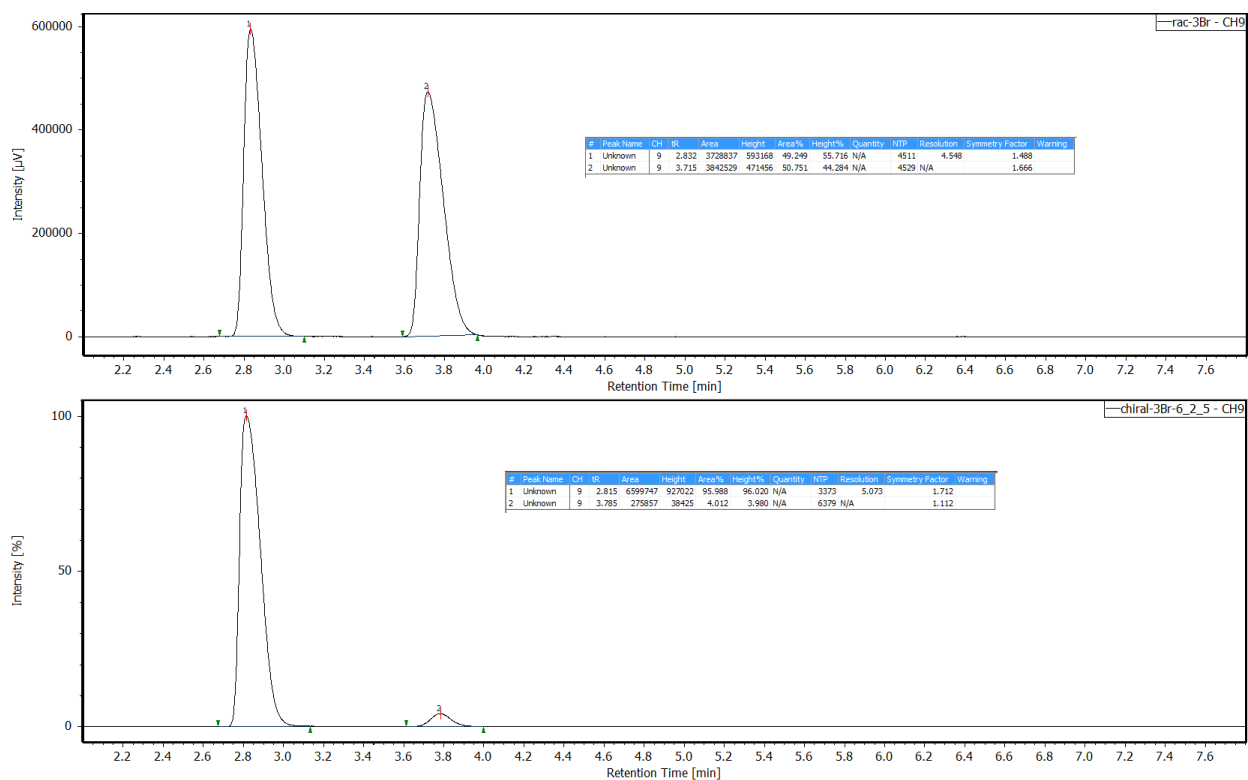

**Supplementary Figure 12.** SFC traces of the racemic 1-(3-bromophenyl)ethan-1-ol (top) and the enantioenriched products of the hCAII-catalyzed reduction (bottom).



(S)-1-(2-chlorophenyl)ethan-1-ol (**15**)

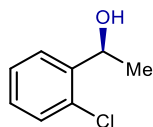

$^1\text{H}$  NMR (400 MHz,  $\text{CDCl}_3$ )  $\delta$  7.60 (dd,  $J = 7.7, 1.7$  Hz, 1H), 7.38 – 7.28 (m, 2H), 7.20 (td,  $J = 7.6, 1.8$  Hz, 1H), 5.30 (qd,  $J = 6.4, 2.8$  Hz, 1H), 1.50 (d,  $J = 6.4$  Hz, 3H).

$^{13}\text{C}$  NMR (151 MHz,  $\text{CDCl}_3$ )  $\delta$  143.20, 131.76, 129.52, 128.52, 127.34, 126.55, 67.08, 23.63.

Spectral data match those previously reported.<sup>4</sup>

Enantiomer separation: SFC OJ-H column, 3% iPrOH in  $\text{scCO}_2$ , 4.0 mL/min flow rate.

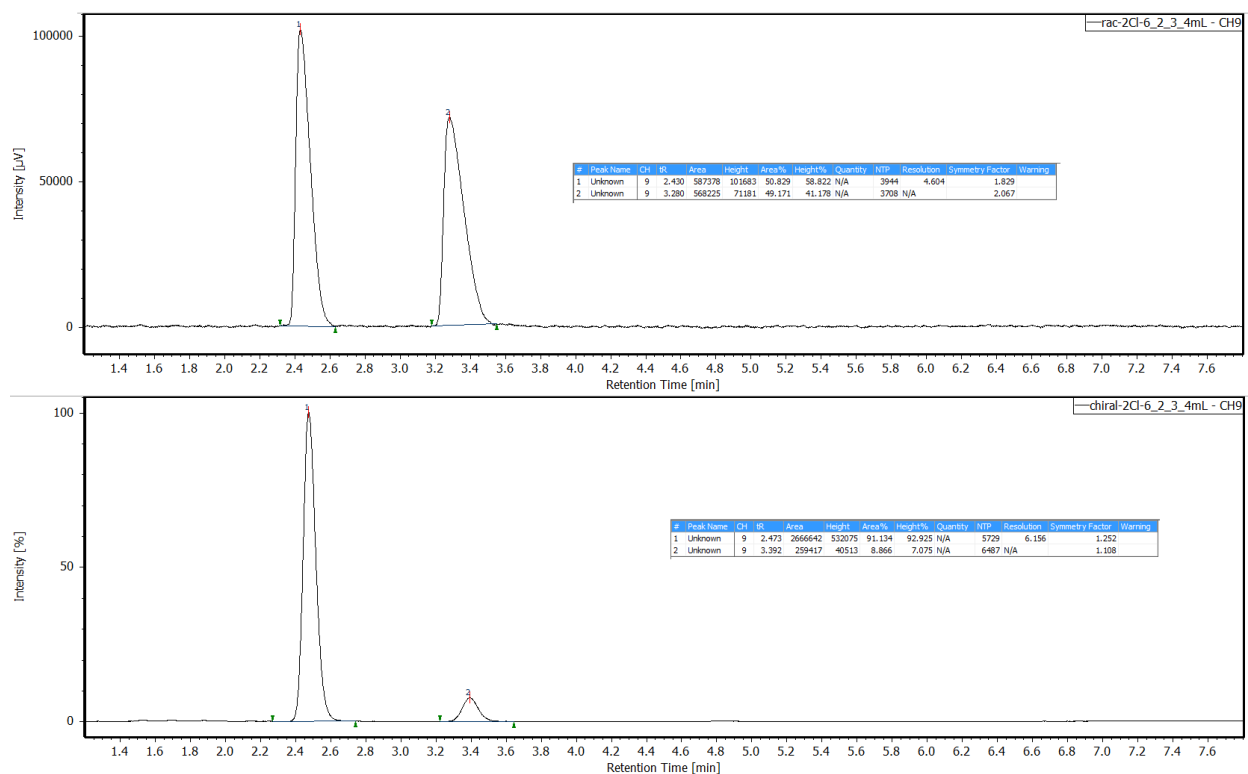

**Supplementary Figure 13.** SFC traces of the racemic 1-(2-chlorophenyl)ethan-1-ol (top) and the enantioenriched products of the hCAII-catalyzed reduction (bottom).

(S)-1-(2,6-dichloro-3-fluorophenyl)ethan-1-ol (**16**)

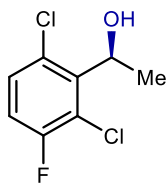

$^1\text{H}$  NMR (400 MHz,  $\text{CDCl}_3$ )  $\delta$  7.38 – 7.27 (m, 1H), 7.12 – 7.03 (m, 1H), 5.62 (q,  $J$  = 6.9 Hz, 1H), 1.69 (d,  $J$  = 6.8 Hz, 3H).

$^{13}\text{C}$  NMR (151 MHz,  $\text{CDCl}_3$ )  $\delta$  158.23, 156.58, 140.66, 129.76, 129.71, 115.85, 115.70, 68.51, 21.42.

$^{19}\text{F}$  NMR (376 MHz,  $\text{CDCl}_3$ )  $\delta$  -113.31 (s)

Spectral data match those previously reported.<sup>8</sup>

Enantiomer separation: SFC OJ-H column, 5% iPrOH in  $\text{scCO}_2$ , 2.5 mL/min flow rate.

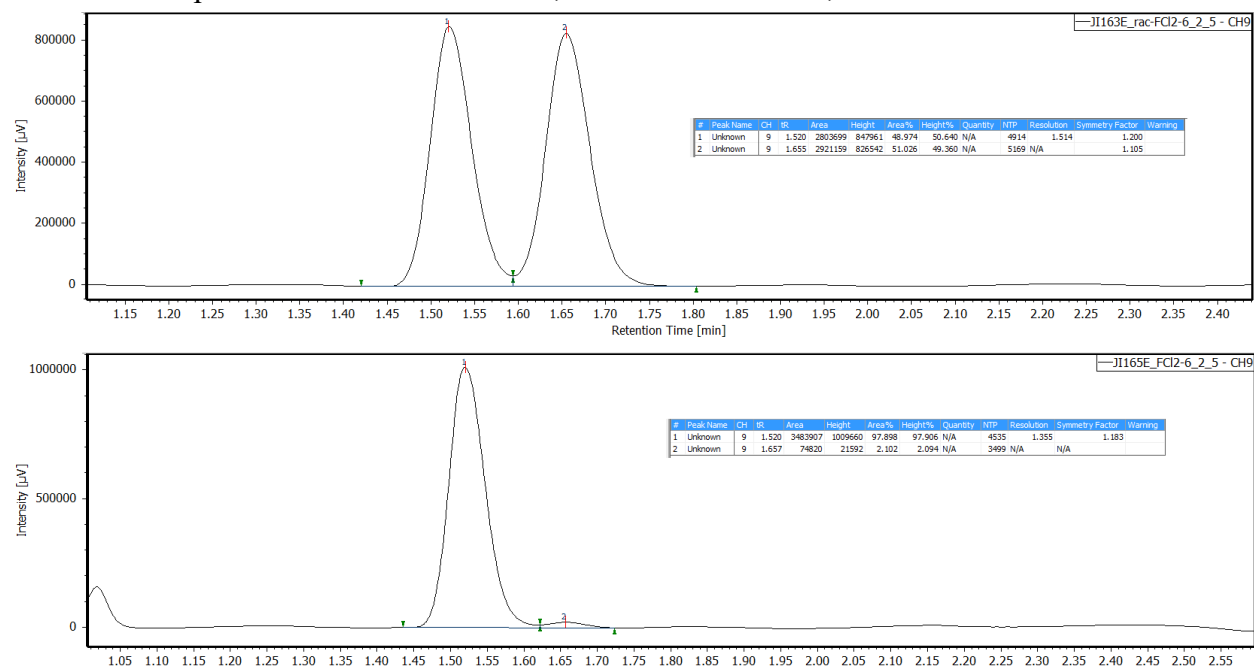

**Supplementary Figure 14.** SFC traces of the racemic 1-(2,6-dichloro-3-fluorophenyl)ethan-1-ol (top) and the enantioenriched products of the hCAII-catalyzed reduction (bottom).

(S)-1-(3,5-bis(trifluoromethyl)phenyl)ethan-1-ol (**17**)

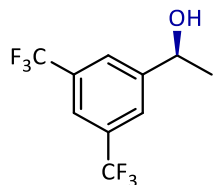

$^1\text{H}$  NMR (400 MHz,  $\text{CDCl}_3$ )  $\delta$  7.89 (s, 2H), 7.83 (s, 1H), 5.22 – 4.99 (m, 1H).

$^{13}\text{C}$  NMR (151 MHz,  $\text{CDCl}_3$ )  $\delta$  148.33, 131.97, 125.74, 124.36, 121.41, 69.37, 25.68.

$^{19}\text{F}$  NMR (376 MHz,  $\text{CDCl}_3$ )  $\delta$  -62.81 (s)

Spectral data match those previously reported.<sup>7</sup>

Enantiomer separation: HPLC AS-H column, 1% iPrOH in hexane, 1.0 mL/min flow rate.

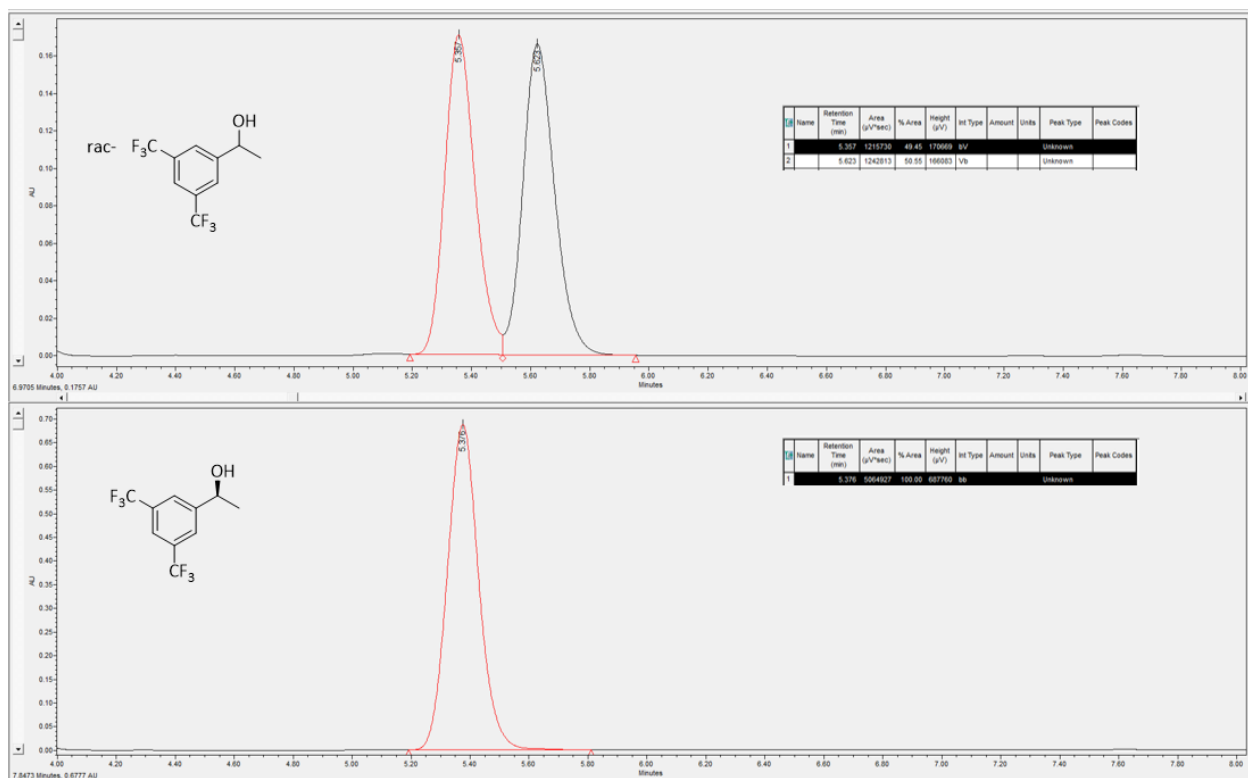

**Supplementary Figure 15.** HPLC traces of the racemic 1-(3,5-bis(trifluoromethyl)phenyl)ethan-1-ol (top) and the enantioenriched products of the hCAII-catalyzed reduction (bottom).

(S)-1-(naphthalen-2-yl)ethan-1-ol (**18**)

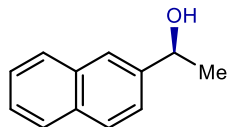

$^1\text{H}$  NMR (400 MHz,  $\text{CDCl}_3$ )  $\delta$  7.88 (m, 4H), 7.56 (m, 1H), 7.54 – 7.50 (m, 2H), 5.13 (qd,  $J = 6.5$ , 3.5 Hz, 1H), 1.63 (d,  $J = 6.5$  Hz, 3H).

$^{13}\text{C}$  NMR (151 MHz,  $\text{CDCl}_3$ )  $\delta$  143.30, 133.46, 133.05, 128.44, 128.06, 127.80, 126.28, 125.92, 123.94, 123.93, 70.66, 25.25.

Spectral data match those previously reported.<sup>4</sup>

Enantiomer separation: SFC OD-H column, 10% iPrOH in  $\text{scCO}_2$ , 2.5 mL/min flow rate.

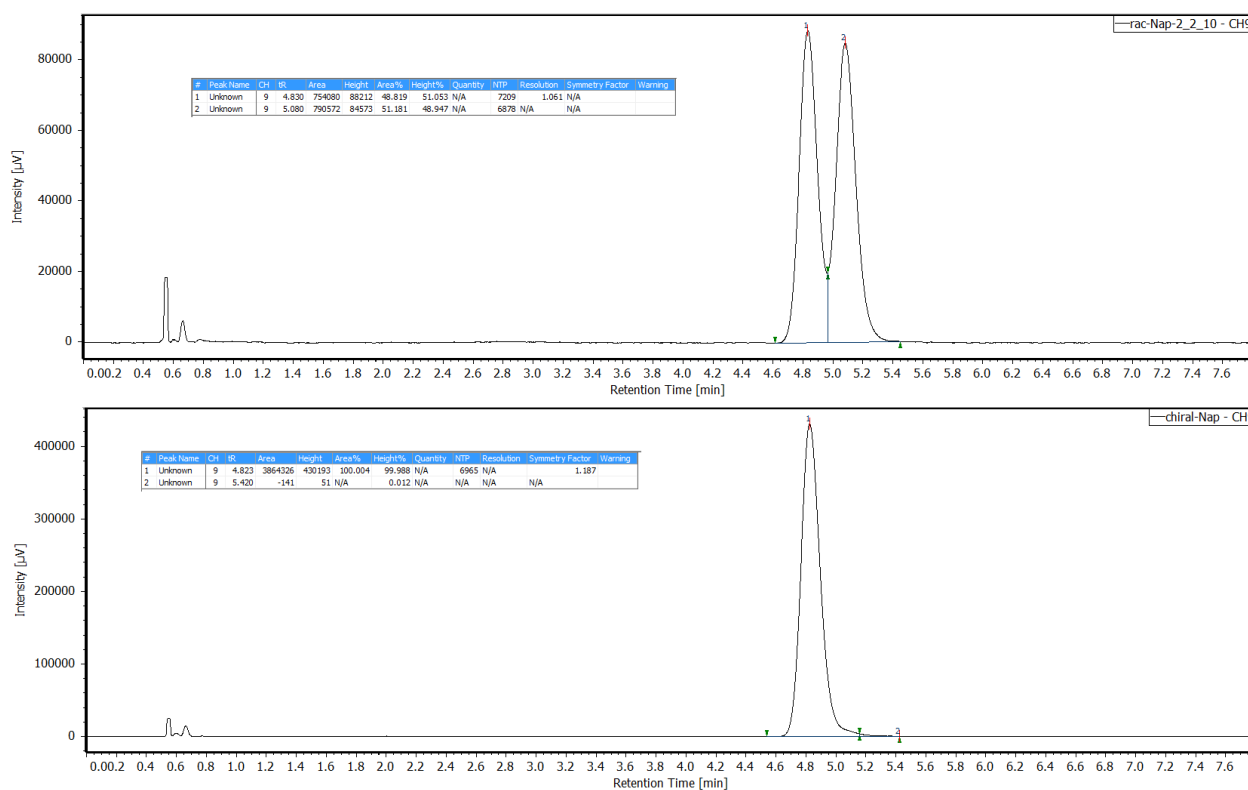

**Supplementary Figure 16.** SFC traces of the racemic 1-(naphthalen-2-yl)ethan-1-ol (top) and the enantioenriched products of the hCAII-catalyzed reduction (bottom).

(S)-1-phenylpropan-1-ol (**19**)

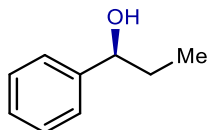

$^1\text{H}$  NMR (400 MHz,  $\text{CDCl}_3$ )  $\delta$  7.42 – 7.32 (m, 4H), 7.32 – 7.27 (m, 1H), 4.60 (dd,  $J = 7.1, 6.1$  Hz, 1H), 1.96 – 1.71 (m, 2H), 0.92 (t,  $J = 7.4$  Hz, 3H).

$^{13}\text{C}$  NMR (151 MHz,  $\text{CDCl}_3$ )  $\delta$  144.75, 128.51, 127.59, 126.12, 76.11, 31.99, 10.26.

Spectral data match those previously reported.<sup>7</sup>

Enantiomer separation: HPLC AD-H column, 2% iPrOH in hexane, 1.0 mL/min flow rate.

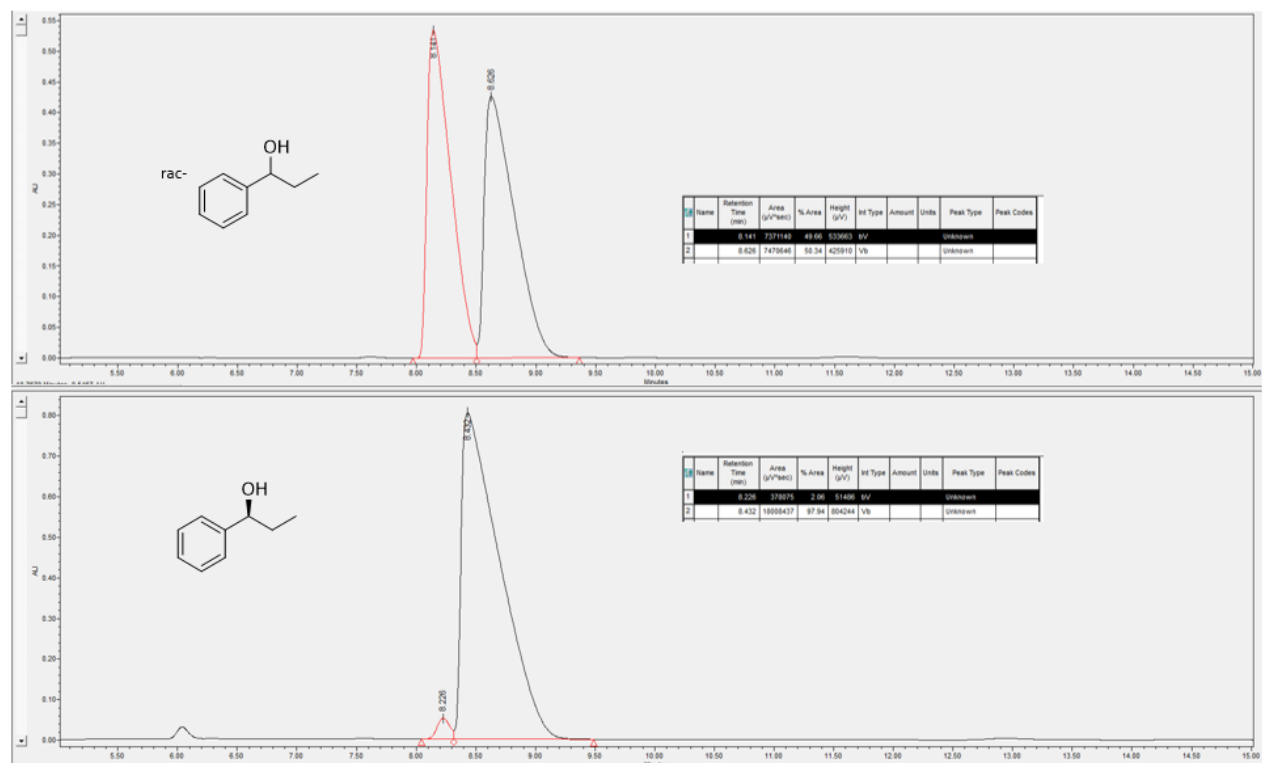

**Supplementary Figure 17.** HPLC traces of the racemic 1-phenylpropan-1-ol (top) and the enantioenriched products of the hCAII-catalyzed reduction (bottom).

(S)-1-(3-bromophenyl)propan-1-ol (**20**)

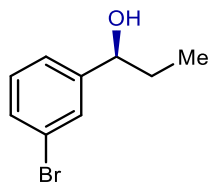

$^1\text{H}$  NMR (400 MHz,  $\text{CDCl}_3$ )  $\delta$  7.54 – 7.50 (m, 1H), 7.44 – 7.38 (m, 1H), 7.34 (dd,  $J = 15.5, 7.6$  Hz, 1H), 7.25 – 7.18 (m, 1H), 4.59 (t,  $J = 6.5$  Hz, 1H), 1.88 – 1.67 (m, 2H), 0.93 (t,  $J = 7.4$  Hz, 3H).  
 $^{13}\text{C}$  NMR (151 MHz,  $\text{CDCl}_3$ )  $\delta$  147.05, 130.61, 130.09, 129.20, 124.72, 122.67, 75.38, 32.04, 10.09.  
Spectral data match those previously reported.<sup>9</sup>

Enantiomer separation: SFC OJ-H column, 5% iPrOH in  $\text{scCO}_2$ , 2.5 mL/min flow rate.

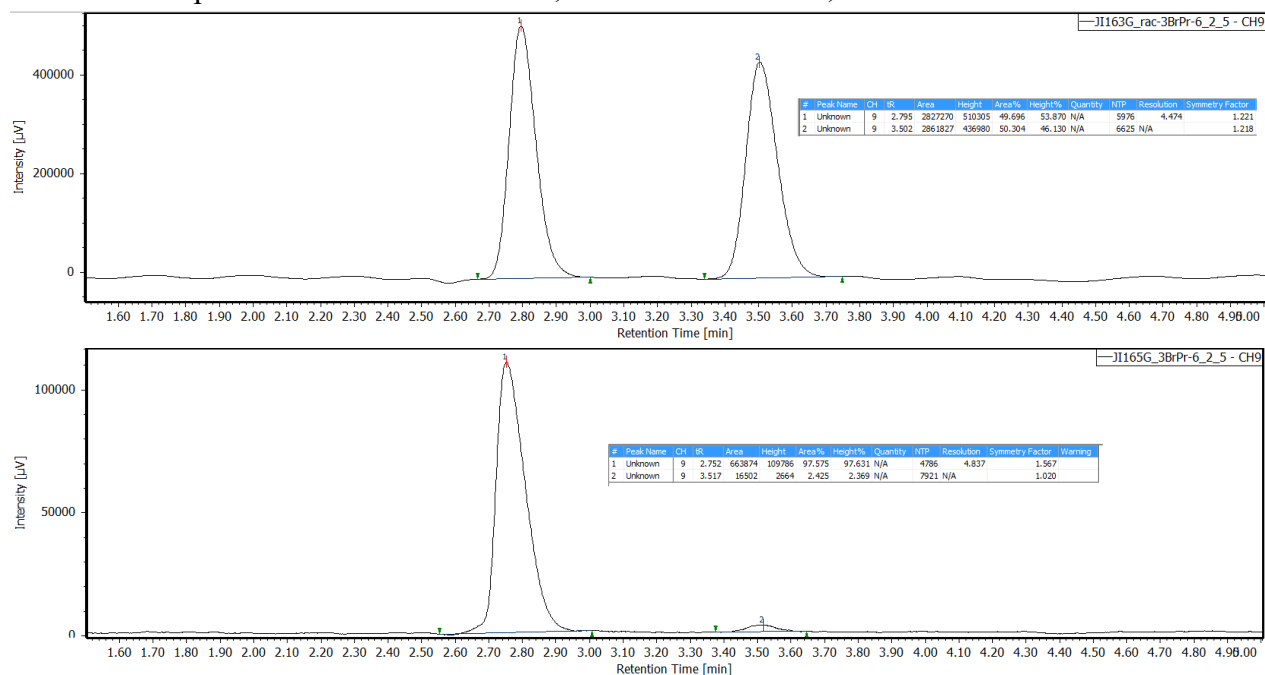

**Supplementary Figure 18.** SFC traces of the racemic 1-(3-bromophenyl)propan-1-ol (top) and the enantioenriched products of the hCAII-catalyzed reduction (bottom).

(R)-2-fluoro-1-phenylethan-1-ol (**21**)

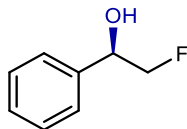

$^1\text{H}$  NMR (400 MHz,  $\text{CDCl}_3$ )  $\delta$  7.42 – 7.31 (m, 5H), 5.10 – 4.87 (m, 1H), 4.63 – 4.32 (m, 2H).

$^{13}\text{C}$  NMR (151 MHz,  $\text{CDCl}_3$ )  $\delta$  138.36, 138.30, 128.77, 128.54, 126.48, 87.87, 86.71, 73.14, 73.01.

$^{19}\text{F}$  NMR (376 MHz,  $\text{CDCl}_3$ )  $\delta$  -220.73 (m)

Spectral data match those previously reported.<sup>10</sup>

Enantiomer separation: SFC OJ-H column, 5% iPrOH in  $\text{scCO}_2$ , 2.5 mL/min flow rate.

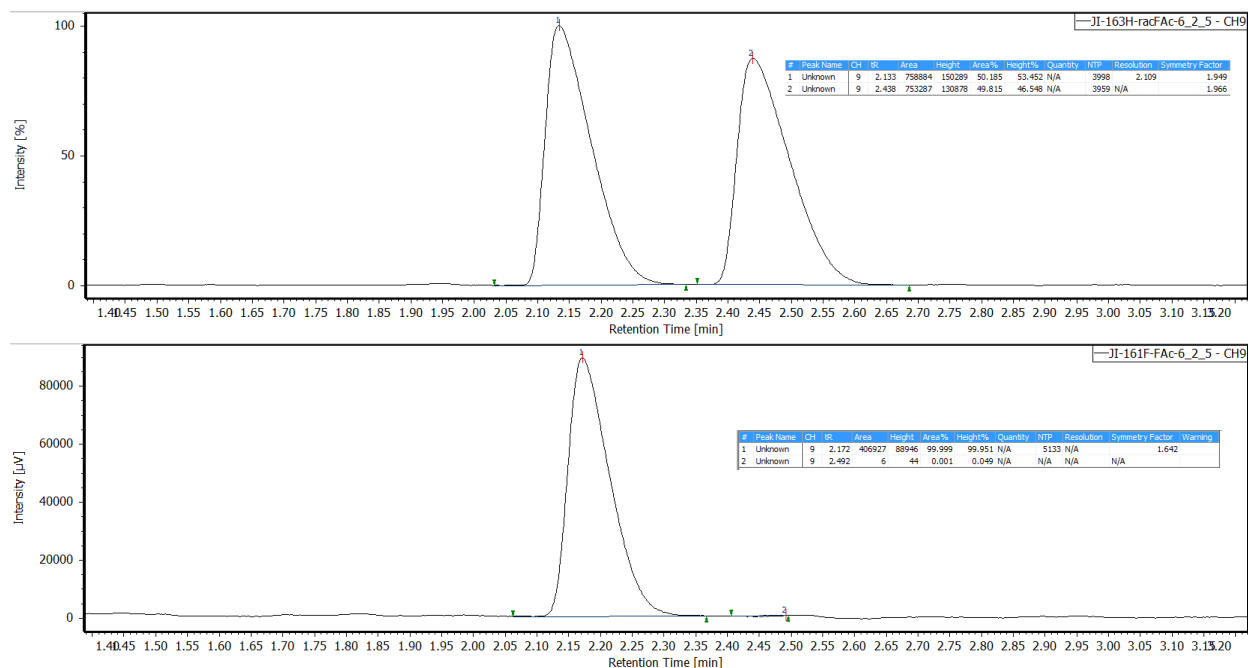

**Supplementary Figure 19.** SFC traces of the racemic 2-fluoro-1-phenylethan-1-ol (top) and the enantioenriched products of the hCAII-catalyzed reduction (bottom).

(R)-2,2,2-trifluoro-1-phenylethan-1-ol (**22**)

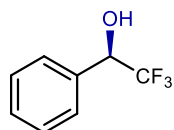

$^1\text{H}$  NMR (400 MHz,  $\text{CDCl}_3$ )  $\delta$  7.58 – 7.45 (m, 2H), 7.44 – 7.38 (m, 3H), 5.03 (q,  $J = 6.7$  Hz, 1H).

$^{13}\text{C}$  NMR (151 MHz,  $\text{CDCl}_3$ )  $\delta$  134.17, 129.64, 128.73, 127.56, 125.33, 73.03.

$^{19}\text{F}$  NMR (376 MHz,  $\text{CDCl}_3$ )  $\delta$  -78.36 (d,  $J = 56.6$  Hz)

Spectral data match those previously reported.<sup>11</sup>

Enantiomer separation: SFC OJ-H column, 5% iPrOH in  $\text{scCO}_2$ , 2.5 mL/min flow rate.

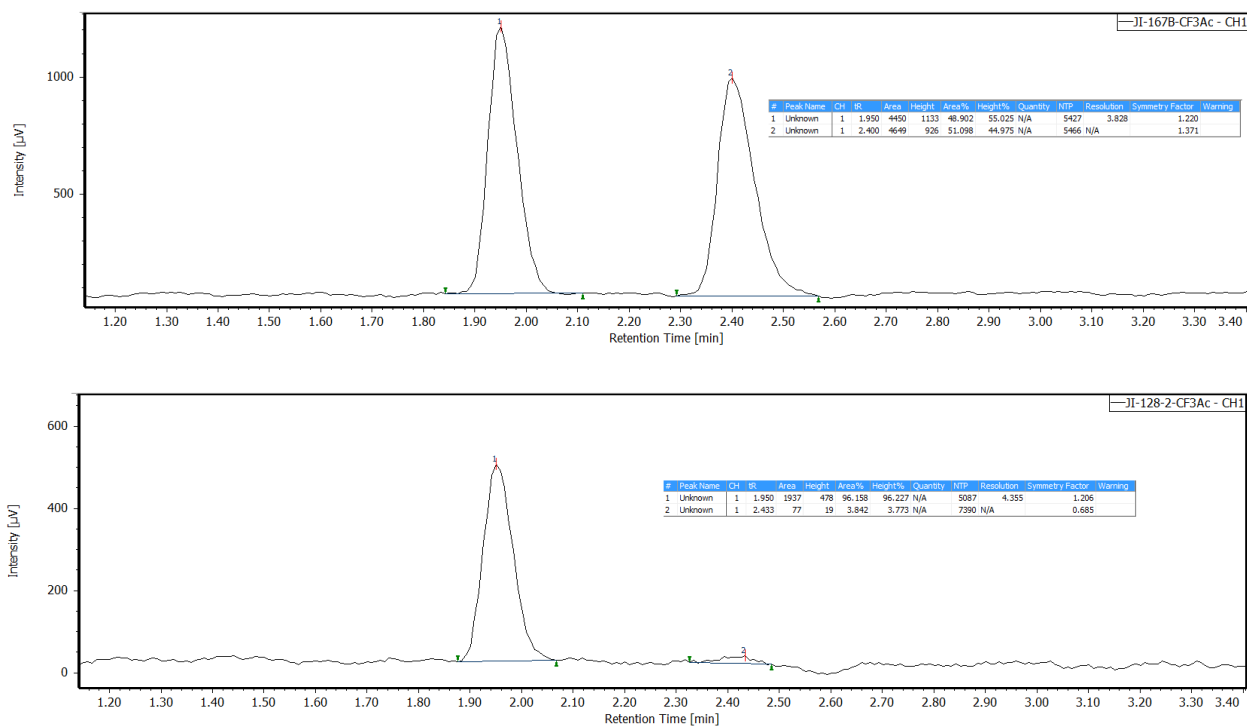

**Supplementary Figure 20.** SFC traces of the racemic 2,2,2-trifluoro-1-phenylethan-1-ol (top) and the enantioenriched products of the hCAII-catalyzed reduction (bottom).



(S)-1-(pyridin-2-yl)ethan-1-ol (**23**)

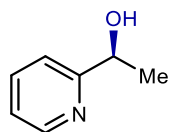

$^1\text{H}$  NMR (400 MHz,  $\text{CDCl}_3$ )  $\delta$  8.53 (dt,  $J = 4.9, 1.4$  Hz, 1H), 7.69 (td,  $J = 7.7, 1.7$  Hz, 1H), 7.33 – 7.26 (m, 1H), 7.20 (ddd,  $J = 7.4, 4.9, 1.2$  Hz, 1H), 4.89 (q,  $J = 6.6$  Hz, 1H), 1.50 (d,  $J = 6.6$  Hz, 3H).

$^{13}\text{C}$  NMR (151 MHz,  $\text{CDCl}_3$ )  $\delta$  163.20, 148.23, 136.95, 122.35, 119.93, 69.02, 24.32.

Spectral data match those previously reported.<sup>7</sup>

Enantiomer separation: SFC IC column, 2% iPrOH in  $\text{scCO}_2$ , 4.0 mL/min flow rate.

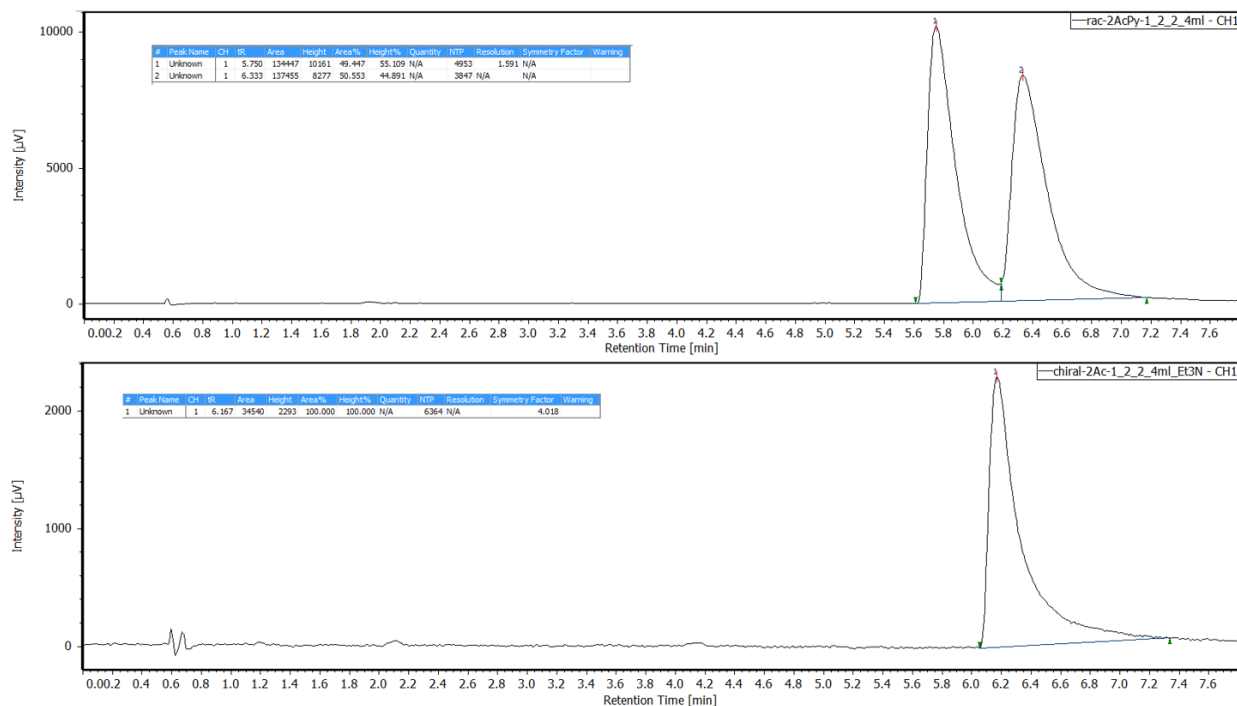

**Supplementary Figure 21.** SFC traces of the racemic 1-(pyridin-2-yl)ethan-1-ol (top) and the enantioenriched products of the hCAII-catalyzed reduction (bottom).

(S)-1-(pyridin-3-yl)ethan-1-ol (**24**)

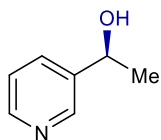

$^1\text{H}$  NMR (400 MHz,  $\text{CDCl}_3$ )  $\delta$  8.53 (d,  $J$  = 2.4 Hz, 1H), 8.44 (dd,  $J$  = 4.8, 1.7 Hz, 1H), 7.72 (dt,  $J$  = 8.0, 1.9 Hz, 1H), 7.26 (q,  $J$  = 4.5 Hz, 1H), 4.92 (q,  $J$  = 6.5 Hz, 1H), 1.50 (d,  $J$  = 6.4 Hz, 3H).

$^{13}\text{C}$  NMR (151 MHz,  $\text{CDCl}_3$ )  $\delta$  148.21, 147.04, 141.62, 133.77, 123.77, 67.94, 25.30.

Spectral data match those previously reported.<sup>4</sup>

Enantiomer separation: HPLC OJ-H column, 10% iPrOH in Hexane, 0.8 mL/min flow rate.

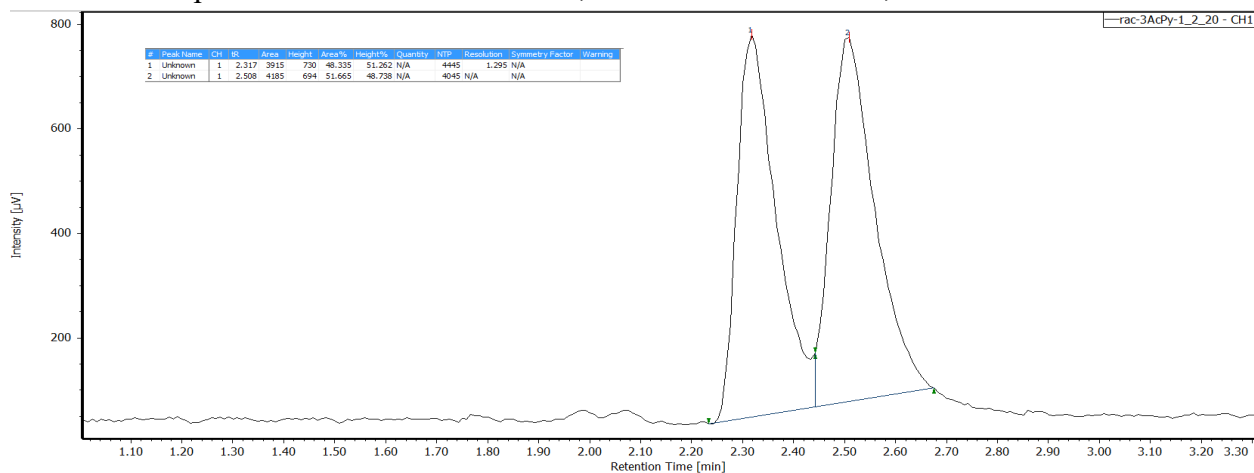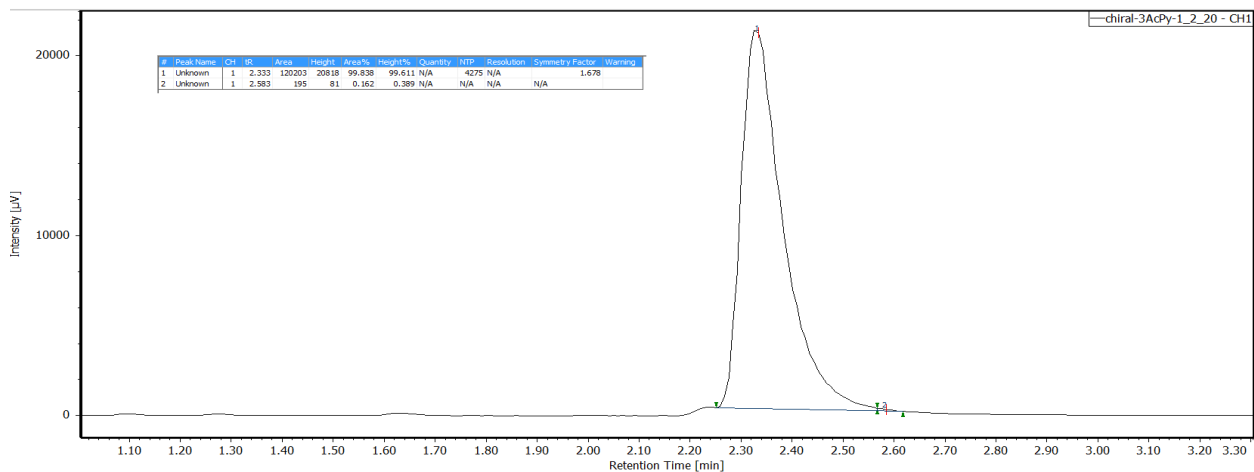

**Supplementary Figure 22.** SFC traces of the racemic 1-(pyridin-3-yl)ethan-1-ol (top) and the enantioenriched products of the hCAII-catalyzed reduction (bottom).

(S)-1-(pyrazin-2-yl)ethan-1-ol (**25**)

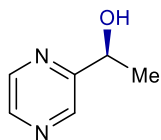

$^1\text{H}$  NMR (400 MHz,  $\text{CDCl}_3$ )  $\delta$  8.72 (s, 1H), 8.56 (m, 2H), 5.04 (q,  $J = 6.6$  Hz, 1H), 1.62 (dd,  $J = 6.6, 0.8$  Hz, 3H).

$^{13}\text{C}$  NMR (151 MHz,  $\text{CDCl}_3$ )  $\delta$  158.75, 143.50, 143.23, 142.51, 68.07, 24.05.

Spectral data match those previously reported.<sup>12</sup>

Enantiomer separation: SFC OD column, 5% iPrOH in  $\text{scCO}_2$ , 2.5 mL/min flow rate.

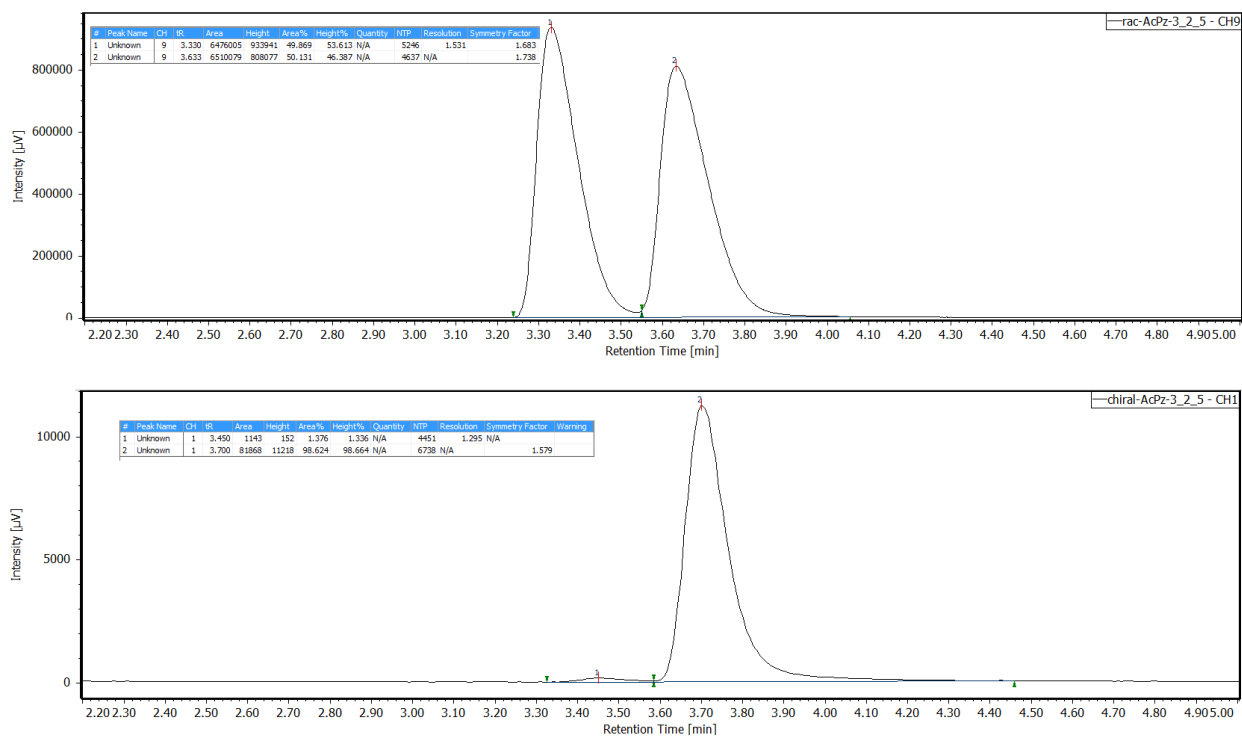

**Supplementary Figure 23.** SFC traces of the racemic 1-(pyrazin-2-yl)ethan-1-ol (top) and the enantioenriched products of the hCAII-catalyzed reduction (bottom).

(S)-1-(5-bromopyridin-3-yl)ethan-1-ol (**26**)

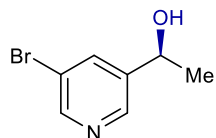

$^1\text{H}$  NMR (400 MHz,  $\text{CDCl}_3$ )  $\delta$  8.55 (d,  $J = 2.2$  Hz, 1H), 8.47 (d,  $J = 1.9$  Hz, 1H), 7.89 (t,  $J = 2.0$  Hz, 1H), 4.93 (q,  $J = 6.5$  Hz, 1H), 1.51 (d,  $J = 6.5$  Hz, 3H).

$^{13}\text{C}$  NMR (151 MHz,  $\text{CDCl}_3$ )  $\delta$  149.26, 145.22, 143.66, 136.41, 121.06, 67.08, 25.34.

Spectral data match those previously reported.<sup>13</sup>

Enantiomer separation: SFC OJ-H column, 5% iPrOH in  $\text{scCO}_2$ , 2.5 mL/min flow rate.

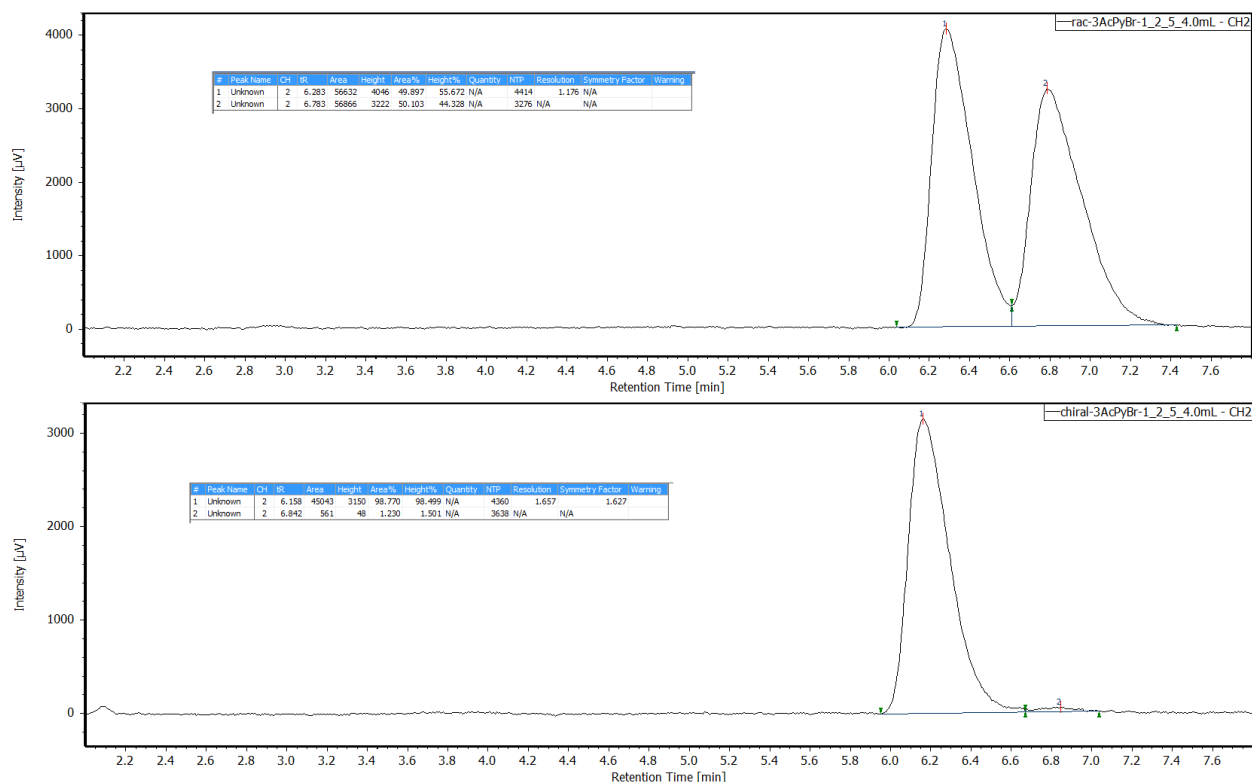

**Supplementary Figure 24.** SFC traces of the racemic 1-(5-bromopyridin-3-yl)ethan-1-ol (top) and the enantioenriched products of the hCAII-catalyzed reduction (bottom).

(S)-1-(furan-2-yl)ethan-1-ol (**27**)

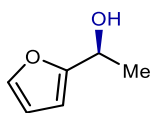

$^1\text{H}$  NMR (400 MHz,  $\text{CDCl}_3$ )  $\delta$  8.55 (d,  $J = 2.2$  Hz, 1H), 8.47 (d,  $J = 1.9$  Hz, 1H), 7.89 (t,  $J = 2.0$  Hz, 1H), 4.93 (q,  $J = 6.5$  Hz, 1H), 1.51 (d,  $J = 6.5$  Hz, 3H).

$^{13}\text{C}$  NMR (151 MHz,  $\text{CDCl}_3$ )  $\delta$  157.77, 141.96, 110.22, 105.19, 63.65, 21.36.

Spectral data match those previously reported.<sup>13</sup>

Enantiomer separation: HPLC IF column, 5% iPrOH in hexane, 1.0 mL/min flow rate.

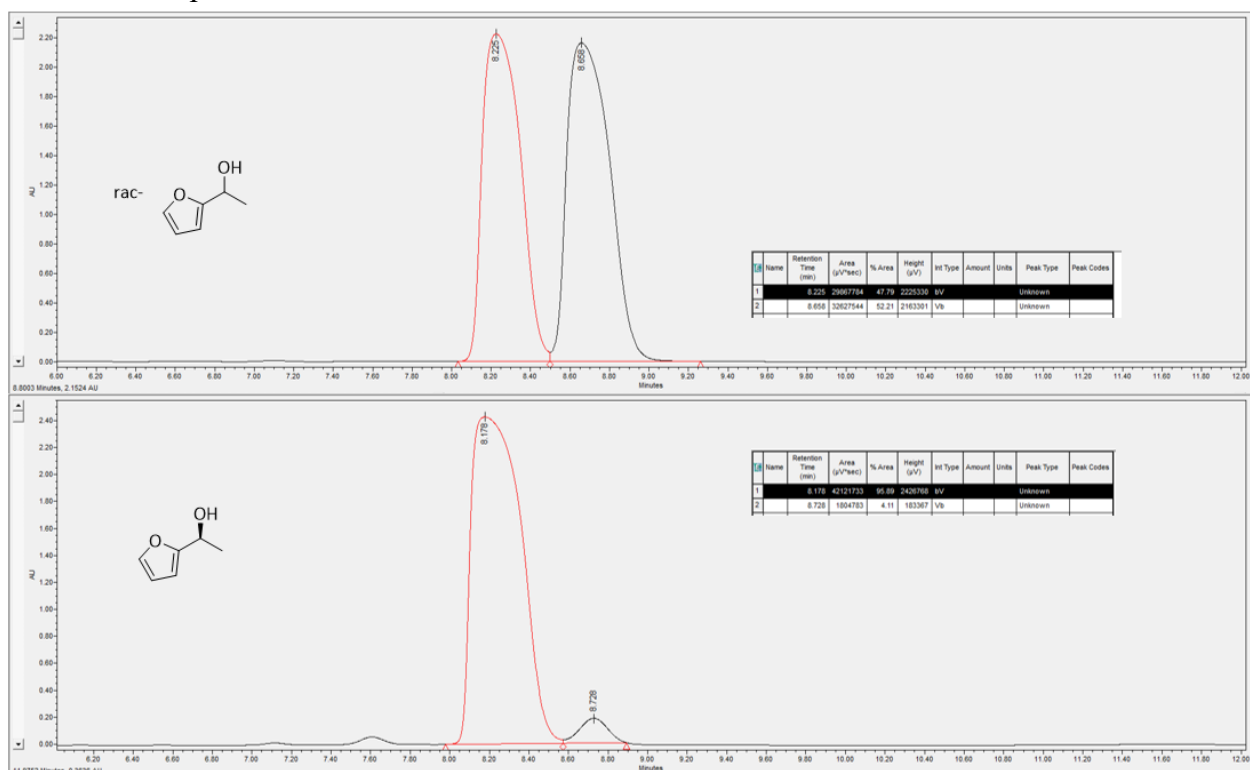

**Supplementary Figure 25.** HPLC traces of the racemic 1-(furan-2-yl)ethan-1-ol (top) and the enantioenriched products of the hCAII-catalyzed reduction (bottom).

(S,E)-4-(thiophen-2-yl)but-3-en-2-ol (**28**)

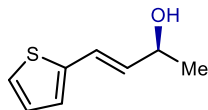

$^1\text{H}$  NMR (400 MHz,  $\text{CDCl}_3$ )  $\delta$  7.16 – 7.10 (m, 1H), 6.96 – 6.88 (m, 2H), 6.67 (dd,  $J = 15.7, 1.3$  Hz, 1H), 6.07 (dd,  $J = 15.7, 6.3$  Hz, 1H), 4.42 (pd,  $J = 6.4, 1.3$  Hz, 1H), 1.33 (d,  $J = 6.4$  Hz, 3H).

$^{13}\text{C}$  NMR (151 MHz,  $\text{CDCl}_3$ )  $\delta$  141.95, 133.29, 127.47, 125.90, 124.39, 122.71, 68.69, 23.45.

Spectral data match those previously reported.<sup>14</sup>

Enantiomer separation: SFC OJ-H column, 5% iPrOH in  $\text{scCO}_2$ , 2.5 mL/min flow rate.

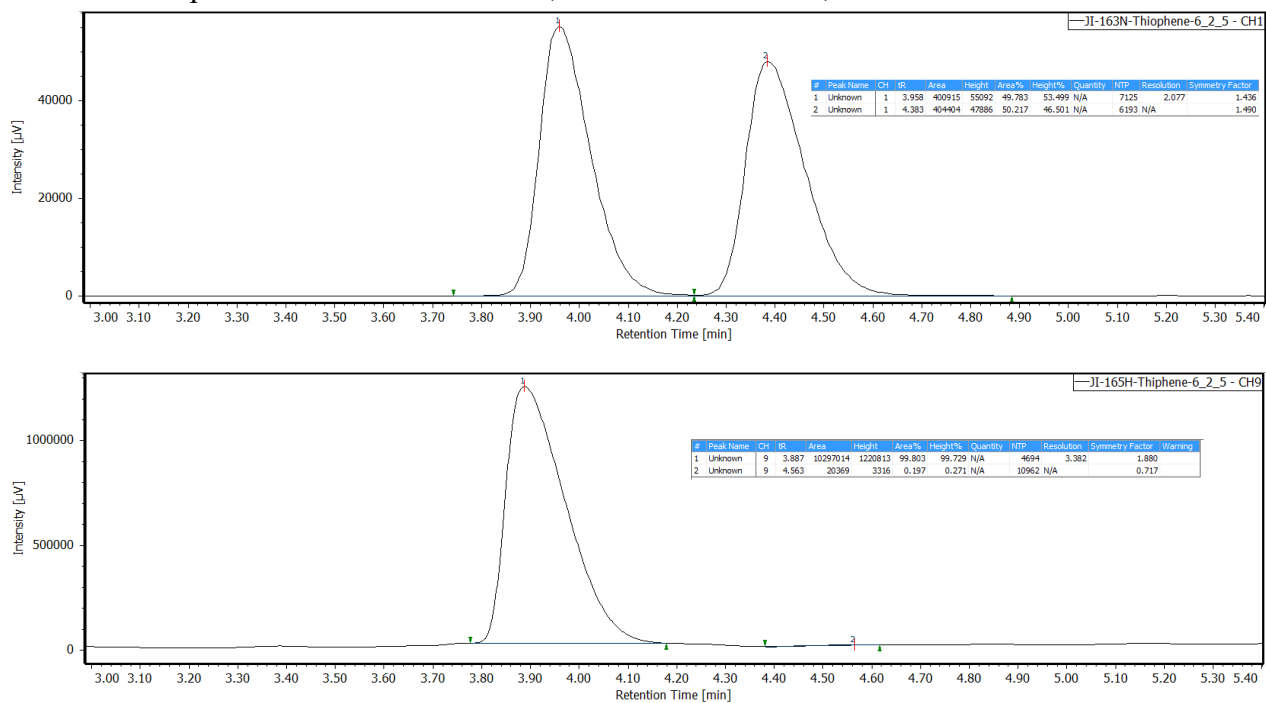

**Supplementary Figure 26.** SFC traces of the racemic E-4-(thiophen-2-yl)but-3-en-2-ol (top) and the enantioenriched products of the hCAII-catalyzed reduction (bottom).

(S)-3-hydroxy-1-phenylbutan-1-one (**29**)

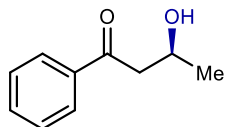

$^1\text{H}$  NMR (400 MHz,  $\text{CDCl}_3$ )  $\delta$  8.01 (dt,  $J = 8.5, 1.1$  Hz, 2H), 7.73 – 7.63 (m, 1H), 7.58 – 7.47 (m, 2H), 4.46 (dq,  $J = 9.3, 6.3, 3.1$  Hz, 1H), 3.37 (d,  $J = 3.1$  Hz, 1H), 3.23 (ddd,  $J = 17.7, 2.8, 1.0$  Hz, 1H), 3.09 (dd,  $J = 17.8, 9.0$  Hz, 1H), 1.35 (d,  $J = 6.4$  Hz, 3H).

$^{13}\text{C}$  NMR (151 MHz,  $\text{CDCl}_3$ )  $\delta$  201.00, 136.84, 133.69, 128.83, 128.21, 64.18, 46.63, 22.56.

Spectral data match those previously reported.<sup>15</sup>

Enantiomer separation: SFC OJ-H column, 5% iPrOH in  $\text{scCO}_2$ , 2.5 mL/min flow rate.

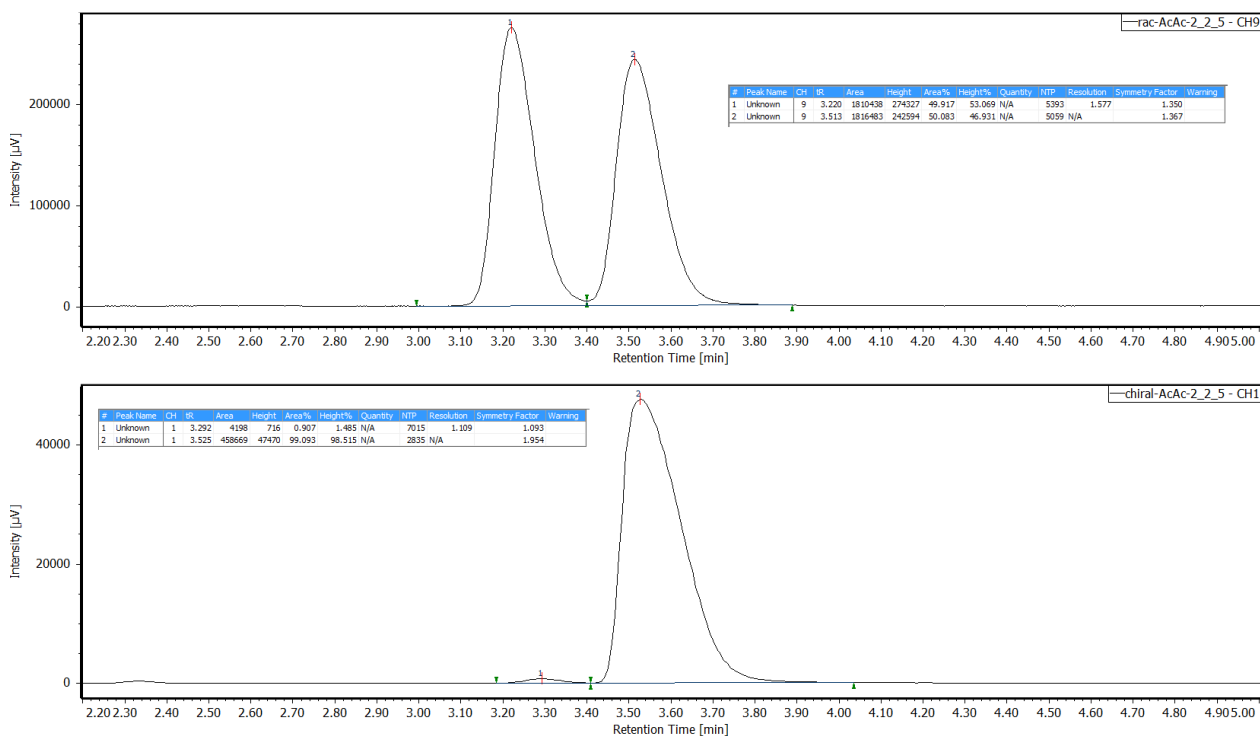

**Supplementary Figure 27.** SFC traces of the racemic 3-hydroxy-1-phenylbutan-1-one (top) and the enantioenriched products of the hCAII-catalyzed reduction (bottom).

(S)-2-hydroxy-1-phenylpropan-1-one (**30**)

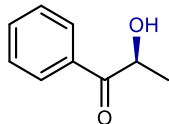

$^1\text{H}$  NMR (400 MHz,  $\text{CDCl}_3$ )  $\delta$  7.93 (dt,  $J = 8.5, 1.8$  Hz, 2H), 7.74 – 7.59 (m, 1H), 7.51 (td,  $J = 7.8, 7.3, 1.6$  Hz, 2H), 5.26 – 5.12 (m, 1H), 3.79 (d,  $J = 6.3$  Hz, 1H), 1.46 (d,  $J = 7.1$  Hz, 3H).

$^{13}\text{C}$  NMR (151 MHz,  $\text{CDCl}_3$ )  $\delta$  202.52, 134.12, 133.48, 129.01, 128.79, 69.46, 22.43.

Spectral data match those previously reported.<sup>16</sup>

Enantiomer separation: SFC OD-H column, 5% iPrOH in  $\text{scCO}_2$ , 2.5 mL/min flow rate.

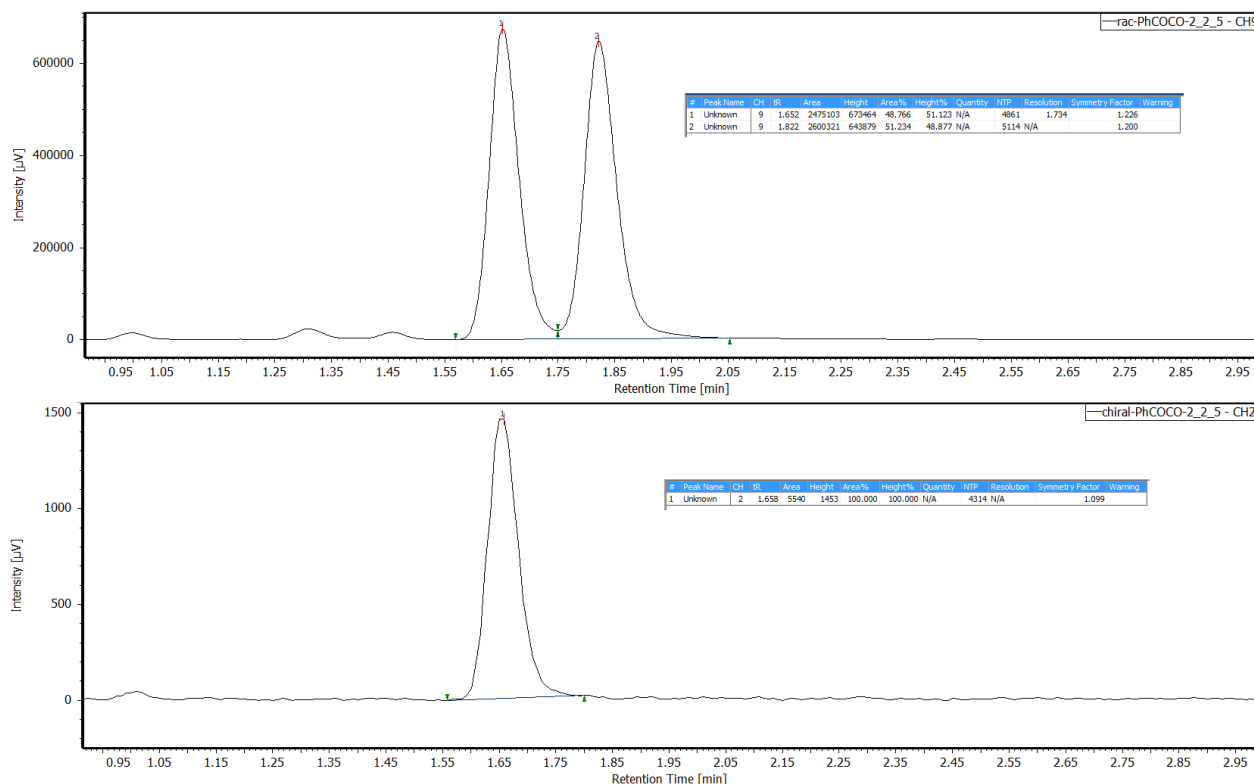

**Supplementary Figure 28.** SFC traces of the racemic 2-hydroxy-1-phenylpropan-1-one (top) and the enantioenriched products of the hCAII-catalyzed reduction (bottom).



(S)-1-(2-bromophenyl)ethan-1-ol (**32**)

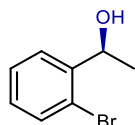

$^1\text{H}$  NMR (400 MHz,  $\text{CDCl}_3$ )  $\delta$  7.63 (dd,  $J = 7.8, 1.8$  Hz, 1H), 7.56 (dd,  $J = 8.0, 1.3$  Hz, 1H), 7.38 (td,  $J = 7.5, 1.2$  Hz, 1H), 7.17 (ddd,  $J = 8.0, 7.3, 1.8$  Hz, 1H), 5.28 (q,  $J = 6.4$  Hz, 1H), 1.53 (d,  $J = 6.4$  Hz, 3H).

$^{13}\text{C}$  NMR (151 MHz,  $\text{CDCl}_3$ )  $\delta$  144.73, 132.78, 128.89, 127.98, 126.79, 121.84, 69.31, 23.70.

Spectral data match those previously reported.<sup>7</sup>

Enantiomer separation: SFC OJ-H column, 5% iPrOH in  $\text{scCO}_2$ , 2.5 mL/min flow rate.

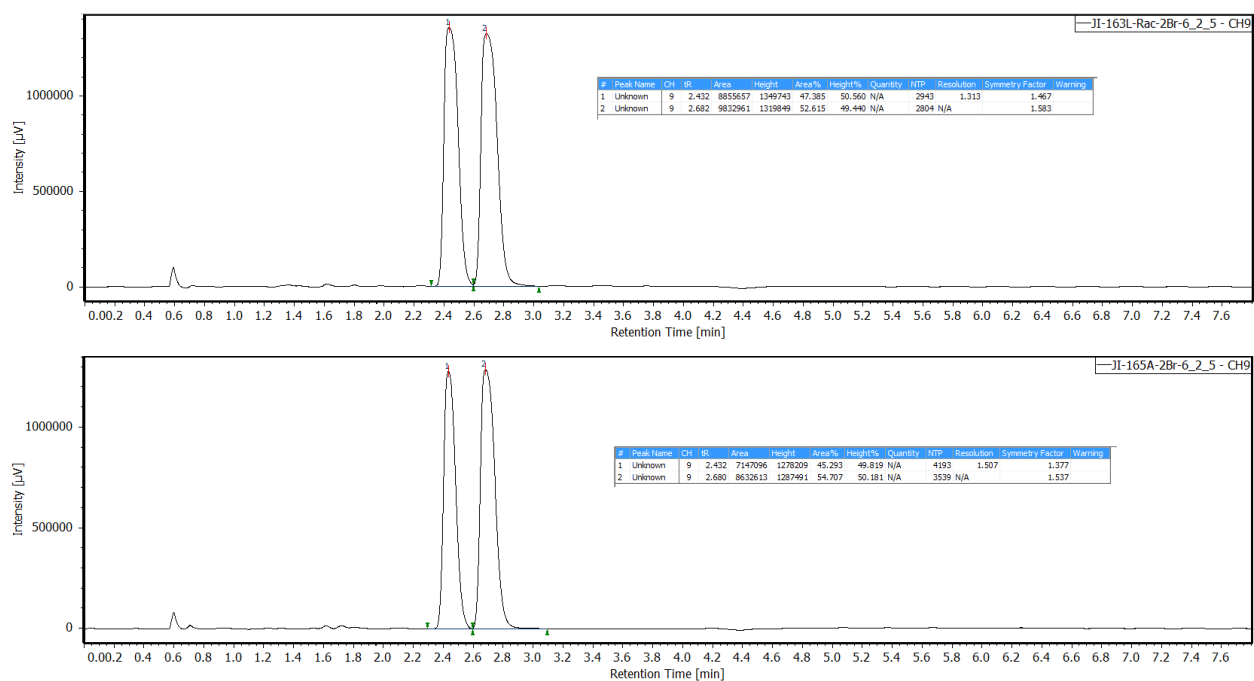

**Supplementary Figure 29.** SFC traces of the racemic 1-(2-bromophenyl)ethan-1-ol (top) and the enantioenriched products of the hCAII-catalyzed reduction (bottom).

## 7. QM/MM Study of hCAII Catalytic Intermediates

### 7.1 Complex of ZnOH-hCAII Docked by Phenylsilane

The binding mode of phenylsilane to the active site in ZnOH-hCAII was simulated in three steps. In step one, the starting structure for phenylsilane-hCAII complex was generated through docking. In step 2, the structure of the docking complex was equilibrated through Molecular Dynamics (MD). In step 3, the most frequent trajectory was further optimized through QM/MM calculations.

#### Generation of the initial structure with Glide Docking

Protein structure with the PDB code of 1BN1 was used as the starting structure for the calculations. Protein preparation module in Schrödinger<sup>17,18</sup> was used to correct errors in the crystal structure and add hydrogen atoms. The Hg ion coordinating to cysteine was replaced with two protons to ensure accuracy of the structure. Protonation states were simulated at pH of 7.0, and water molecules beyond 5 Å from the protein were deleted for clarity. The hydrogen-bonding interactions within the protein were optimized with the OPLS\_2005 force field<sup>19</sup> to generate an accurate structure for the protein receptor. Then, the native sulfamide anion was replaced with a hydroxide group, followed by receptor grid generation with a box length of 20 Å centering at the Zn atom.

The phenylsilane ligand was built and prepared with the same force field with the Ligprep module.<sup>20</sup> Docking of the ligands into the hCAII enzymatic active site was performed using the Glide Dock module in Maestro.<sup>21</sup> For optimization of the structure with the phenylsilane docked, the ligand was set to be flexible, and the docking was performed at the XP (extra precision) level with the same OPLS\_2005 force field.<sup>19</sup> The most stable docking complex was exported and used for the MD simulations.

#### Classical MD Simulations

MD simulations was performed using the Desmond program of the Schrödinger package.<sup>22,23</sup> Each protein was immersed in a pre-equilibrated truncated cubic box with a 10 Å buffer of TIP3P<sup>24</sup> water molecules using the System Builder panel of Desmond,<sup>21</sup> resulting in the addition of around 7,500 solvent molecules. The systems were neutral, therefore do not need the addition of explicit counter ions (Na<sup>+</sup> or Cl<sup>-</sup>). All subsequent calculations were done using the OPLS\_2005 force field.<sup>19</sup> The system was equilibrated in two stages. In the first stage, the systems were gently heated using six 50-ps steps, incrementing the temperature by 50 K for each step (0–300 K); The system was simulated with a weak restraint of 15 kcal/mol/Å on the solute using the NPT ensemble,<sup>25</sup> at the target temperature of 300 K and target pressure of 1.013 bar. In the second stage, the system was equilibrated for 1.2 ns without constraints. Trajectories were processed and analyzed using the

Trajectory Frame Clustering panel of Desmond.<sup>4</sup> The most populated conformational snapshot extracted from the classical MD trajectory was selected for the subsequent QM/MM simulations.

### QM/MM Simulations

QM/MM simulations were performed using the QSite program<sup>26-28</sup> in the Schrödinger package 2020-2. The QM/MM methodology (an additive scheme) with hydrogen caps on boundary QM atoms and electrostatic treatment at the interface between the QM and MM regions using Gaussian charge distributions represented on a grid was employed.<sup>9,10</sup> The QM region has 51 atoms in total, including the Zinc hydroxide (3 atoms), three histidine side chains (33 atoms), and the docked phenylsilane (15 atoms). The QM region was simulated with the (R)B3LYP functional,<sup>29,30</sup> with the Los Alamos National Laboratory effective core potential (LACVP\*) basis set.<sup>31,32</sup> In the LACVP\* basis set the valence electrons are described by the Pople's split-valence basis set 6-31G(d) augmented by polarization on all atoms.<sup>33</sup> MM calculations were conducted for all other atoms with the OPLS\_2005 force field with no cut-offs introduced for nonbonding interactions. No atom in the system was frozen or restrained during the optimization. Convergence thresholds for the energy and gradient change were set to be  $5 \times 10^{-5}$  Hartree and  $4.5 \times 10^{-4}$  Hartree·Bohr<sup>-1</sup>, respectively. The structure optimization for PhSiH<sub>3</sub>-ZnOH-hCAII converged with energy change of  $-3.4628 \times 10^{-5}$  hartree.

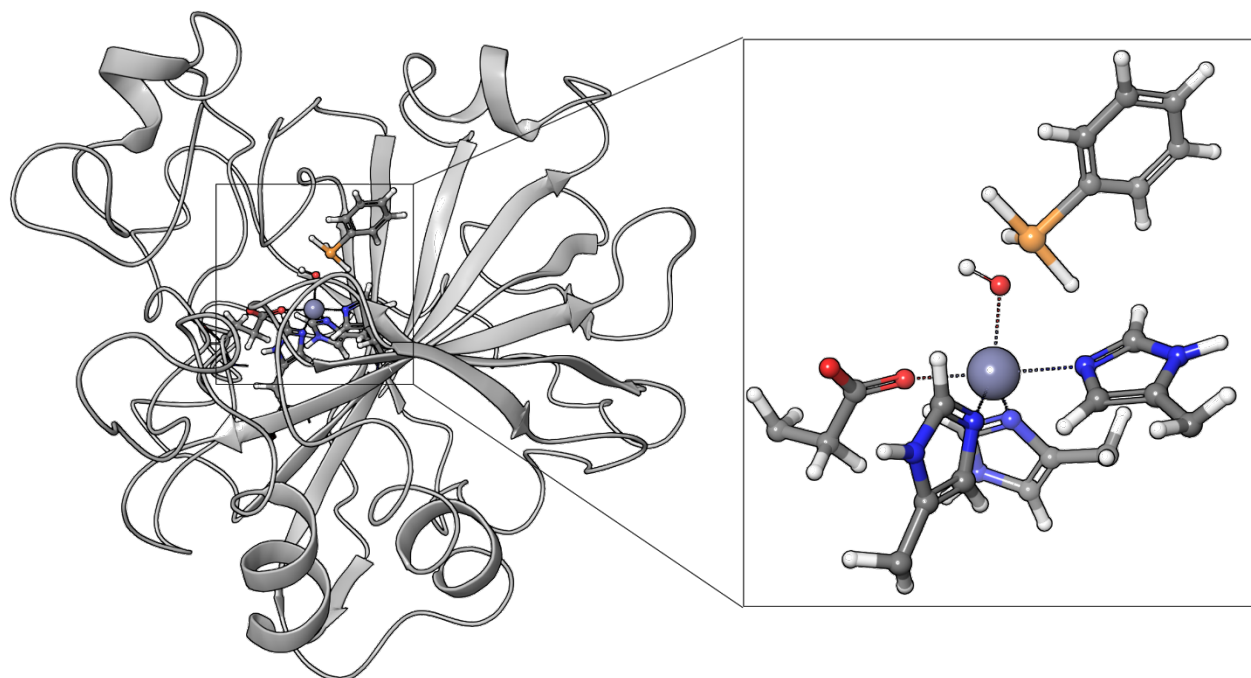

**Supplementary Figure 30.** Atoms in the QM region were shown in ball-and-stick format. All other atoms are in the MM region. The hanging bonds between C $\alpha$  and C $\beta$  of histidine were hydrogen-capped for QM/MM simulation.

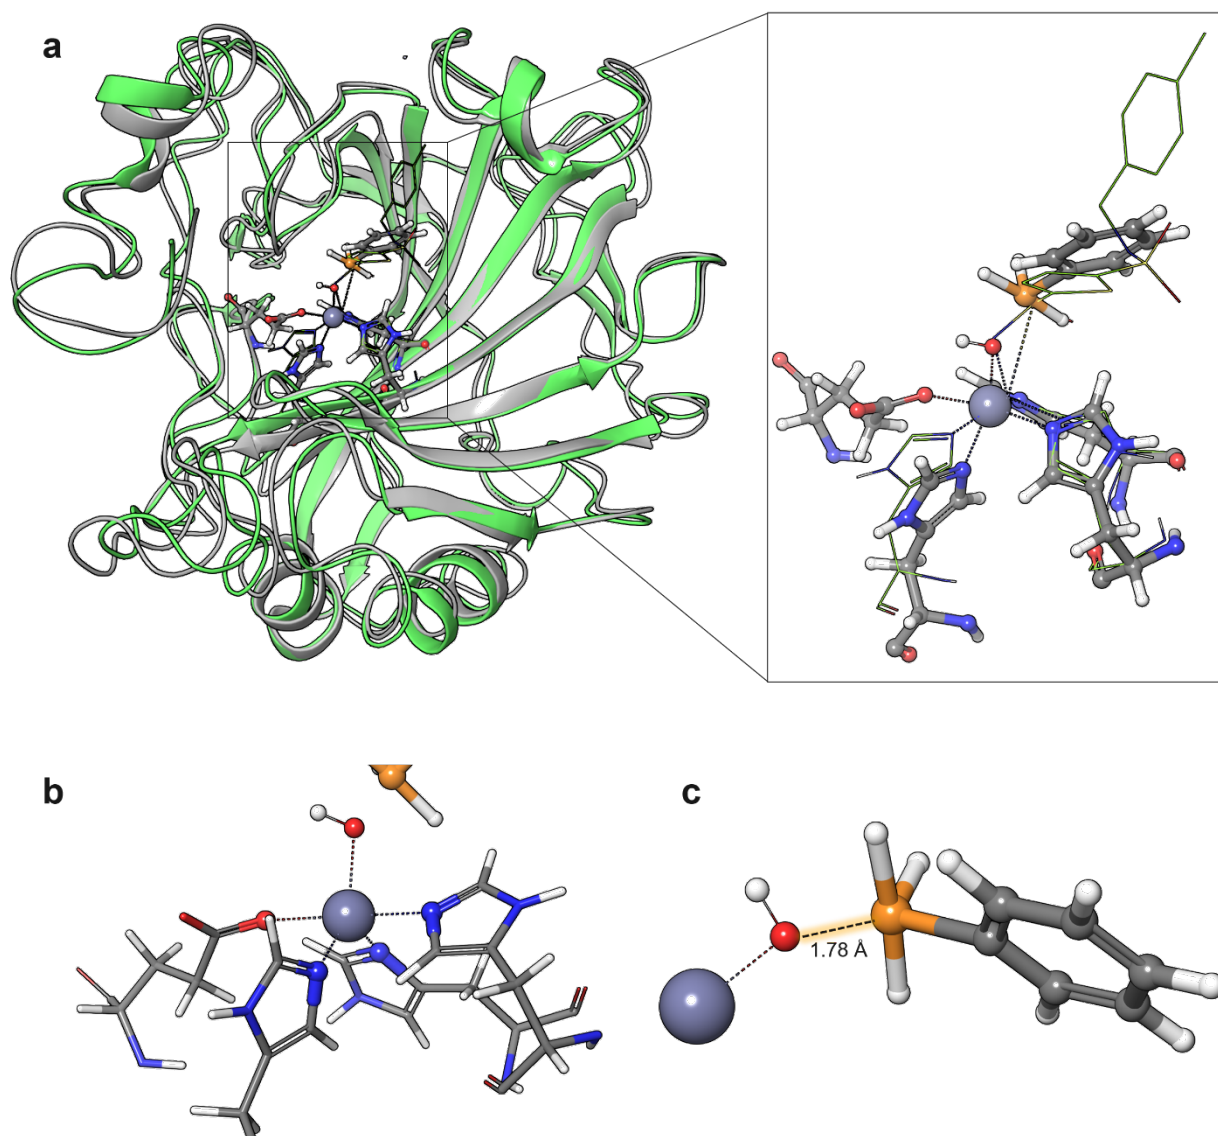

**Supplementary Figure 31.** (a) The structure of ZnOH-hCAII (gray) docked to phenylsilane optimized by QM/MM overlaid with the structure of hCAII bound by thiophene-2,5-disulfonic acid 2-amide-5-(4-methyl-benzylamide) as inhibitor (pdb 1BN1, green). The protein backbone of the two complexes are almost identical, indicating the QM/MM calculation well reproduced the protein structure. (b) The triangular bipyramidal geometry around Zn center. (c) The Si atom closely contacts the hydroxide group with a bond distance of 1.78 Å, forming a pentacoordinate trigonal bipyramidal silicon center.

## 7.2 Complex of ZnH-hCAII docked by acetophenone and 2'-Bromoacetophenone

The binding mode of acetophenones to the active site in ZnH-hCAII was simulated in three steps using almost identical procedure in simulating the complex of phenylsilane with ZnOH-hCAII. In step one, the starting structure for acetophenone-hCAII complex was generated through docking.

In step 2, the structure of the docking complex was equilibrated through Molecular Dynamics (MD). In step 3, the most frequent trajectory was further optimized through QM/MM calculations.

#### Generation of the initial structure with Glide docking

Protein structure with the PDB code of 1BN1 was used as the starting structure for the calculations. Protein preparation module in Schrödinger<sup>17,18</sup> was used to correct errors in the crystal structure and add hydrogen atoms. The Hg ion coordinating to cysteine was replaced with two protons to ensure accuracy of the structure. Protonation states were simulated at pH of 7.0, and water molecules beyond 5 Å from the protein were deleted for clarity. The hydrogen-bonding interactions within the protein were optimized with the OPLS\_2005 force field<sup>19</sup> to generate an accurate structure for the protein receptor. Then, the native sulfamide anion was replaced with a hydride, followed by receptor grid generation with a box length of 20 Å centering at the Zn atom.

The ligand was built and prepared with the same force field with the Ligprep module.<sup>20</sup> Docking of the ligands into the hCAII enzymatic active site was performed using the Glide Dock module in Maestro.<sup>21</sup> For optimization of the structure with the ketone docked, the ligand was set to be flexible, and the docking was performed at the XP (extra precision) level with the same OPLS\_2005 force field. The most stable docking complex was exported and used for the MD simulations.

#### Classical MD Simulations

MD simulations was performed using the Desmond program of the Schrödinger package.<sup>22,23</sup> Each protein was immersed in a pre-equilibrated truncated cubic box with a 10 Å buffer of TIP3P<sup>24</sup> water molecules using the System Builder panel of Desmond,<sup>21</sup> resulting in the addition of around 7,500 solvent molecules. The systems were neutral, therefore do not need the addition of explicit counter ions (Na<sup>+</sup> or Cl<sup>-</sup>). All subsequent calculations were done using the OPLS\_2005 force field.<sup>19</sup> The system was equilibrated in two stages. In the first stage, the systems were gently heated using six 50-ps steps, incrementing the temperature by 50 K for each step (0–300 K); The system was simulated with a weak restraint of 15 kcal/mol/Å on the solute using the NPT ensemble,<sup>25</sup> at the target temperature of 300 K and target pressure of 1.013 bar. In the second stage, the system was equilibrated for 1.2 ns without constraints. Trajectories were processed and analyzed using the Trajectory Frame Clustering panel of Desmond.<sup>4</sup> The most populated conformational snapshot extracted from the classical MD trajectory was selected for the subsequence QM/MM simulations.

#### QM/MM Calculations

QM/MM simulations were performed using the QSite program<sup>26-28</sup> in the Schrödinger package 2020-2. The QM/MM methodology (an additive scheme) with hydrogen caps on boundary QM atoms and electrostatic treatment at the interface between the QM and MM regions using

Gaussian charge distributions represented on a grid was employed.<sup>9,10</sup> The QM region has 52 atoms in total, including the Zinc hydride (2 atoms), three histidine side chains (33 atoms), and the docked acetophenone or 2'-bromoacetophenone (17 atoms). The QM region was simulated with the (R)B3LYP functional,<sup>29,30</sup> with the Los Alamos National Laboratory effective core potential (LACVP\*) basis set.<sup>31,32</sup> In the LACVP\* basis set the valence electrons are described by the Pople's split-valence basis set 6-31G(d) augmented by polarization on all atoms.<sup>33</sup> MM calculations were conducted for all other atoms with the OPLS\_2005 force field with no cut-offs introduced for nonbonding interactions. No atom in the system was frozen or restrained during the optimization. Convergence thresholds for the energy and gradient change were set to be  $5 \times 10^{-5}$  Hartree and  $4.5 \times 10^{-4}$  Hartree·Bohr<sup>-1</sup>, respectively. The structure optimization of acetophenone-ZnH-hCAII converged with energy change of  $-3.0778 \times 10^{-5}$  Hartree.

The optimized structure contains a strong hydrogen-bonding interaction of the carbonyl group to the amide N-H of Thr199, with a bond distance of 2.28 Å. The Thr199 amide N-H is the major functional group in the binding site of the the native enzyme interacting with carbon dioxide, the native substrate. The ketone was placed in an ideal geometry for concerted hydride and proton transfer to form the corresponding (S)-1-phenylethan-1-ol.

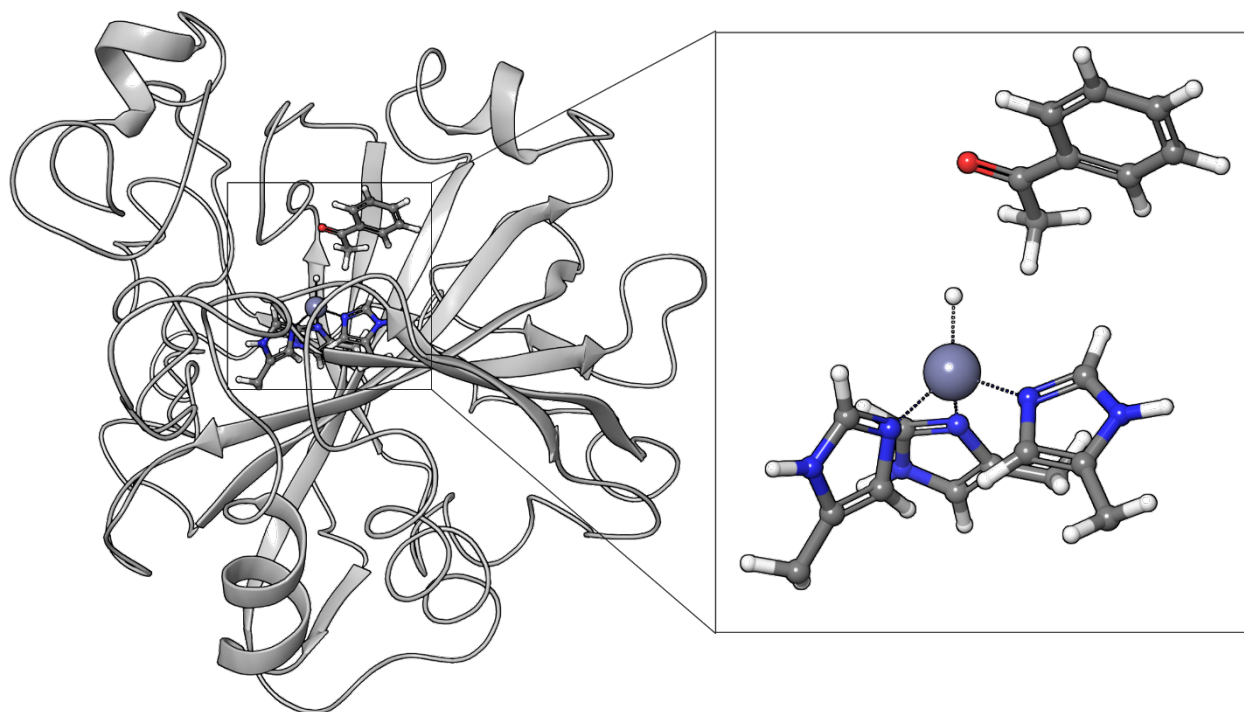

**Supplementary Figure 32.** Atoms in the QM region were shown in ball-and-stick format. All other atoms are in the MM region. The hanging bonds between C $\alpha$  and C $\beta$  of histadine were hydrogen-capped for QM/MM simulation.

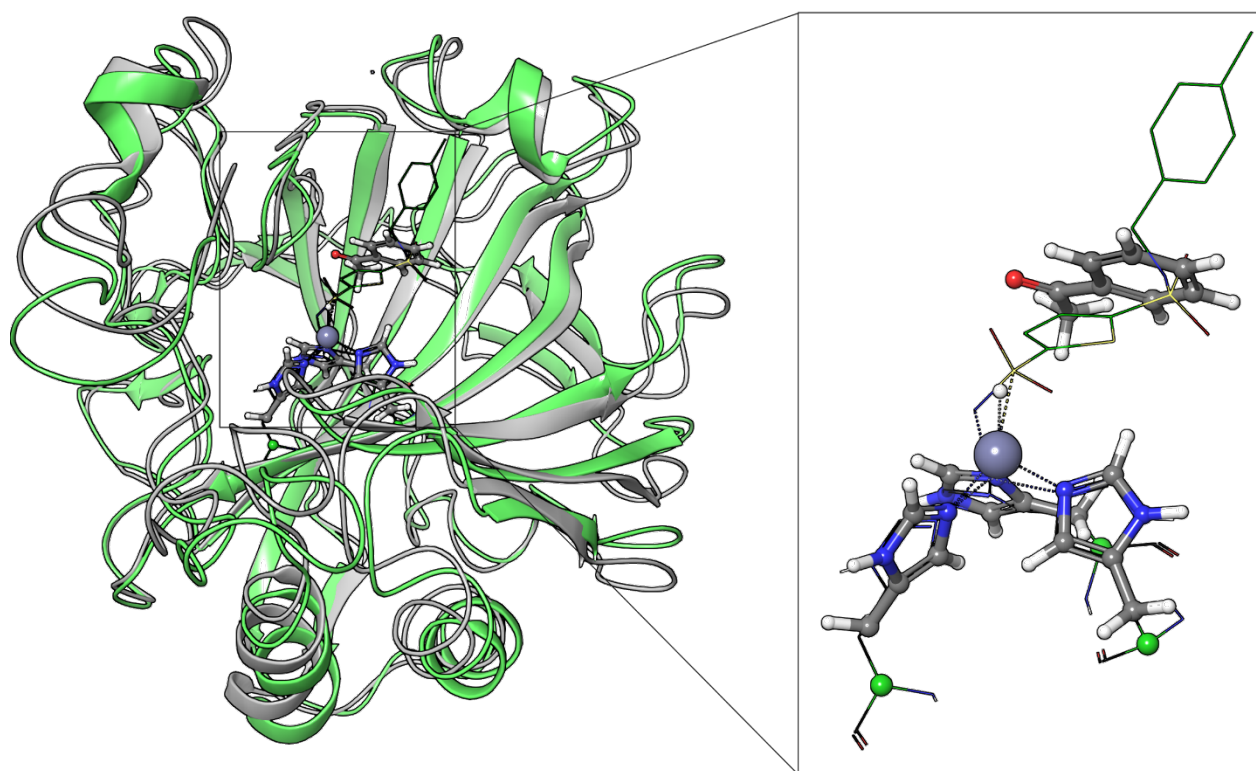

**Supplementary Figure 33.** The structure of ZnH-hCAII (gray) docked with acetophenone optimized by QM/MM overlaid with hCAII bound by thiophene-2,5-disulfonic acid 2-amide-5-(4-methyl-benzylamide) as inhibitor (pdb 1BN1, green). The protein backbone of the two complexes are almost identical, indicating the QM/MM calculation well reproduced the protein structure. A more detailed figure showing the accurate interactions of acetophenone with neighboring residues was included in Figure 4c.

### 7.3 Cartesian coordinates QM/MM optimized structures in xyz format

hCAII-ZnOH-PhSiH<sub>3</sub> (QM region + Hydrogen Cap)

| atom | x             | y            | z            |
|------|---------------|--------------|--------------|
| C1   | -1.5314610264 | 5.8304157448 | 0.4568552644 |
| N2   | -0.7843192035 | 4.8768752071 | 1.0313055561 |
| C3   | -0.4676158868 | 4.7822335896 | 2.4511338982 |
| C4   | 0.8552285102  | 4.0204787740 | 2.6249591689 |

|     |               |               |              |
|-----|---------------|---------------|--------------|
| O5  | 1.0867675528  | 3.0165166717  | 1.9497163765 |
| C6  | -1.6609016778 | 4.1377648453  | 3.2107019052 |
| C7  | -1.9923868313 | 2.7174595248  | 2.8820810344 |
| N8  | -2.9190803073 | 2.3083663789  | 1.9412669331 |
| C9  | -1.5180298326 | 1.5608950171  | 3.4416086306 |
| C10 | -2.9662664827 | 0.9536923342  | 1.9629384733 |
| N11 | -2.1193531924 | 0.4651156189  | 2.8618318281 |
| H12 | -0.3701994312 | 4.1801496571  | 0.4269236446 |
| H13 | -0.3126357305 | 5.7949576168  | 2.8352979578 |
| H14 | -2.5201590685 | 4.7912785717  | 3.0499873457 |
| H15 | -1.4340279382 | 4.1883231570  | 4.2813733936 |
| H16 | -3.4576094406 | 2.9275411720  | 1.3300132842 |
| H17 | -0.7647367535 | 1.4606132328  | 4.2050998392 |
| H18 | -3.6040528443 | 0.3642000452  | 1.3213125679 |
| N19 | 1.6992533204  | 4.4680469558  | 3.5640807953 |
| C20 | 2.6521581224  | 2.8896609780  | 5.2111243979 |
| N21 | 3.6460030506  | 2.0467670367  | 5.5296870068 |
| C22 | 3.7099107531  | 1.1581279496  | 6.6831787798 |
| C23 | 5.1084691383  | 1.2152789807  | 7.3079014872 |
| O24 | 6.0777518744  | 1.5271443158  | 6.6201628218 |
| C25 | 3.2898266710  | -0.2892639666 | 6.3009935436 |
| C26 | 1.8702569535  | -0.4503909674 | 5.8547471217 |
| N27 | 0.7802405819  | -0.3248088764 | 6.6987284735 |
| C28 | 1.3444259710  | -0.7659021605 | 4.6260345674 |
| C29 | -0.3371399329 | -0.5446389084 | 5.9842626578 |
| N30 | -0.0360464960 | -0.8168559816 | 4.7211233355 |
| H31 | 4.4791738340  | 2.0860144471  | 4.9582526301 |
| H32 | 3.0289766683  | 1.5370743808  | 7.4466188687 |
| H33 | 3.4934817755  | -0.9556798838 | 7.1513084904 |
| H34 | 3.9439893911  | -0.6123158755 | 5.4880385490 |
| H35 | 0.7875290200  | -0.0437533587 | 7.6810347531 |
| H36 | 1.8696158050  | -0.9537638964 | 3.6982841286 |
| H37 | -1.3260146658 | -0.4964552164 | 6.4153022776 |
| N38 | 5.1921026496  | 0.9520490674  | 8.6198880561 |
| C39 | 4.9046627121  | -5.6458877334 | 5.8816846207 |
| N40 | 3.7715354592  | -5.5719635593 | 5.1576695325 |
| C41 | 2.6434094720  | -6.5006629376 | 5.2267414137 |



|      |               |               |               |
|------|---------------|---------------|---------------|
| C42  | 3.0409920951  | -7.8534881991 | 4.5950895561  |
| O43  | 2.9330448899  | -8.8945789150 | 5.2427744841  |
| C44  | 1.3972534336  | -5.8855270874 | 4.5204647796  |
| C45  | 1.0092116223  | -4.3984818441 | 4.7800374862  |
| C46  | -0.4993555044 | -4.2534165670 | 5.1611658791  |
| O47  | -1.1942682585 | -3.3692261387 | 4.5555468261  |
| O48  | -0.9204610105 | -5.0256422158 | 6.0543477902  |
| H49  | 3.6756453832  | -4.8224837414 | 4.4925504881  |
| H50  | 2.4019782095  | -6.6491303333 | 6.2797781003  |
| H51  | 0.5500161207  | -6.5047063894 | 4.8411884669  |
| H52  | 1.5063724490  | -6.0238040612 | 3.4346782643  |
| H53  | 1.2590617196  | -3.7811427326 | 3.9149538084  |
| H54  | 1.5679199083  | -3.9616591070 | 5.6117918132  |
| N55  | 3.6017893529  | -7.8201664038 | 3.3711252386  |
| C56  | 3.0448604756  | 0.7479247978  | -0.3807262343 |
| N57  | 1.7958230280  | 1.2414522984  | -0.4028803808 |
| C58  | 0.5921942528  | 0.6412779571  | -0.9683609103 |
| C59  | -0.1860545701 | 1.7318681208  | -1.7126027206 |
| O60  | -1.0161949473 | 2.4153897473  | -1.1144846852 |
| C61  | -0.2253921058 | -0.0618774577 | 0.1520690582  |
| C62  | 0.1396968764  | -1.4866150803 | 0.4485172765  |
| N63  | -0.4220338883 | -2.1651647100 | 1.5321271432  |
| C64  | 0.9496522200  | -2.3620435817 | -0.2147268149 |
| C65  | 0.0733898314  | -3.4006885937 | 1.5036674871  |
| N66  | 0.8848323551  | -3.5542459552 | 0.4519673057  |
| H67  | 1.6741989679  | 2.1665693447  | -0.0137022288 |
| H68  | 0.8686045848  | -0.0854087192 | -1.7353930184 |
| H69  | -1.2906846091 | -0.0316965295 | -0.1181720076 |
| H70  | -0.1281201202 | 0.5588298231  | 1.0477136492  |
| H71  | 1.6392134772  | -2.2379512203 | -1.0274256808 |
| H72  | -0.1734830150 | -4.1718879211 | 2.2135040122  |
| H73  | 1.5650742687  | -4.2985729853 | 0.2890593785  |
| N74  | 0.1016383851  | 1.8785959728  | -3.0170923385 |
| Zn75 | -1.4114996316 | -1.6091719965 | 3.2739904247  |
| Si76 | -4.8627898768 | -2.5978670959 | 2.1114259364  |
| C77  | -6.5172157269 | -1.6964923583 | 1.7029687100  |
| C78  | -7.5660650157 | -1.5654471651 | 2.6299451749  |

|     |               |               |               |
|-----|---------------|---------------|---------------|
| C79 | -8.7567441106 | -0.9095664113 | 2.3048114182  |
| C80 | -8.9393951509 | -0.3886110665 | 1.0214805854  |
| C81 | -7.9186878135 | -0.5166716365 | 0.0741144904  |
| C82 | -6.7207523606 | -1.1471475048 | 0.4234149414  |
| H83 | -9.8695965564 | 0.1136876031  | 0.7626188687  |
| O84 | -3.5116283747 | -2.1465517146 | 3.1665495528  |
| H85 | -4.8828209006 | -4.0454239207 | 1.4869064172  |
| H86 | -4.0971260514 | -2.0024361866 | 0.9375294696  |
| H87 | -5.5210087969 | -3.2039753515 | 3.4360986800  |
| H88 | -7.4562269855 | -1.9817380372 | 3.6267822681  |
| H89 | -9.5383157411 | -0.8115570748 | 3.0552508564  |
| H90 | -8.0595461314 | -0.1293610103 | -0.9322223567 |
| H91 | -5.9218678904 | -1.2240491034 | -0.3120336923 |
| H92 | -3.6237168244 | -2.5942901038 | 4.0211783563  |
| H93 | -0.8102270199 | 4.5971964691  | 2.6692178287  |
| H94 | 3.5892980010  | 0.7425589483  | 6.5734473828  |
| H95 | 2.2856184587  | -6.3240477527 | 5.0239582752  |
| H96 | 0.3574523404  | 0.4393909697  | -0.6466678307 |

#### hCAII-ZnH-PhC(O)Me (QM region + Hydrogen cap)

| atom | x             | y            | z            |
|------|---------------|--------------|--------------|
| C1   | -3.7127176766 | 4.6581194448 | 6.5755158970 |
| N2   | -3.9698714984 | 3.7918261017 | 5.5851812576 |
| C3   | -5.1905959921 | 3.7747175717 | 4.7917369740 |
| C4   | -5.4496887446 | 2.3909997381 | 4.1848373791 |
| O5   | -4.5174479155 | 1.7062407733 | 3.7650462567 |
| C6   | -5.1822941475 | 4.8840690485 | 3.7050346097 |
| C7   | -4.0610223285 | 4.8127964759 | 2.7213690152 |
| N8   | -2.8818851787 | 5.5155723652 | 2.8745848791 |
| C9   | -3.9015987791 | 4.0865545869 | 1.5700987092 |
| C10  | -2.0692165181 | 5.1958650537 | 1.8444472132 |
| N11  | -2.6542557790 | 4.3261215050 | 1.0362006669 |
| H12  | -3.2907018993 | 3.0632714230 | 5.4089448668 |
| H13  | -6.0273636038 | 3.9695146157 | 5.4700540448 |
| H14  | -5.1449379134 | 5.8352722078 | 4.2350026279 |
| H15  | -6.1418946871 | 4.8475176080 | 3.1809973502 |

|     |               |               |               |
|-----|---------------|---------------|---------------|
| H16 | -2.6700323419 | 6.1951316503  | 3.6099858001  |
| H17 | -4.5922139247 | 3.3987565177  | 1.1059227777  |
| H18 | -1.0850161018 | 5.6175425699  | 1.7082825989  |
| N19 | -6.7323546432 | 2.0334783113  | 4.0472689467  |
| C20 | -7.3122360132 | 1.1258844686  | 1.8290921326  |
| N21 | -7.3093232607 | 0.0412035911  | 1.0394632889  |
| C22 | -7.7510512642 | 0.0026595750  | -0.3492929400 |
| C23 | -8.6142149069 | -1.2492949590 | -0.5275322018 |
| O24 | -8.1590407056 | -2.3440646945 | -0.2081170024 |
| C25 | -6.5898110841 | 0.0150131132  | -1.3777282695 |
| C26 | -5.7065444532 | 1.2231621491  | -1.3795367941 |
| N27 | -5.8285971527 | 2.2567980054  | -2.2815373474 |
| C28 | -4.5302176860 | 1.4652970800  | -0.7212438289 |
| C29 | -4.7523528782 | 3.0531455648  | -2.1774364921 |
| N30 | -3.9304758710 | 2.6070319709  | -1.2308322127 |
| H31 | -7.2296881860 | -0.8536836774 | 1.5041778299  |
| H32 | -8.3926269325 | 0.8661177310  | -0.5375749493 |
| H33 | -6.9917467654 | -0.1210644669 | -2.3846529661 |
| H34 | -5.9608391525 | -0.8582037258 | -1.1822331143 |
| H35 | -6.5773243043 | 2.3842657227  | -2.9698971443 |
| H36 | -4.0526428888 | 0.8480674285  | 0.0229992702  |
| H37 | -4.6065677251 | 3.9300191028  | -2.7882775744 |
| N38 | -9.8356477739 | -1.0771639628 | -1.0472565440 |
| C39 | -2.8314372725 | -1.7458117840 | 3.8594039760  |
| N40 | -2.4929948439 | -0.4440190885 | 3.8809640573  |
| C41 | -1.1521409103 | 0.1321181767  | 3.7558079517  |
| C42 | -0.8431143073 | 0.8774408530  | 5.0635291901  |
| O43 | -1.5516241605 | 1.8265946142  | 5.4010164282  |
| C44 | -1.1202118718 | 1.1730502115  | 2.5999376855  |
| C45 | -1.1850430475 | 0.5377630325  | 1.2349701095  |
| N46 | -1.3835353463 | 1.2873933541  | 0.0738288270  |
| C47 | -1.1473795901 | -0.7867140165 | 0.8735665420  |
| C48 | -1.4939520478 | 0.3990361251  | -0.9244123625 |
| N49 | -1.3410222852 | -0.8445197004 | -0.4771190785 |
| H50 | -3.2224449979 | 0.2052948750  | 4.1409511425  |
| H51 | -0.3919028175 | -0.6359343003 | 3.6024882052  |
| H52 | -0.2082496273 | 1.7867427294  | 2.6937819688  |

|      |               |               |               |
|------|---------------|---------------|---------------|
| H53  | -1.9683812120 | 1.8534909510  | 2.7315850559  |
| H54  | -1.0393115596 | -1.6923892534 | 1.4446960741  |
| H55  | -1.7575065597 | 0.6094122348  | -1.9496519258 |
| H56  | -1.5886109458 | -1.7420670245 | -1.0078123973 |
| N57  | 0.2306798999  | 0.4757761172  | 5.7620533975  |
| Zn58 | -1.9804515576 | 3.1799464883  | -0.6752167282 |
| C59  | 1.5220417874  | 6.0163179244  | -1.5476720056 |
| C60  | 1.4236996431  | 7.3618600603  | -0.9009273805 |
| C61  | 1.6947827242  | 7.5696998127  | 0.4614906501  |
| C62  | 1.6373498868  | 8.8533846555  | 1.0036575743  |
| C63  | 1.3036476528  | 9.9414919148  | 0.1937287153  |
| C64  | 1.0244628624  | 9.7424404032  | -1.1623275970 |
| C65  | 1.0892332919  | 8.4635000250  | -1.7076566669 |
| H66  | 1.2667911944  | 10.9413826559 | 0.6191099958  |
| H67  | -0.8095141582 | 4.0898925381  | -1.5030152020 |
| O68  | 1.2484556523  | 5.8829843508  | -2.7363909792 |
| H69  | 1.9533781157  | 6.7368636339  | 1.1065316020  |
| H70  | 1.8749419228  | 9.0042610377  | 2.0532373319  |
| H71  | 0.7551209538  | 10.5818678484 | -1.7970409245 |
| H72  | 0.8857612319  | 8.3037209295  | -2.7605884990 |
| C73  | 1.9589059409  | 4.8176300615  | -0.7414105142 |
| H74  | 1.0447350097  | 4.3286886887  | -0.3749074801 |
| H75  | 2.4494075518  | 4.0979285723  | -1.4030034433 |
| H76  | 2.6204905867  | 5.0533639827  | 0.0942763238  |
| H77  | -5.1882124018 | 4.0932298420  | 4.4797276204  |
| H78  | -7.4176409305 | 0.0062064703  | -0.6445729108 |
| H79  | -1.1429735808 | 0.4309861483  | 3.4239394047  |

**hCAII-ZnH-2BrPhC(O)Me conformation 1 (QM region + Hydrogen cap)**

| atom | x             | y            | z            |
|------|---------------|--------------|--------------|
| C1   | -3.8155947354 | 4.3345596147 | 6.6496642754 |
| N2   | -4.0829396701 | 3.4330615034 | 5.6917719480 |
| C3   | -5.3019934282 | 3.4127239276 | 4.8897602422 |
| C4   | -5.5655529126 | 2.0267223836 | 4.2798730665 |
| O5   | -4.6372773768 | 1.3554645627 | 3.8282447650 |
| C6   | -5.2978445031 | 4.5227743244 | 3.8039264083 |

|     |                |               |               |
|-----|----------------|---------------|---------------|
| C7  | -4.1340643160  | 4.5110144007  | 2.8706064122  |
| N8  | -3.0291156699  | 5.3240664155  | 3.0396555015  |
| C9  | -3.8852754429  | 3.7900299324  | 1.7334367678  |
| C10 | -2.1696922769  | 5.0709832566  | 2.0270777860  |
| N11 | -2.6577332128  | 4.1446139871  | 1.2179121745  |
| H12 | -3.4356159905  | 2.6644737047  | 5.5764881357  |
| H13 | -6.1392742896  | 3.6093604755  | 5.5669851135  |
| H14 | -5.3150026115  | 5.4723249513  | 4.3371971388  |
| H15 | -6.2323976080  | 4.4480480575  | 3.2361700016  |
| H16 | -2.8879913487  | 6.0111740446  | 3.7820880333  |
| H17 | -4.4947147294  | 3.0280912183  | 1.2707195256  |
| H18 | -1.2206848031  | 5.5733611093  | 1.9117833852  |
| N19 | -6.8496128915  | 1.6526206897  | 4.1733100514  |
| C20 | -7.5194169616  | 0.7665318551  | 1.9609979744  |
| N21 | -7.6979535116  | -0.3029654928 | 1.1675427992  |
| C22 | -7.8514047782  | -0.3093989757 | -0.2859874336 |
| C23 | -8.7443620977  | -1.4944371460 | -0.6885805715 |
| O24 | -8.2378340254  | -2.5221759920 | -1.1384206239 |
| C25 | -6.4631334361  | -0.3012066344 | -1.0028611846 |
| C26 | -5.6474609063  | 0.9531694187  | -1.0113800483 |
| N27 | -5.9421266744  | 2.0990688560  | -1.7272068366 |
| C28 | -4.3616487856  | 1.1338341429  | -0.5754982193 |
| C29 | -4.8659133630  | 2.9060563891  | -1.7271637781 |
| N30 | -3.8718556332  | 2.3540313371  | -1.0316855577 |
| H31 | -7.7906156831  | -1.1983747108 | 1.6284707148  |
| H32 | -8.4014937801  | 0.5859943620  | -0.5726787374 |
| H33 | -6.5791209189  | -0.6135376859 | -2.0435887120 |
| H34 | -5.8449069868  | -1.0875465684 | -0.5739272543 |
| H35 | -6.8130731494  | 2.3097714456  | -2.2167000333 |
| H36 | -3.7600165208  | 0.4001273249  | -0.0639988905 |
| H37 | -4.8503759947  | 3.8652979155  | -2.2227251393 |
| N38 | -10.0629858389 | -1.3318973147 | -0.5052117618 |
| C39 | -2.7761025601  | -1.9415758827 | 3.8678628208  |
| N40 | -2.4397833893  | -0.6426023551 | 3.9738235229  |
| C41 | -1.1065234827  | -0.0426557224 | 3.8558621593  |
| C42 | -0.8272569340  | 0.6708506934  | 5.1898715593  |
| O43 | -1.5045851069  | 1.6503724294  | 5.5015262962  |

|      |               |               |               |
|------|---------------|---------------|---------------|
| C44  | -1.0852194891 | 1.0283302397  | 2.7240109230  |
| C45  | -1.0370655639 | 0.4479771879  | 1.3347974828  |
| N46  | -1.2235575530 | 1.2355574627  | 0.1929663694  |
| C47  | -0.9503511798 | -0.8575973129 | 0.9270046136  |
| C48  | -1.3004892791 | 0.3739409077  | -0.8316954766 |
| N49  | -1.1053773546 | -0.8757470977 | -0.4307686801 |
| H50  | -3.1456875544 | -0.0324273293 | 4.3632556899  |
| H51  | -0.3320724599 | -0.7965696762 | 3.6972972445  |
| H52  | -0.2338476827 | 1.7112684367  | 2.8886515881  |
| H53  | -1.9914071405 | 1.6352707555  | 2.8317292633  |
| H54  | -0.8652513014 | -1.7838471116 | 1.4664277500  |
| H55  | -1.6003978912 | 0.5940660174  | -1.8442990845 |
| H56  | -1.4774663128 | -1.7274301460 | -0.9629189081 |
| N57  | 0.1754623141  | 0.2021177506  | 5.9500506863  |
| Zn58 | -1.9492263289 | 3.0699567478  | -0.5360783022 |
| C59  | 1.4300982982  | 6.3198351821  | -1.7150383599 |
| C60  | 1.3818660929  | 7.7943118433  | -1.3685054215 |
| C61  | 1.4590125057  | 8.4062481932  | -0.1075969494 |
| C62  | 1.4489614672  | 9.7930878790  | 0.0438122866  |
| C63  | 1.3570772257  | 10.6121012484 | -1.0797828486 |
| C64  | 1.2632369812  | 10.0400306973 | -2.3486665559 |
| C65  | 1.2777660246  | 8.6575522139  | -2.4799071511 |
| H66  | 1.3423473995  | 11.6914291973 | -0.9526184837 |
| H67  | -0.8234096728 | 4.0915060053  | -1.3456285891 |
| O68  | 1.0737653041  | 5.9893720814  | -2.8388772354 |
| Br69 | 1.5078659323  | 7.4043997594  | 1.5818461559  |
| H70  | 1.5036551836  | 10.2250772740 | 1.0370818699  |
| H71  | 1.1580516965  | 10.6580028095 | -3.2339287506 |
| H72  | 1.1952720017  | 8.2060058341  | -3.4612000823 |
| C73  | 1.9631612271  | 5.2628529692  | -0.7810337729 |
| H74  | 1.1316267689  | 4.8815865173  | -0.1744036973 |
| H75  | 2.3043375165  | 4.4207459629  | -1.3882381054 |
| H76  | 2.7656639095  | 5.6115003741  | -0.1286632559 |
| H77  | -5.3008022065 | 3.7314368688  | 4.5780002574  |
| H78  | -7.4528102244 | -0.3070468256 | -0.4918131712 |
| H79  | -1.1004067708 | 0.2648412047  | 3.5308898539  |

hCAII-ZnH-2BrPhC(O)Me conformation 2 (QM region + Hydrogen cap)

| atom | x              | y             | z             |
|------|----------------|---------------|---------------|
| C1   | -11.9466917703 | 0.6806996591  | 10.4684354225 |
| N2   | -11.3898287262 | -0.3519444007 | 11.1082217024 |
| C3   | -10.5084661439 | -1.3504828606 | 10.5203097741 |
| C4   | -10.6872963461 | -2.7032393347 | 11.2252031395 |
| O5   | -11.2173774842 | -2.7552940132 | 12.3360286561 |
| C6   | -9.0410813809  | -0.8543210853 | 10.4950051538 |
| C7   | -8.4102723944  | -0.6390898478 | 11.8271348590 |
| N8   | -8.5163957171  | 0.5588028760  | 12.5054142442 |
| C9   | -7.6680593603  | -1.4517701307 | 12.6440120220 |
| C10  | -7.8521183469  | 0.4448350178  | 13.6774895562 |
| N11  | -7.3339253908  | -0.7705173696 | 13.7985930754 |
| H12  | -11.6183996526 | -0.4868978784 | 12.0932416842 |
| H13  | -10.8342563121 | -1.5069007343 | 9.4883414064  |
| H14  | -9.0524293638  | 0.0842605634  | 9.9383922725  |
| H15  | -8.4454072714  | -1.5527478588 | 9.9083286539  |
| H16  | -8.9712449299  | 1.4036984523  | 12.1427814614 |
| H17  | -7.3686577792  | -2.4773264625 | 12.4872619322 |
| H18  | -7.7659678497  | 1.2409828922  | 14.4029417811 |
| N19  | -10.2318372966 | -3.7882075166 | 10.5932185447 |
| C20  | -8.8256942756  | -5.6535482317 | 11.3137003858 |
| N21  | -8.6054039146  | -6.4690670286 | 12.3464781814 |
| C22  | -7.4625413812  | -7.3557399940 | 12.5170208531 |
| C23  | -7.9817134502  | -8.7967402447 | 12.3719715511 |
| O24  | -9.1211646947  | -9.0623896821 | 12.7597255628 |
| C25  | -6.8584479851  | -7.1892733296 | 13.9377457713 |
| C26  | -6.3290663765  | -5.8014400548 | 14.1547354946 |
| N27  | -5.0430064782  | -5.3903705375 | 13.8565619295 |
| C28  | -6.9560648804  | -4.6699734211 | 14.6120454837 |
| C29  | -4.9336379856  | -4.0749484735 | 14.1362579891 |
| N30  | -6.0810979730  | -3.5997038874 | 14.5953755370 |
| H31  | -9.3704843382  | -6.6121377233 | 13.0060125152 |
| H32  | -6.7152630035  | -7.1586942269 | 11.7527203847 |
| H33  | -6.0731659039  | -7.9378980034 | 14.0945605666 |
| H34  | -7.6475768731  | -7.3895148968 | 14.6687210221 |

|      |                |               |               |
|------|----------------|---------------|---------------|
| H35  | -4.2642870258  | -5.9618019615 | 13.5335869992 |
| H36  | -7.9793117476  | -4.5637731780 | 14.9402587358 |
| H37  | -4.0173657942  | -3.5176005306 | 14.0200870241 |
| N38  | -7.1824476206  | -9.7111631252 | 11.8136433323 |
| C39  | -12.7677366540 | -3.8816939440 | 15.4110190448 |
| N40  | -12.0436335212 | -2.8444225877 | 14.9870224345 |
| C41  | -11.7384054957 | -1.6412535308 | 15.7391637418 |
| C42  | -12.4283866107 | -0.4665941974 | 15.0320323396 |
| O43  | -12.0846797582 | -0.1393343553 | 13.8958975926 |
| C44  | -10.2041722691 | -1.4227534682 | 15.7351396790 |
| C45  | -9.4744619789  | -2.3610235835 | 16.6563170604 |
| N46  | -8.0889945292  | -2.3856193736 | 16.7106565138 |
| C47  | -9.9510552323  | -3.2648514239 | 17.5730303583 |
| C48  | -7.7571582272  | -3.2730515230 | 17.6437244303 |
| N49  | -8.8568317381  | -3.8213112016 | 18.1879714299 |
| H50  | -11.7494494935 | -2.8382244943 | 14.0085374389 |
| H51  | -12.1079331886 | -1.6948095358 | 16.7644008926 |
| H52  | -9.9705082821  | -0.3861952192 | 16.0107877807 |
| H53  | -9.8518873133  | -1.5518484327 | 14.7063771267 |
| H54  | -10.9480412843 | -3.5637483534 | 17.8453245747 |
| H55  | -6.7496071348  | -3.5124453600 | 17.9429368687 |
| H56  | -8.9292628712  | -4.5866894776 | 18.8924372455 |
| N57  | -13.4055751196 | 0.1561214931  | 15.6948607905 |
| Zn58 | -6.3973880593  | -1.6812143995 | 15.5192783051 |
| C59  | -6.1479869174  | 2.4664472022  | 16.5138472244 |
| C60  | -5.2776332204  | 3.4026580137  | 15.7067997745 |
| C61  | -5.7520945047  | 4.7188263490  | 15.5749527425 |
| C62  | -5.0302828527  | 5.6867365747  | 14.8848735587 |
| C63  | -3.8105758295  | 5.3468995377  | 14.2959474932 |
| C64  | -3.3297978333  | 4.0405896073  | 14.3885555811 |
| C65  | -4.0626490932  | 3.0795681790  | 15.0864537892 |
| H66  | -3.2412127313  | 6.0915441925  | 13.7461362684 |
| H67  | -5.3536838064  | -0.8505845712 | 16.4287502627 |
| O68  | -7.3455199402  | 2.4159071998  | 16.2759453192 |
| H69  | -6.6950507686  | 4.9697362968  | 16.0458053511 |
| H70  | -5.4266412873  | 6.6926591528  | 14.7958741881 |
| H71  | -2.3984854045  | 3.7525344118  | 13.9136358203 |



|      |                |               |               |
|------|----------------|---------------|---------------|
| Br72 | -3.4233818903  | 1.2458494814  | 15.0587905143 |
| C73  | -5.5871104662  | 1.7412053680  | 17.7171859323 |
| H74  | -6.0547711879  | 0.7592289150  | 17.8043558392 |
| H75  | -4.5059835723  | 1.6129500582  | 17.6746537039 |
| H76  | -5.8593832941  | 2.3486577072  | 18.5925387499 |
| H77  | -10.0871568817 | -1.2080270053 | 10.5130444193 |
| H78  | -7.2890966587  | -7.3079447945 | 12.9249333395 |
| H79  | -11.2979029873 | -1.5785187236 | 15.7380083700 |

## 8. NMR Spectra

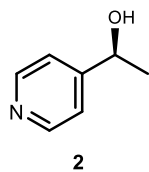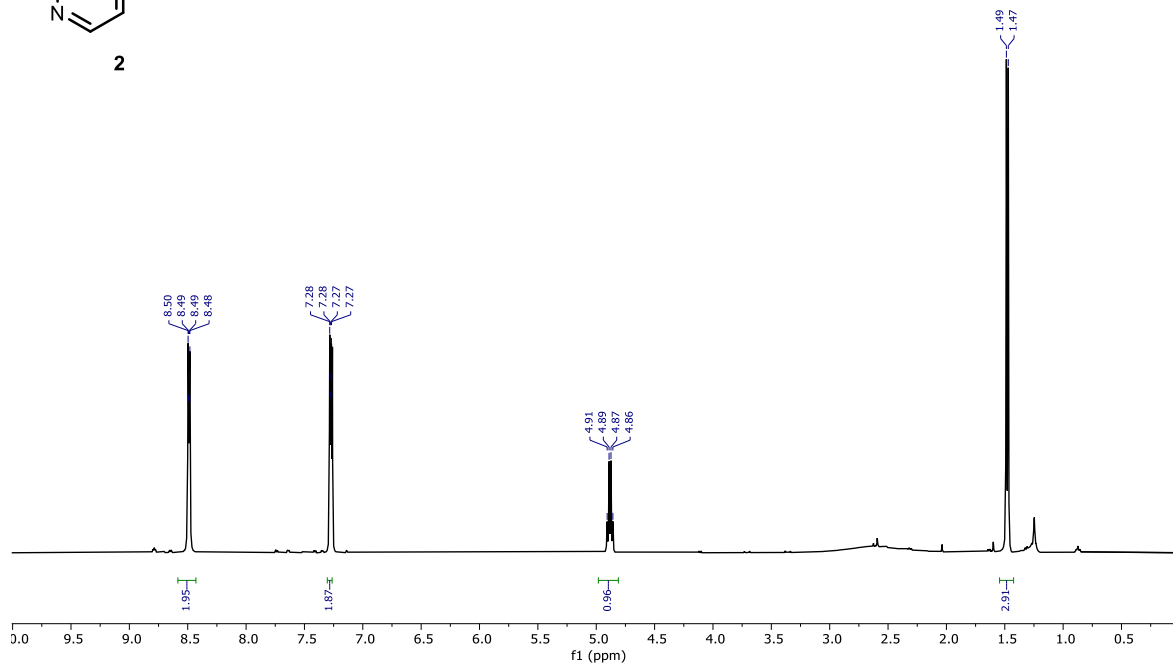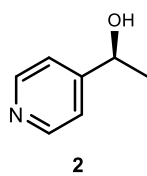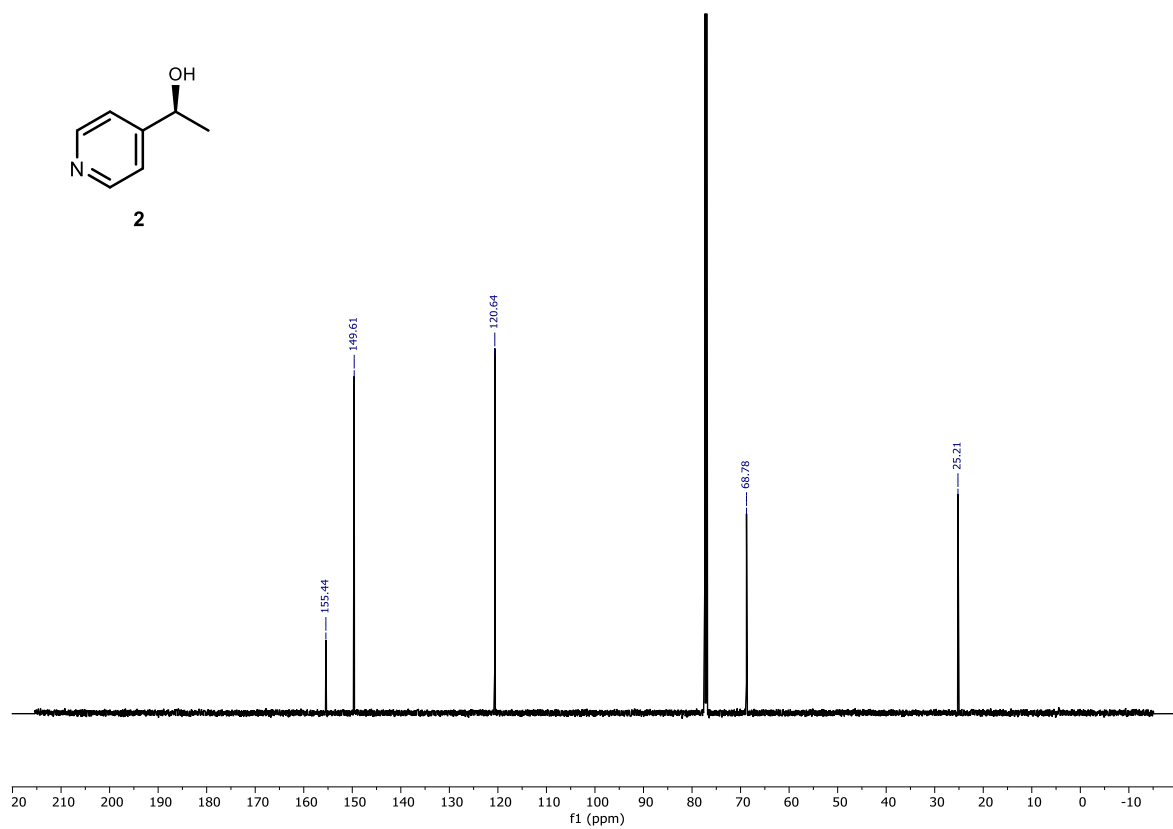

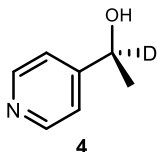

<sup>1</sup>H NMR

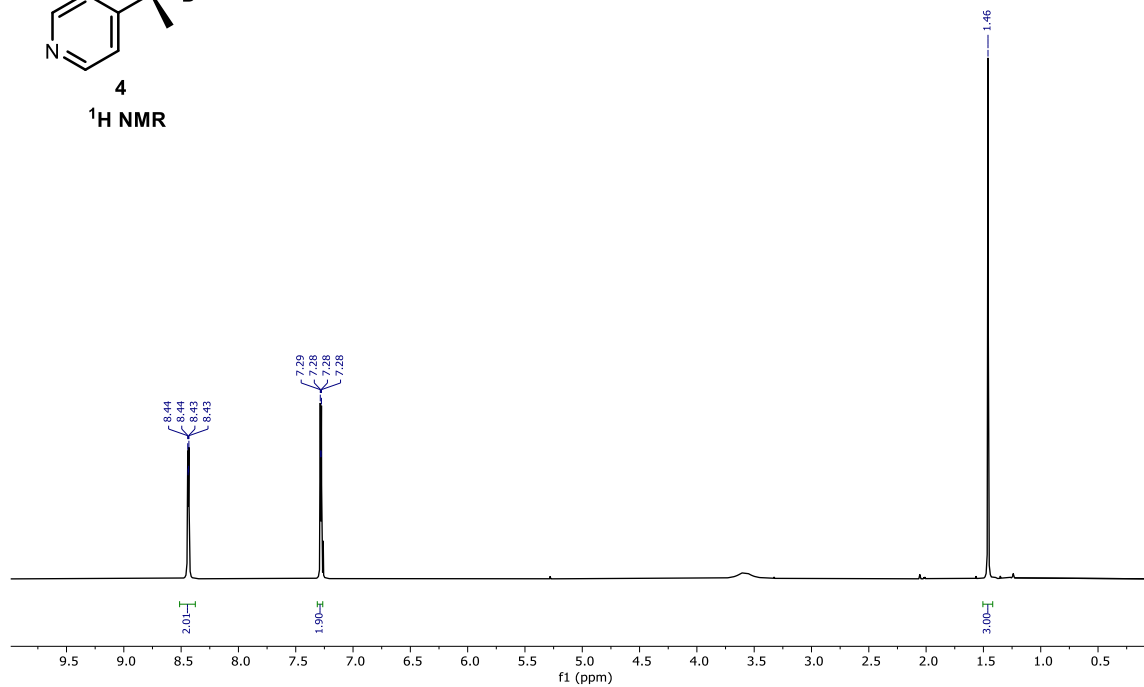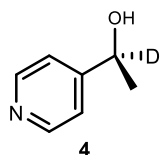

<sup>2</sup>H NMR

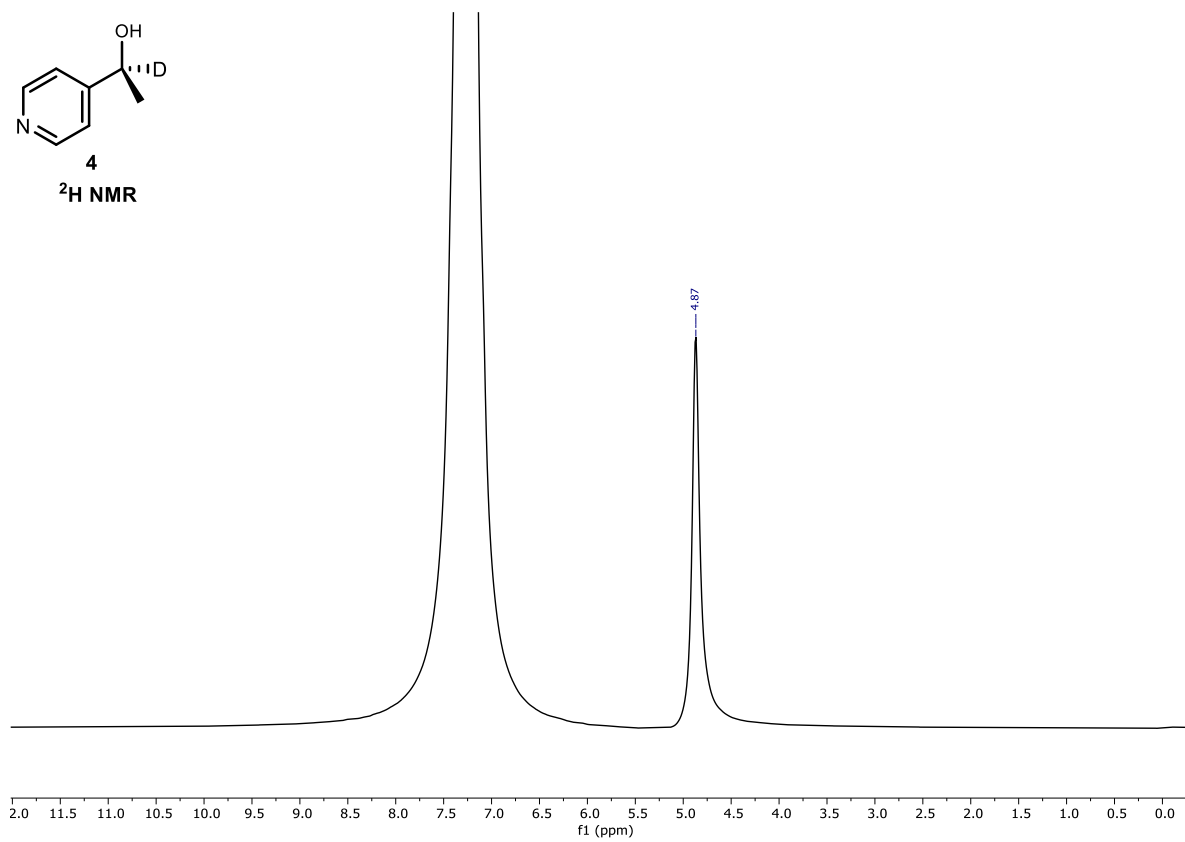

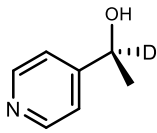

**4**  
<sup>13</sup>C NMR

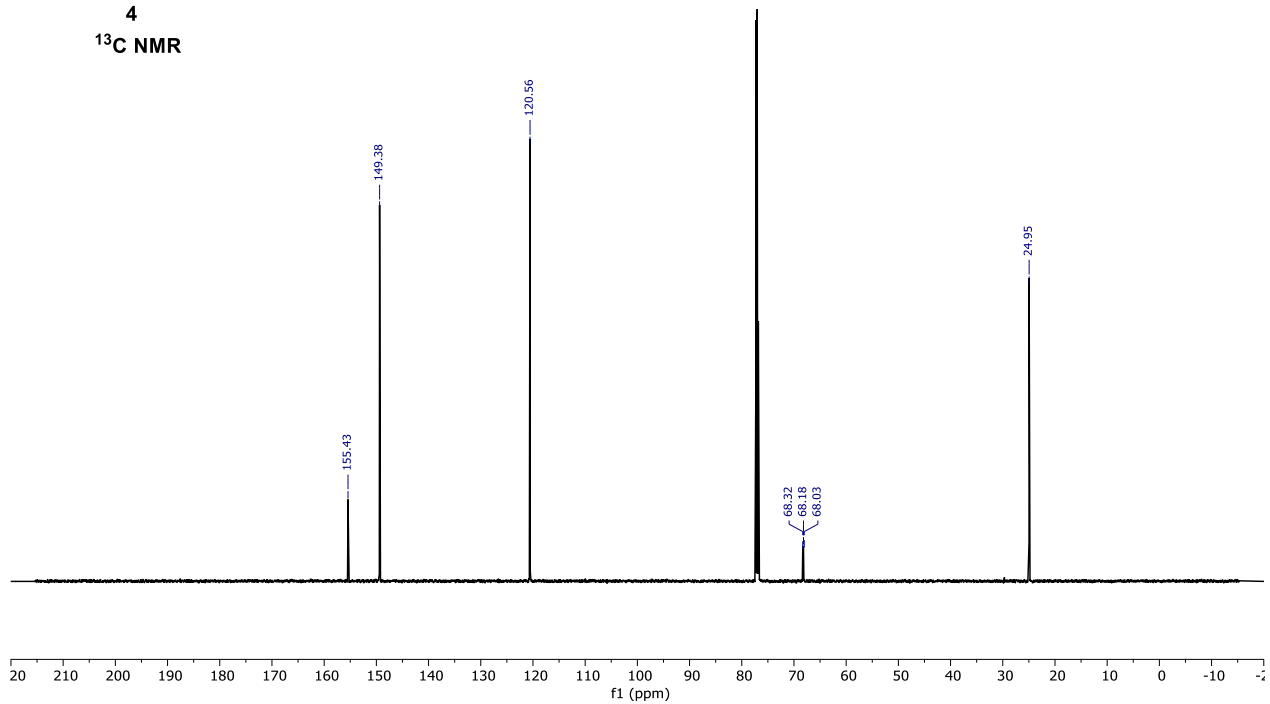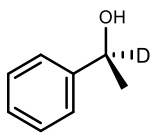

**6**  
<sup>1</sup>H NMR

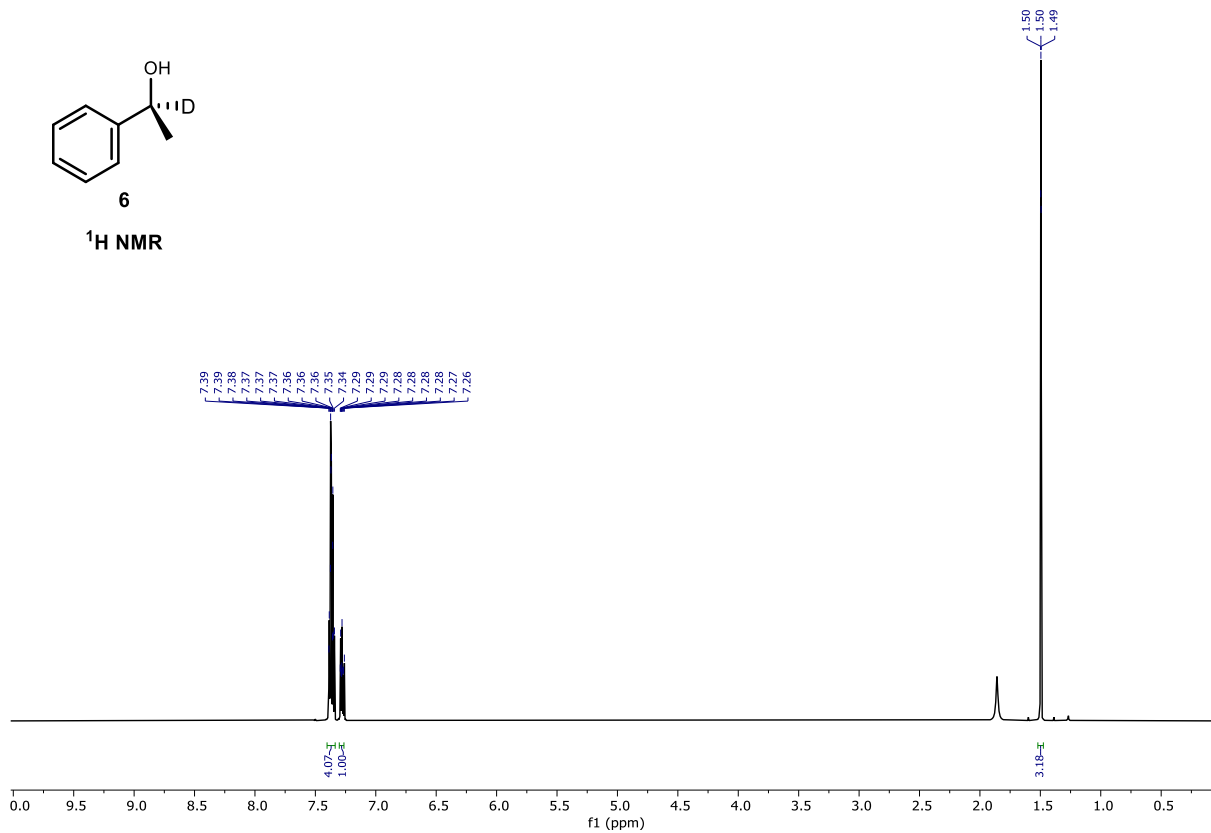

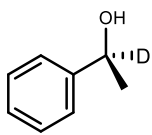

6  
<sup>2</sup>H NMR

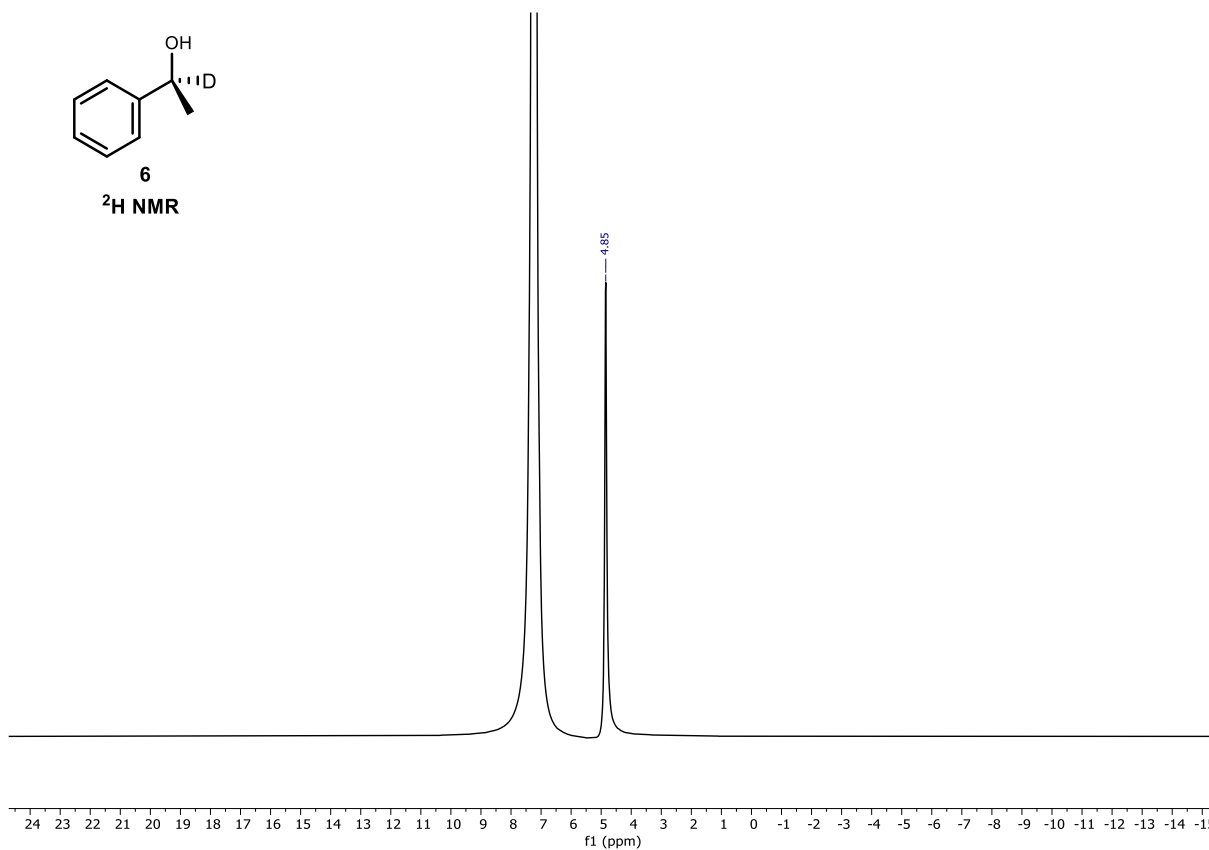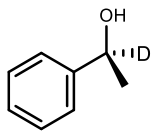

6  
<sup>13</sup>C NMR

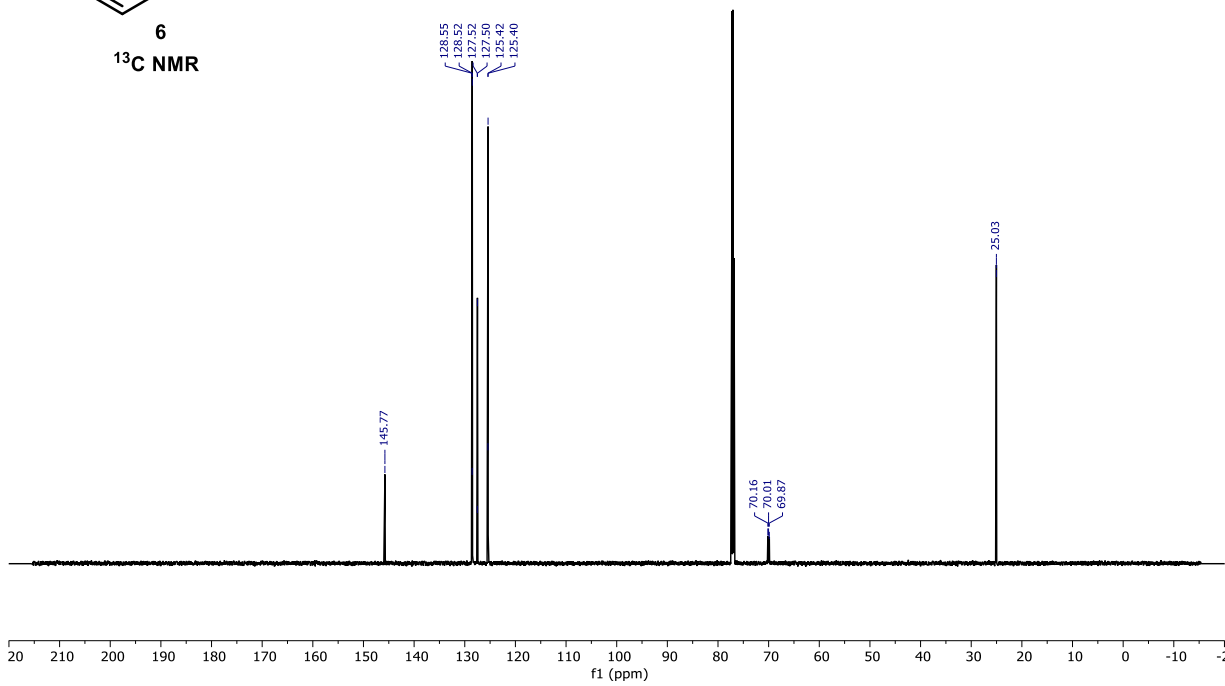

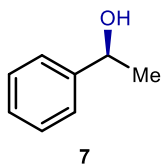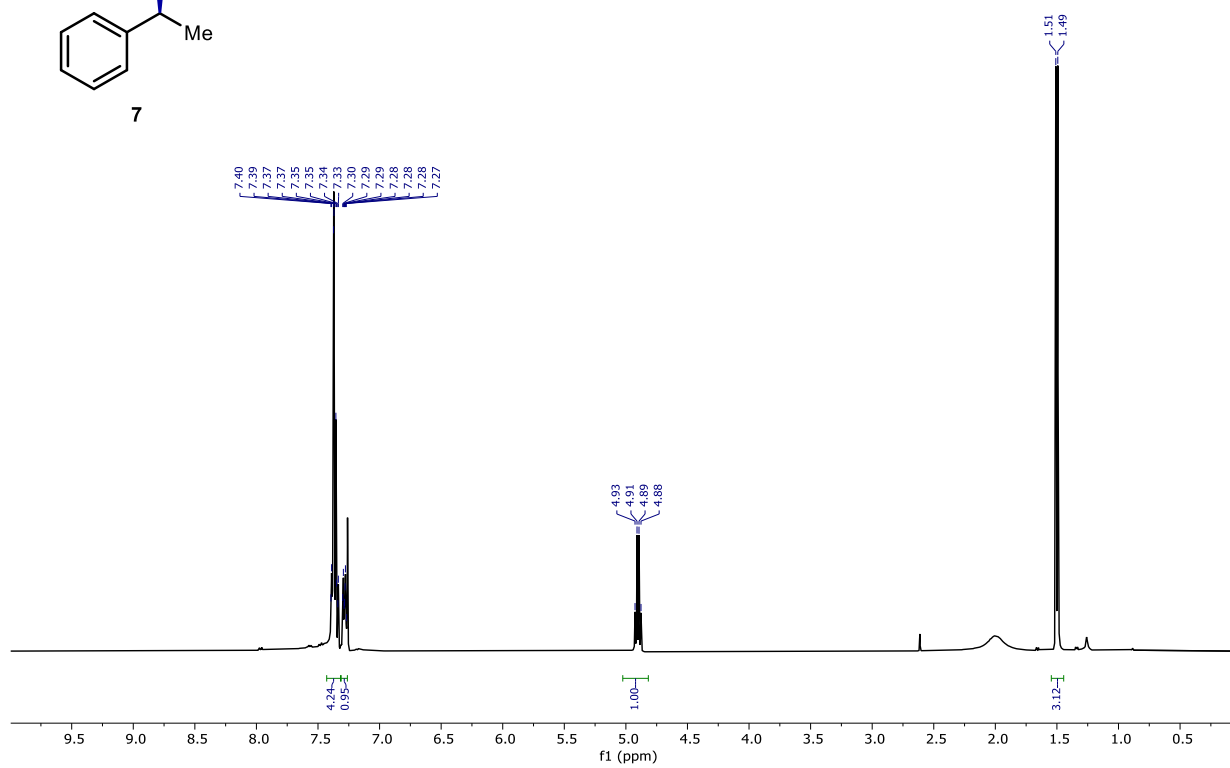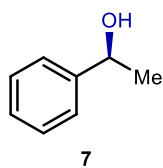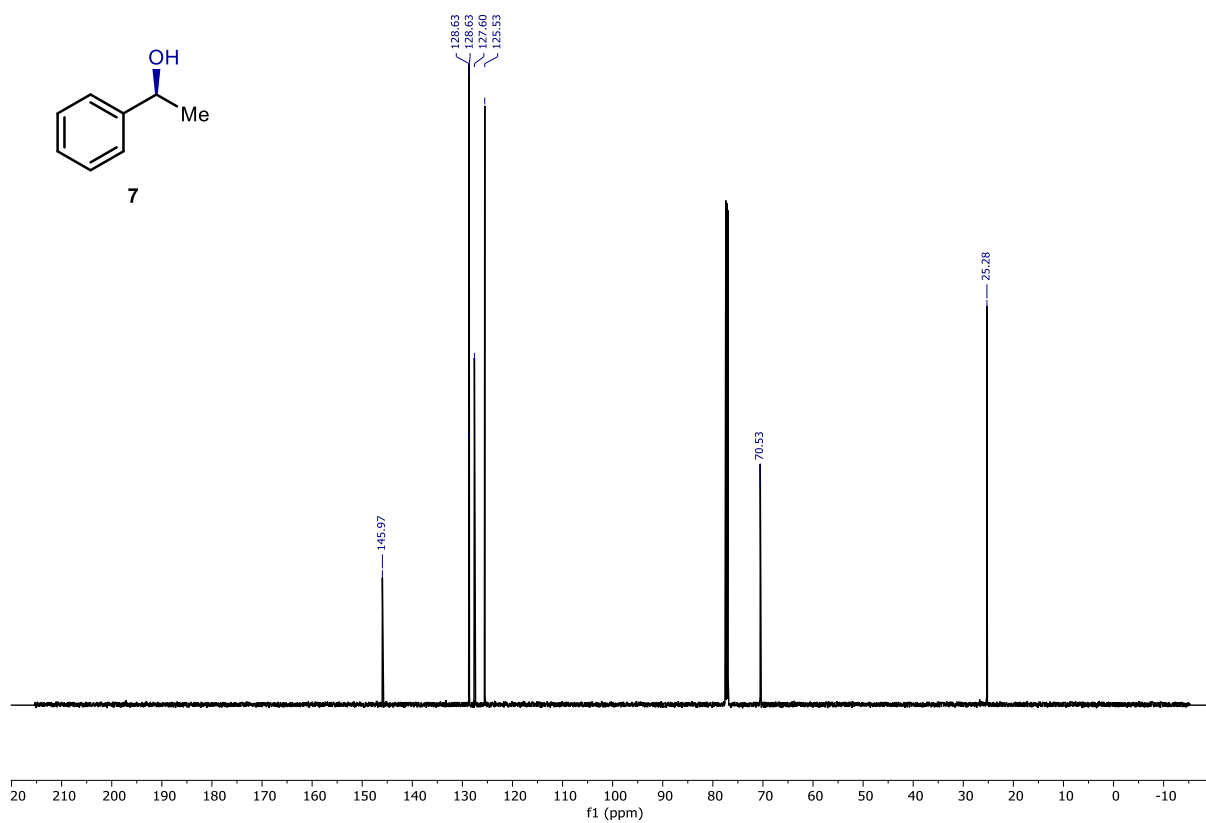

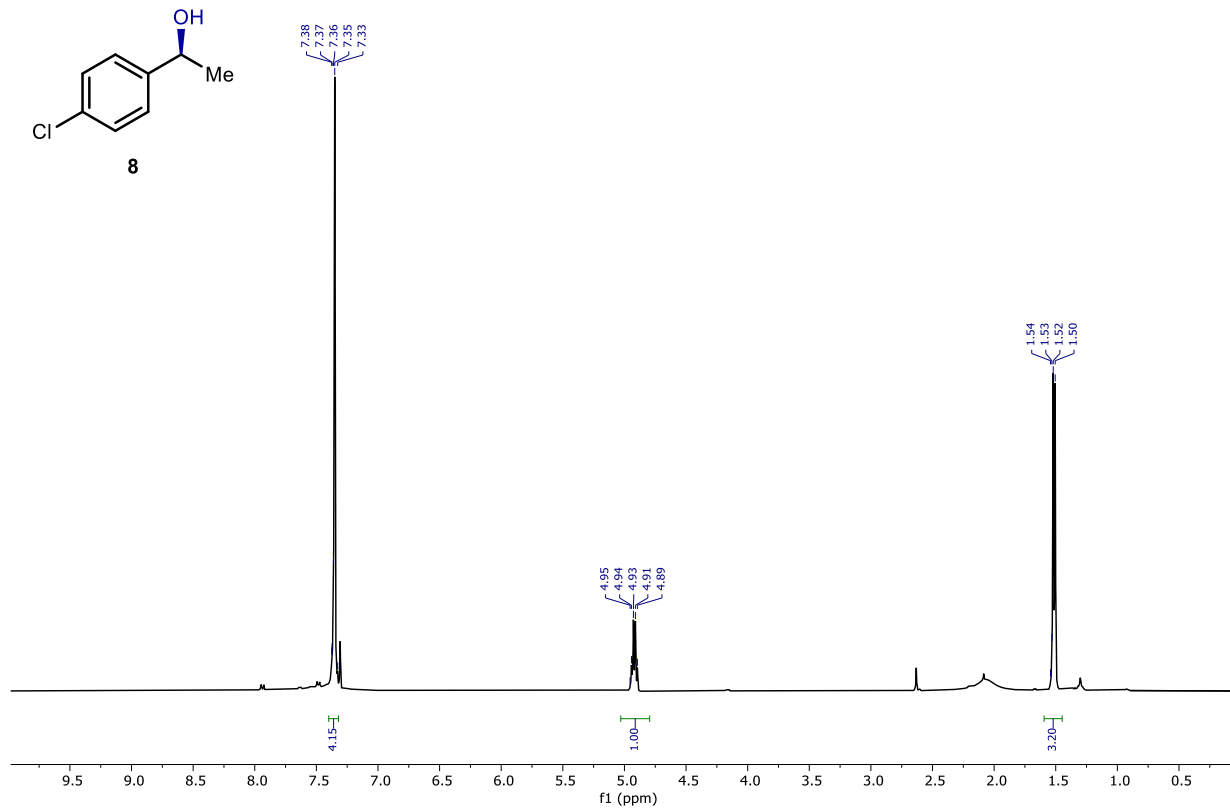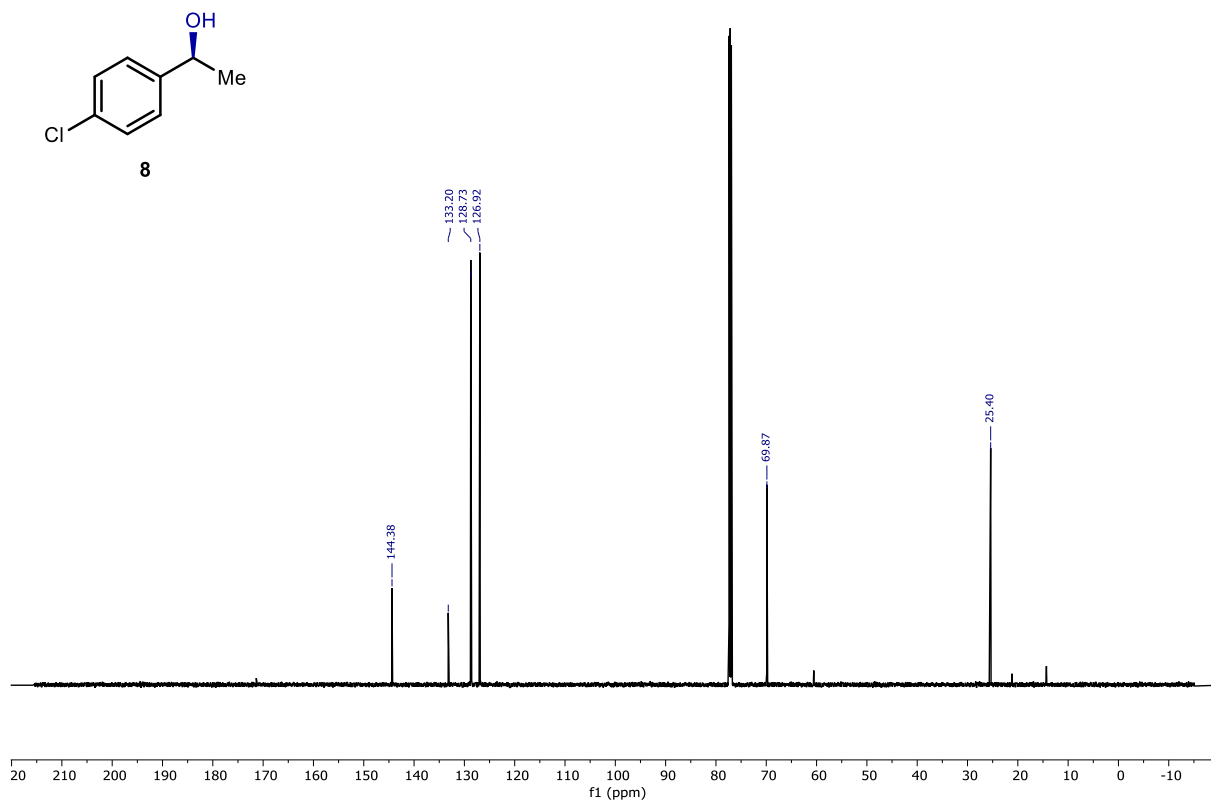

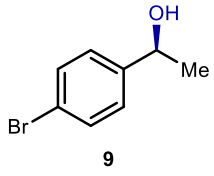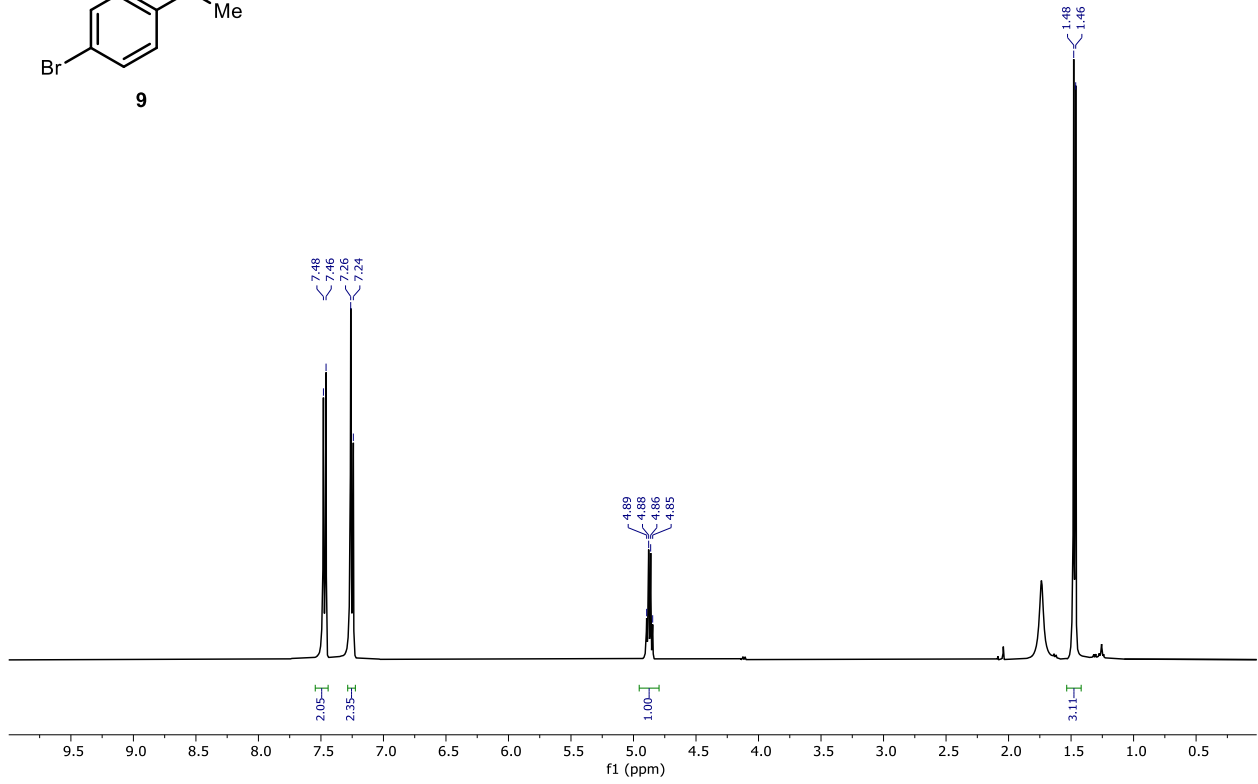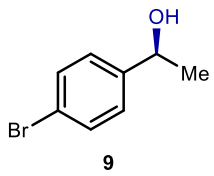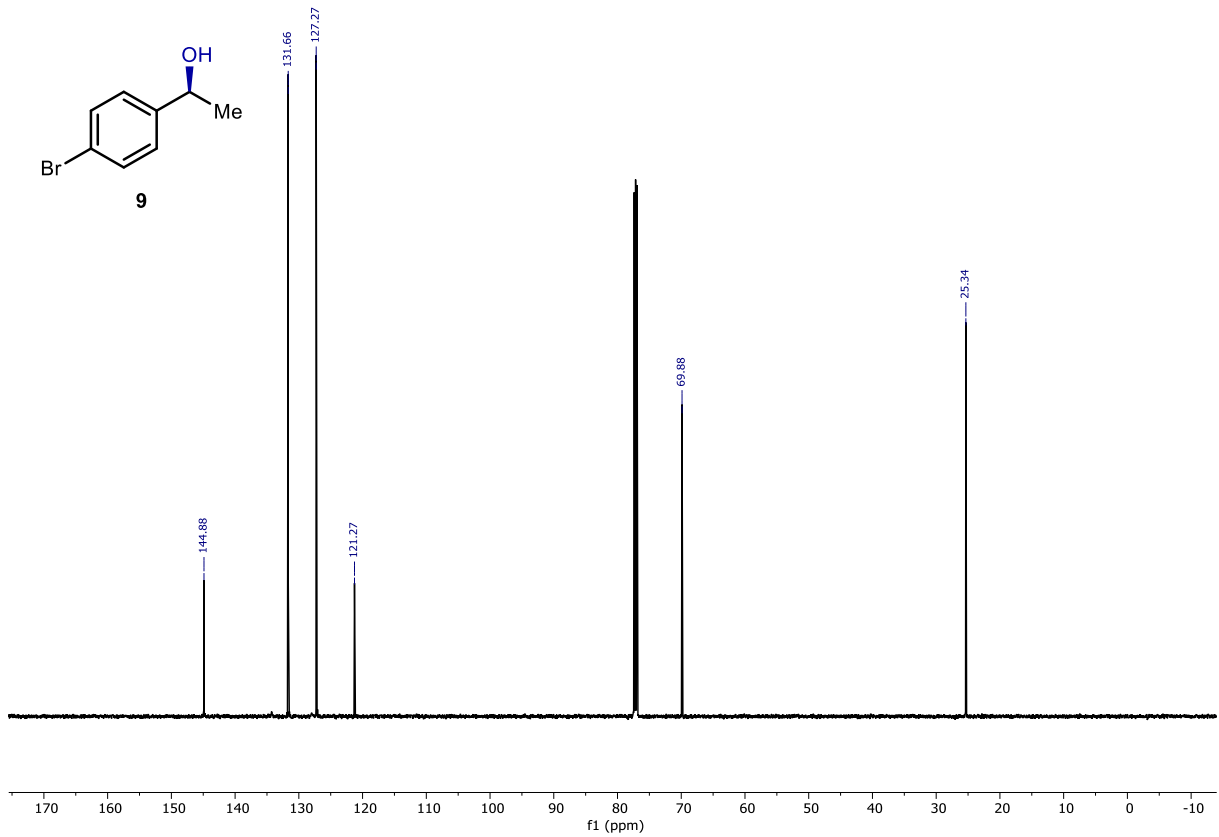



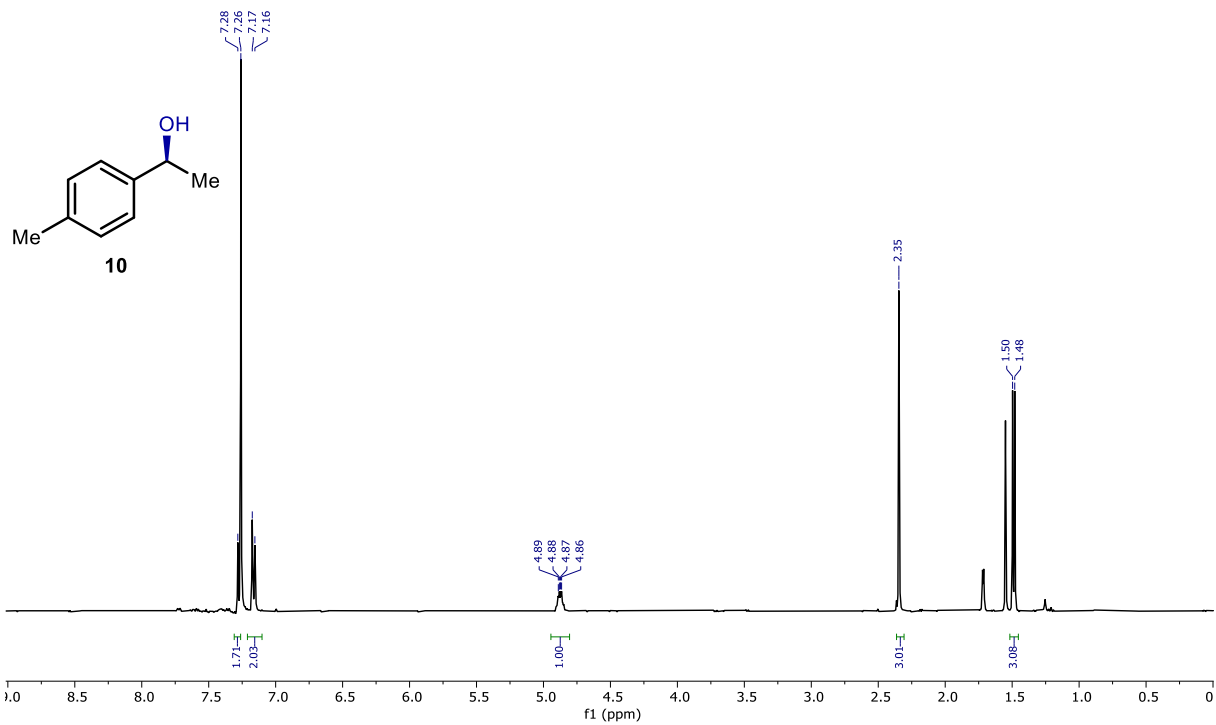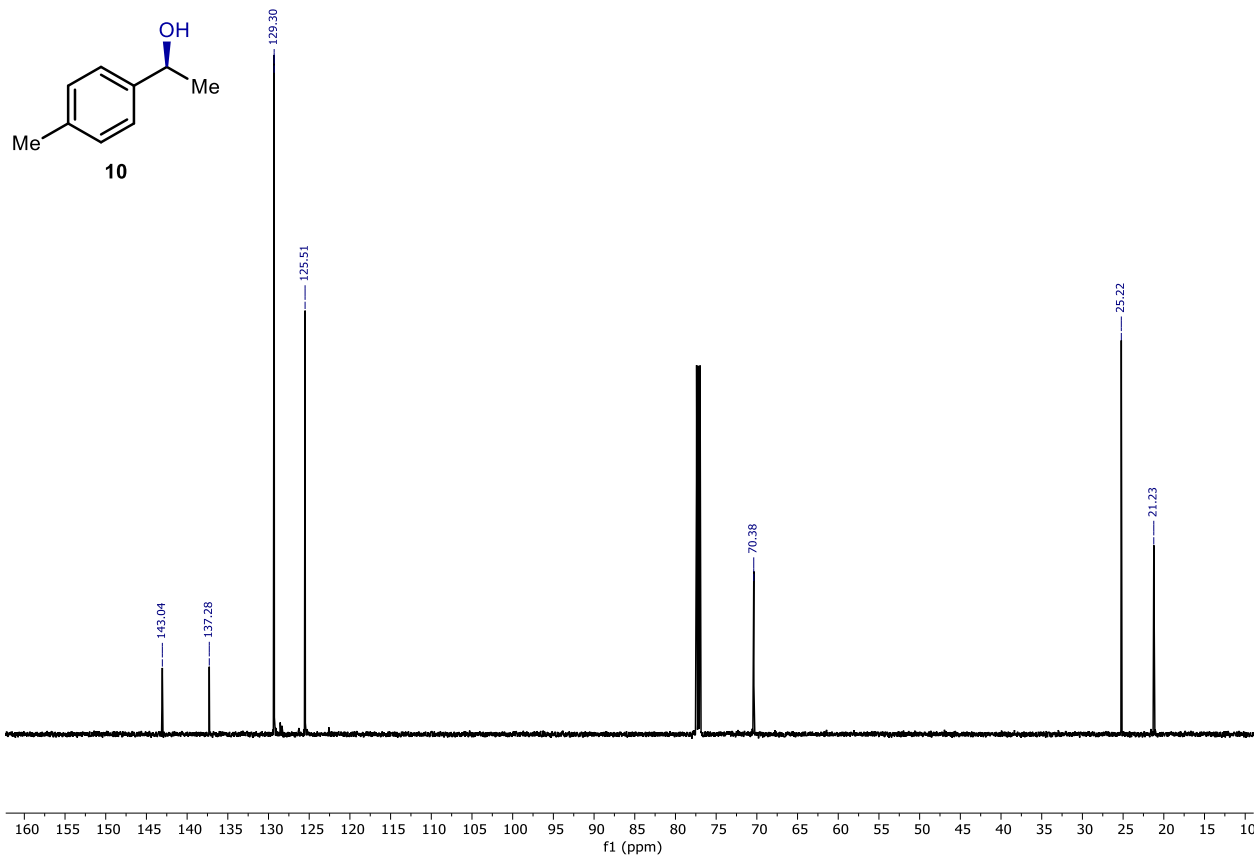

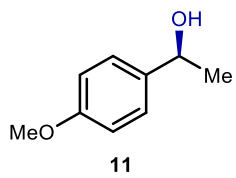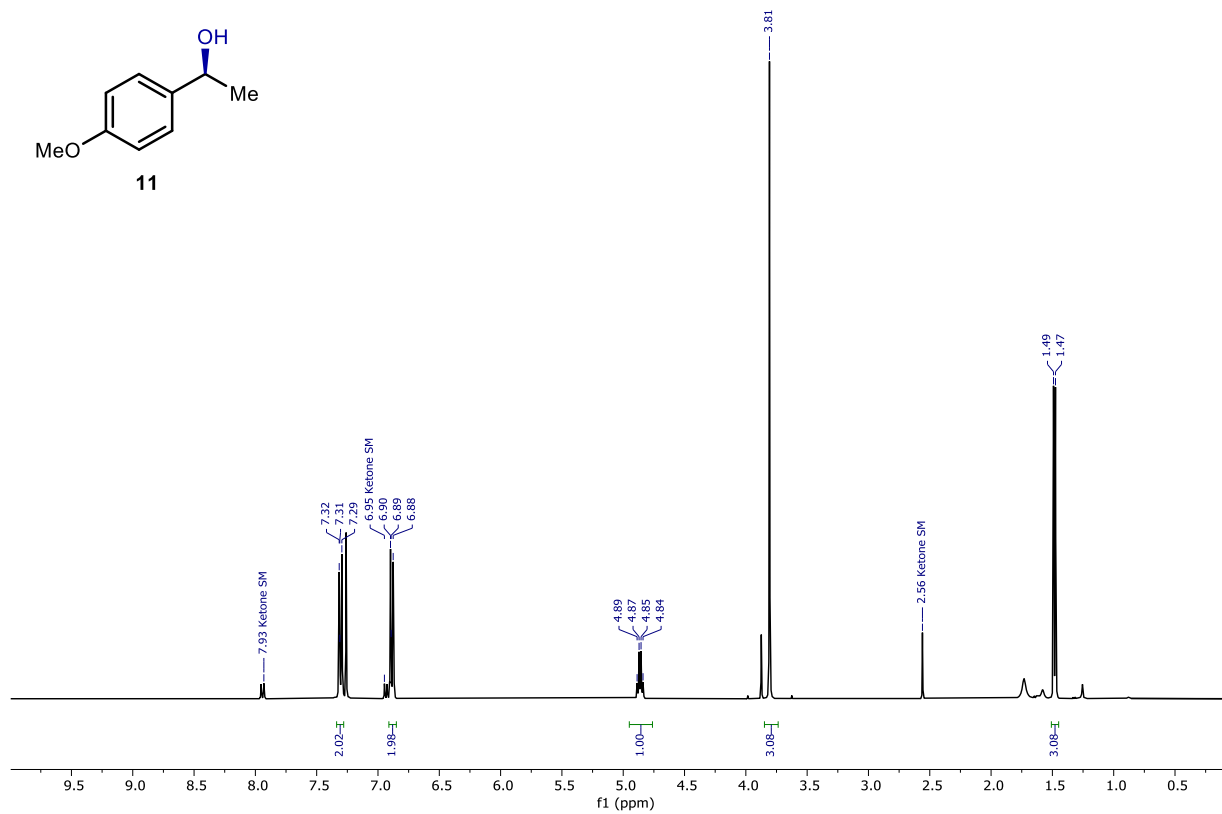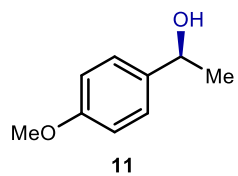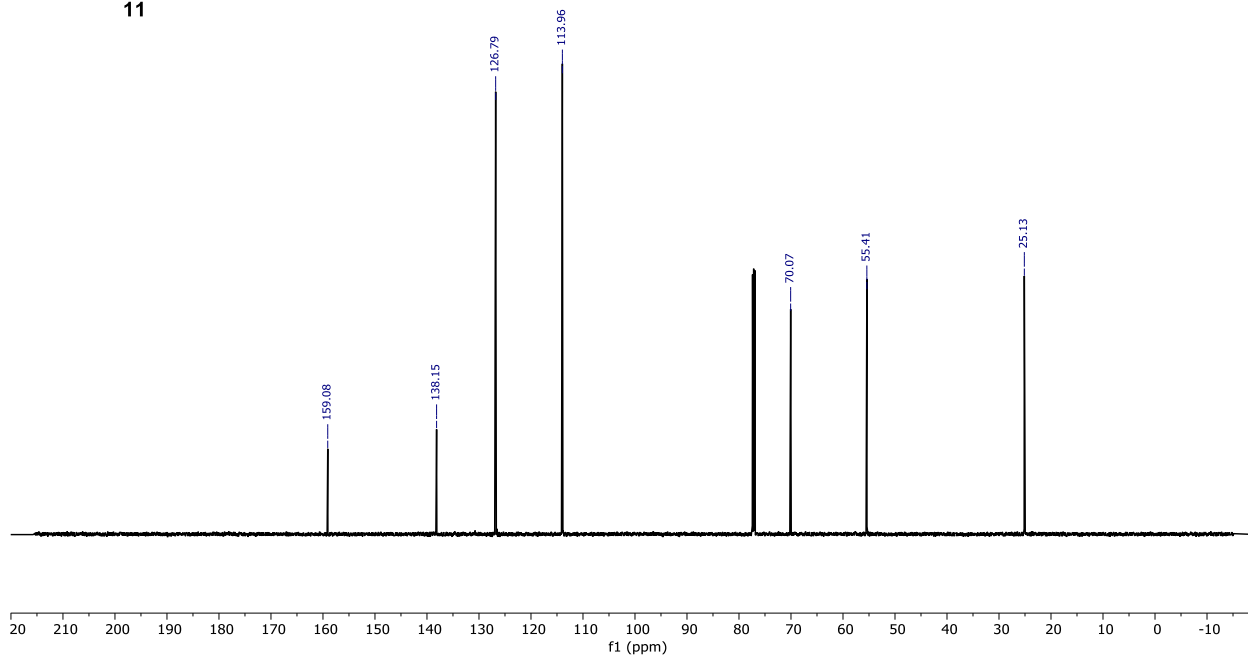

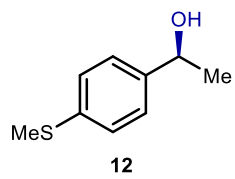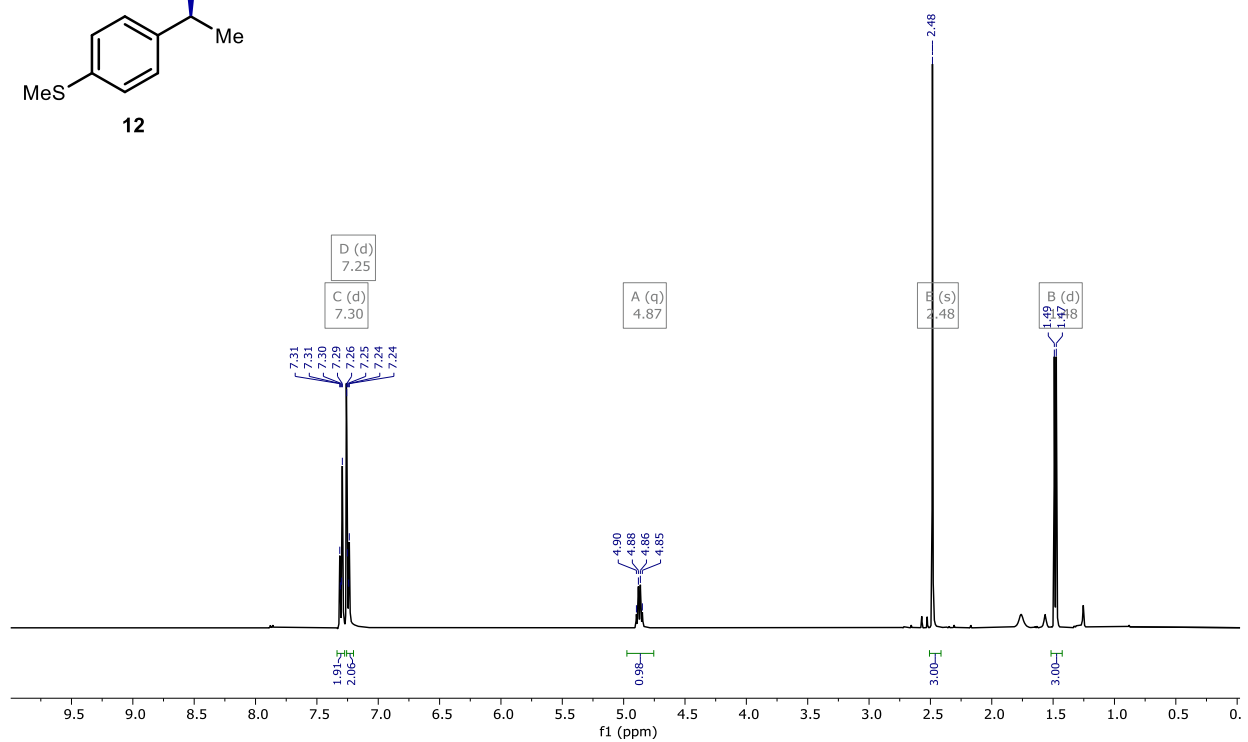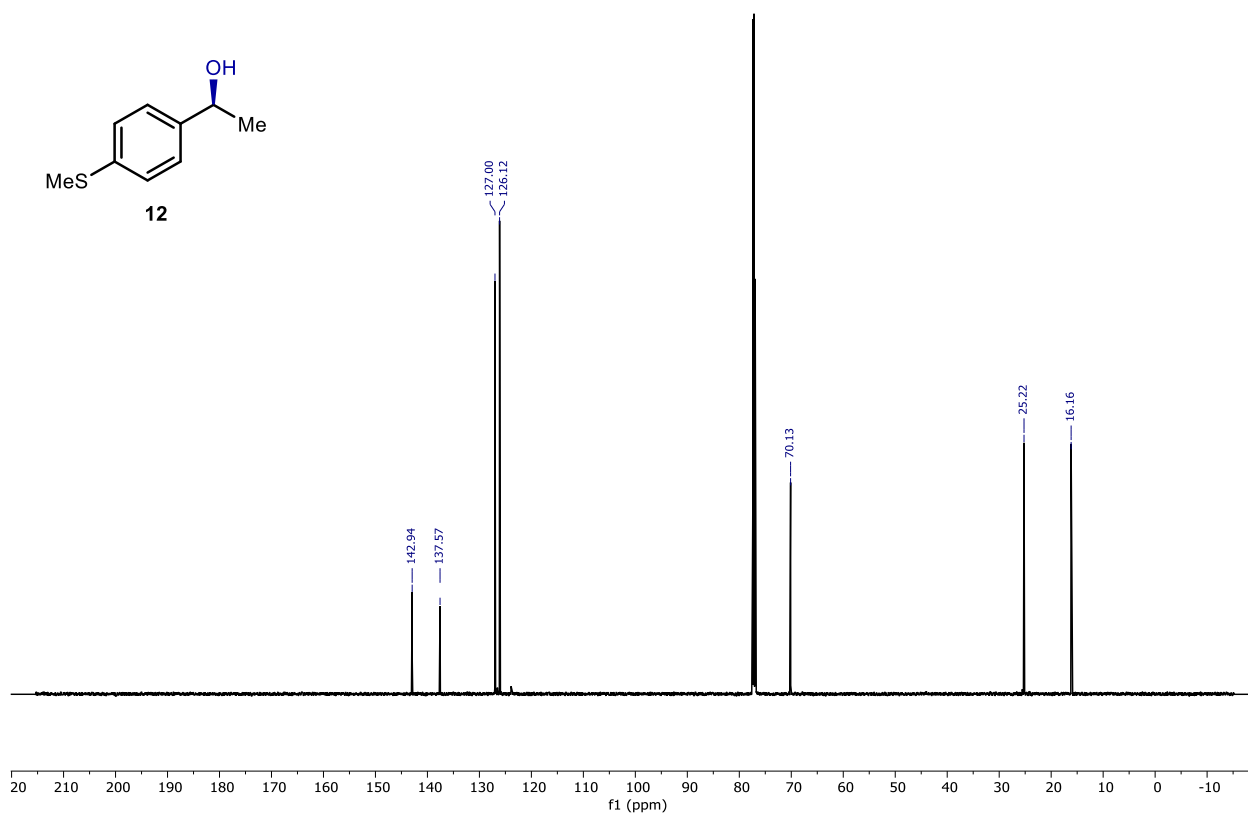

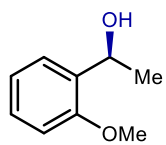

13

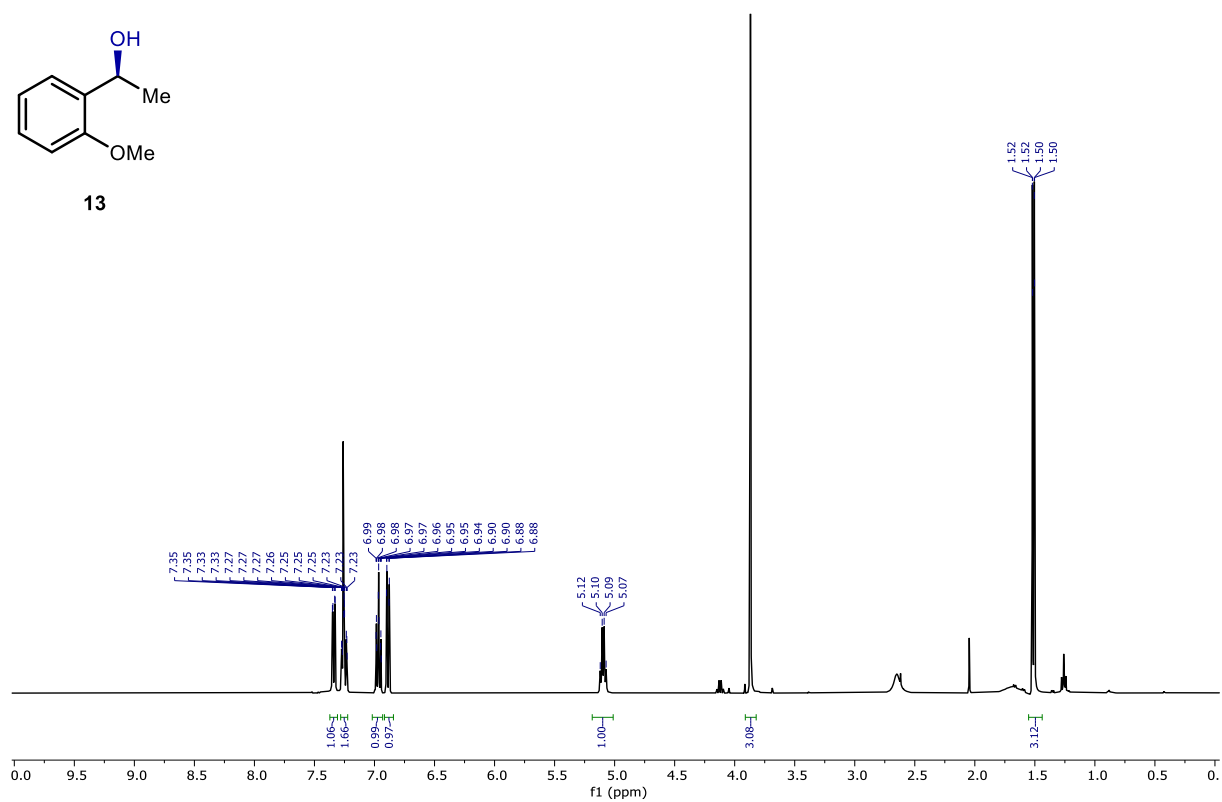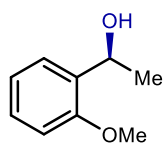

13

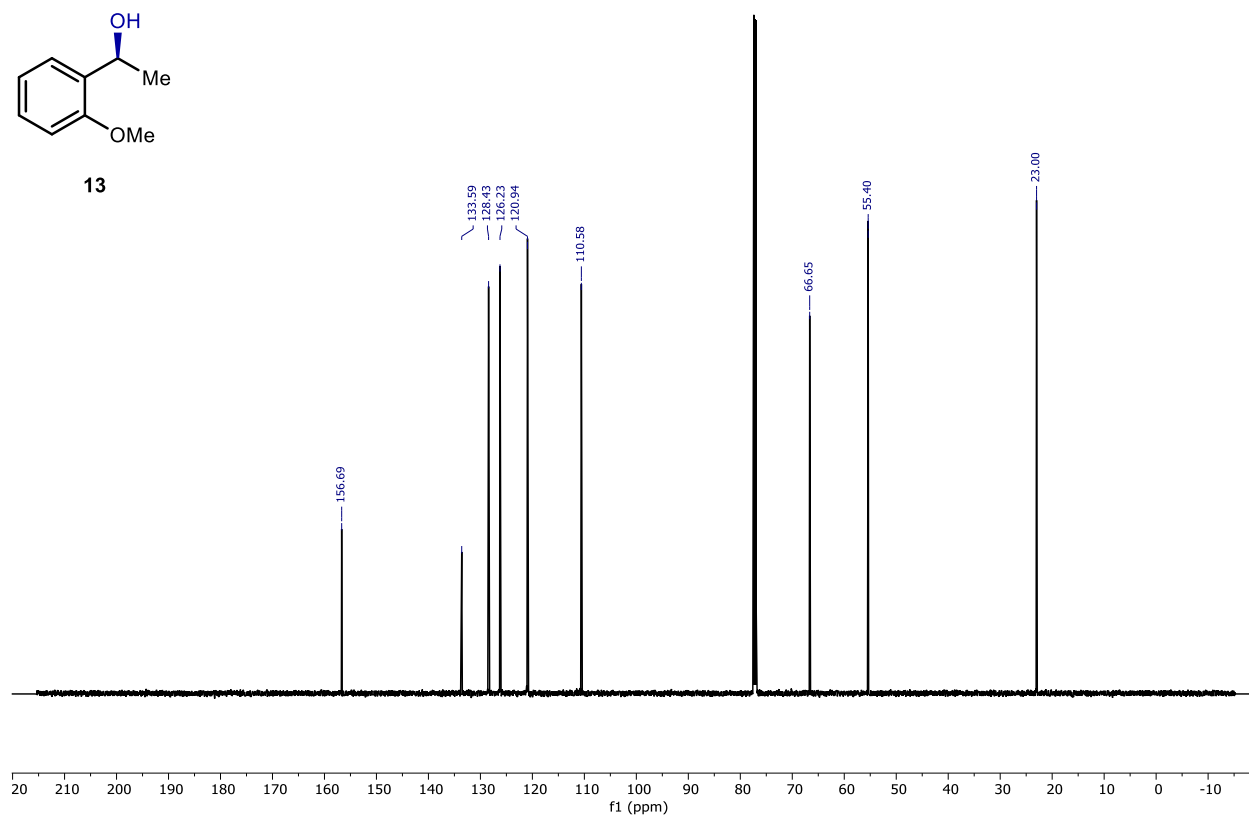

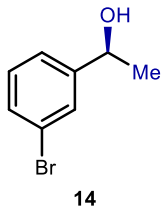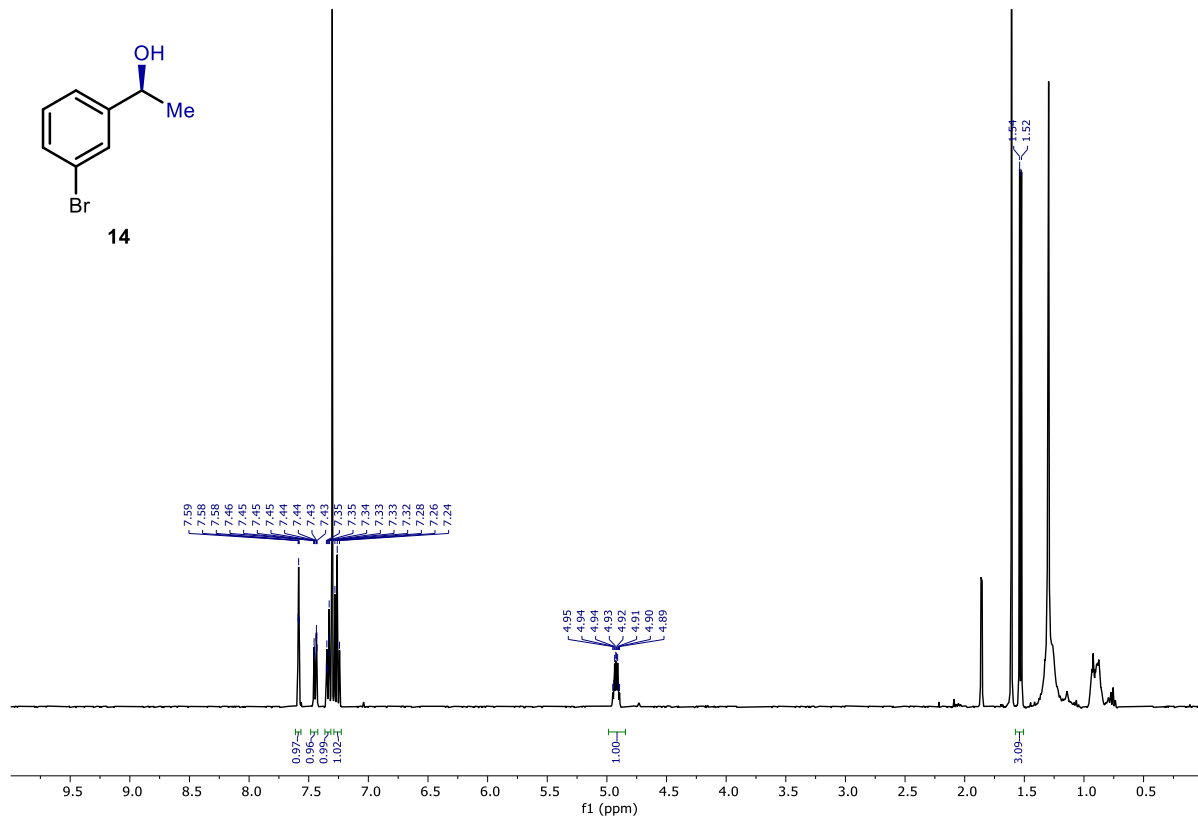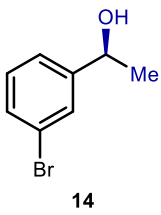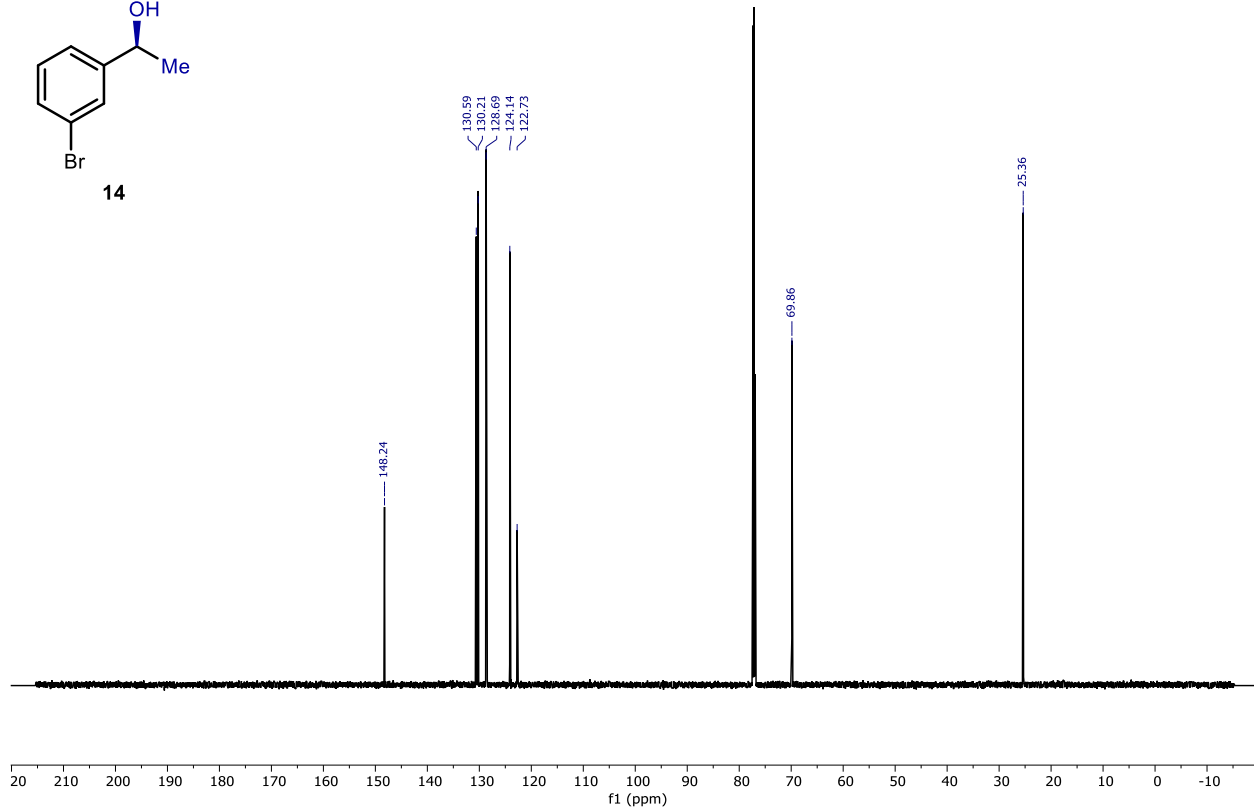

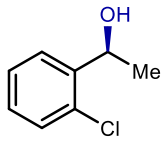

15

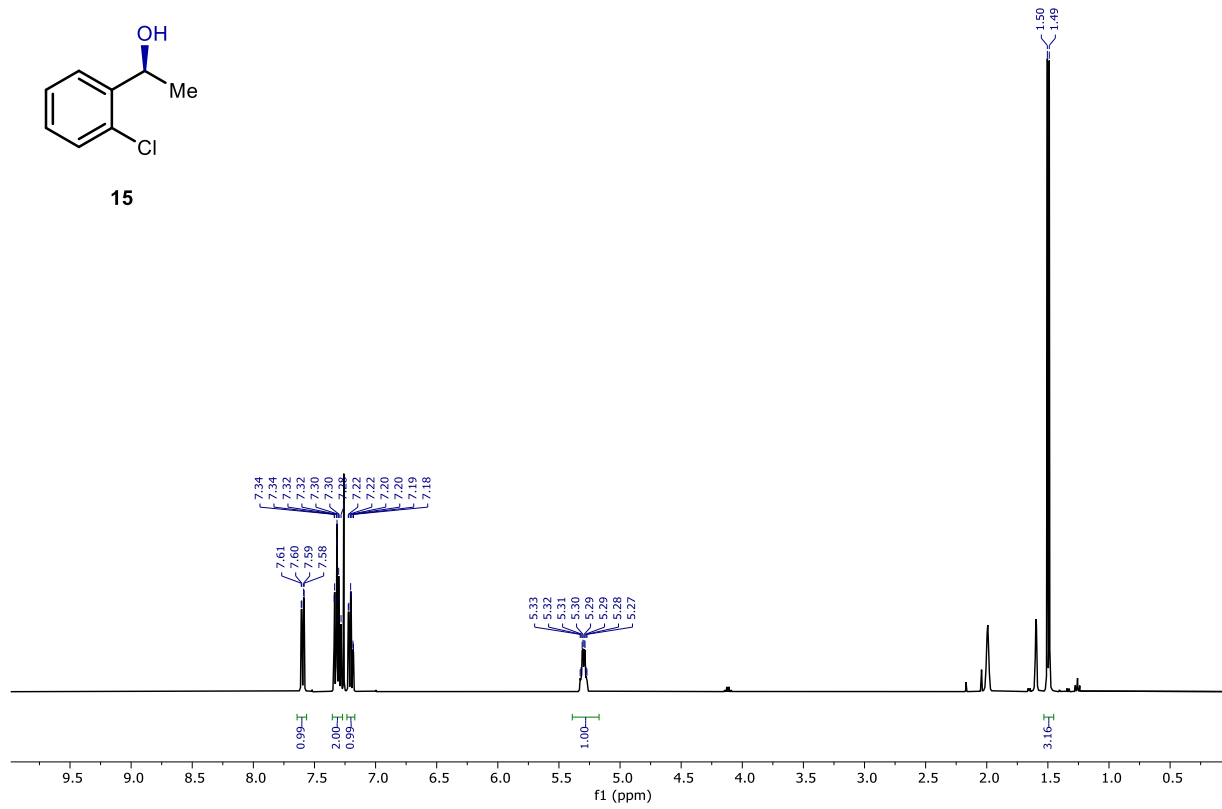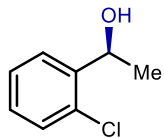

15

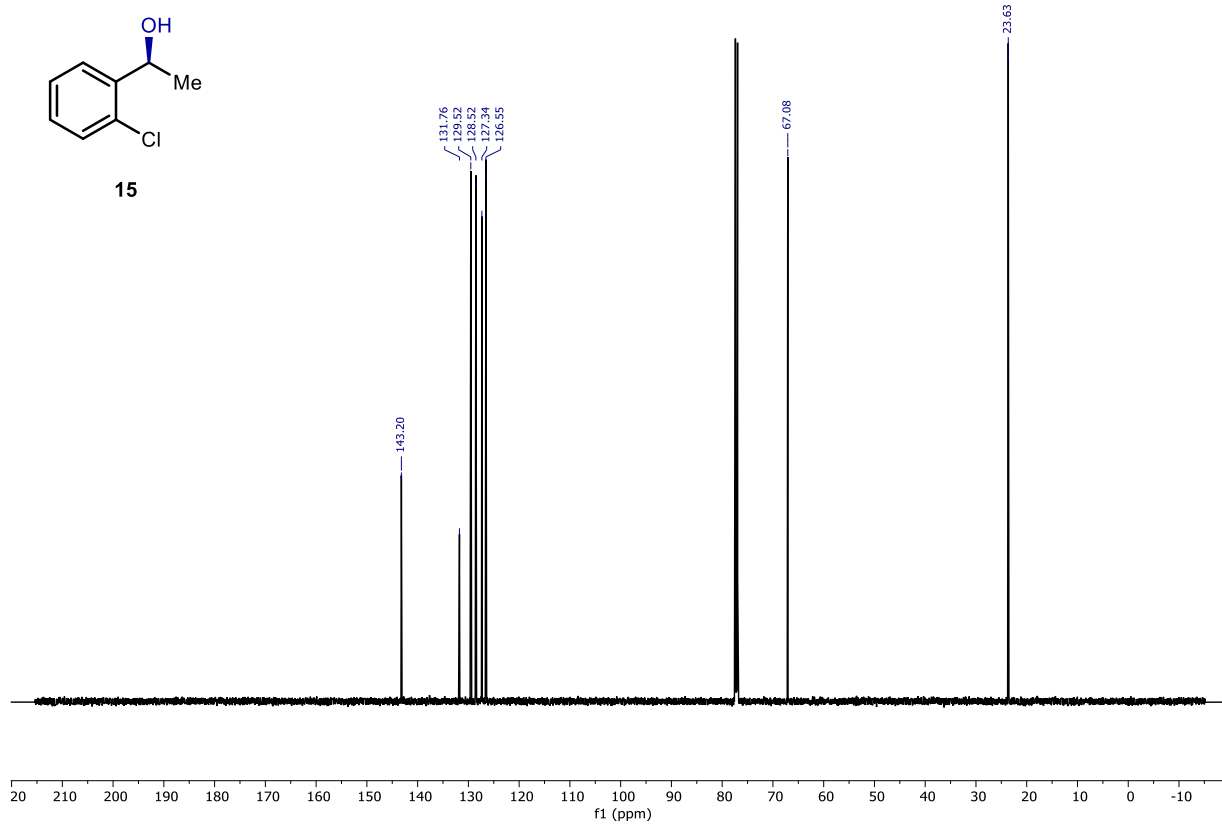

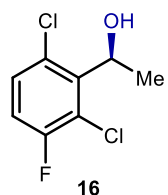

**<sup>1</sup>H NMR**

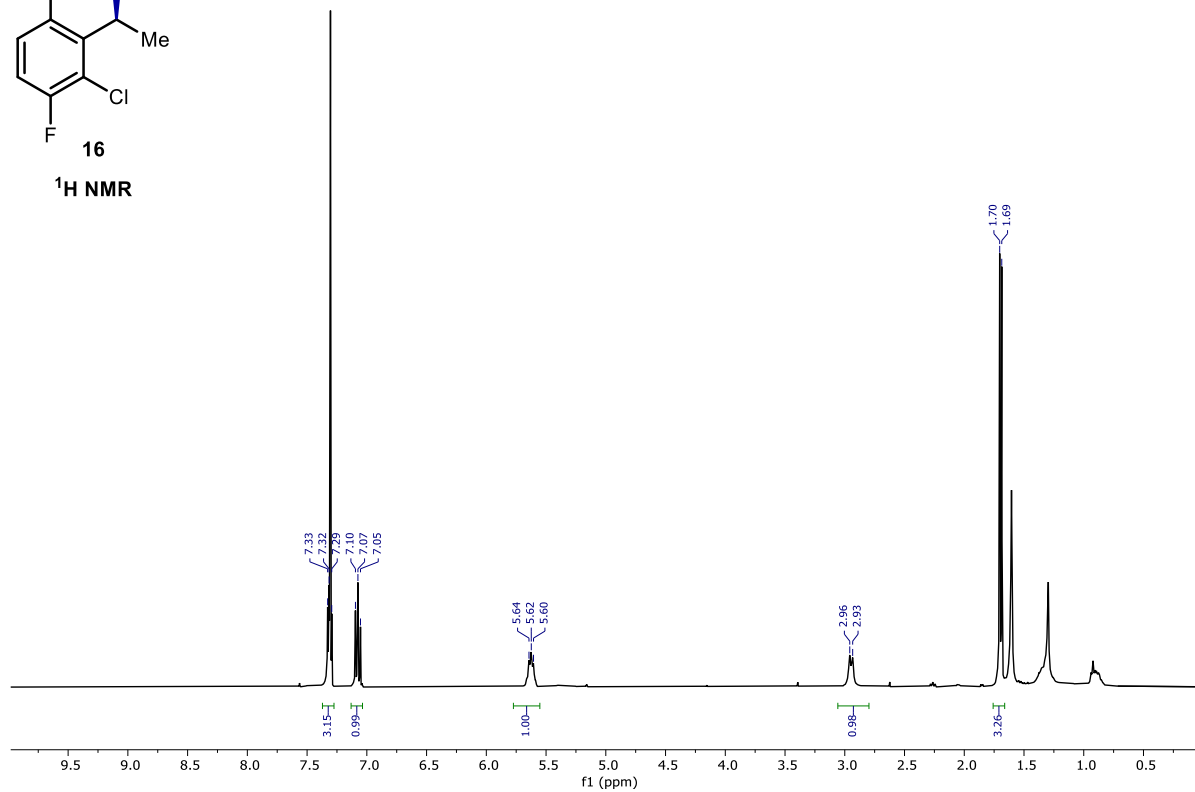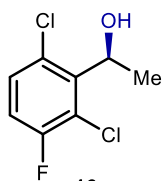

**<sup>13</sup>C NMR**

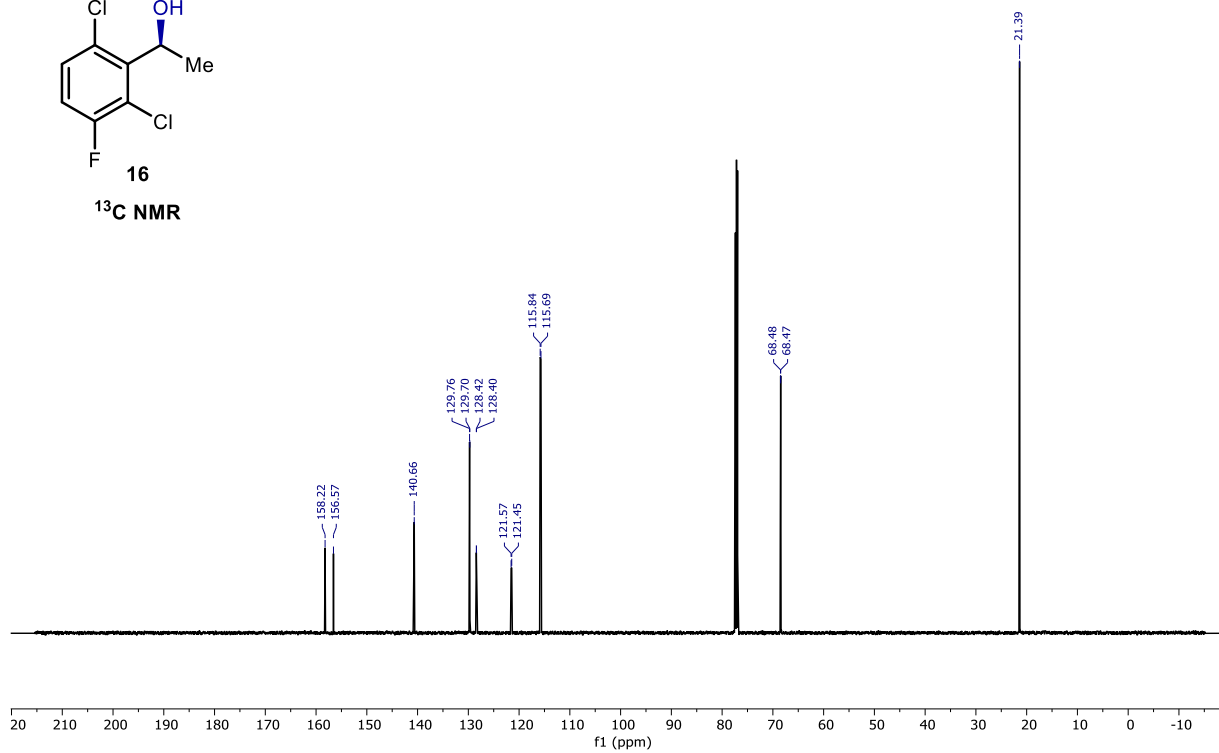

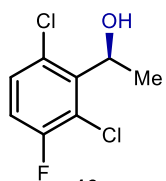

<sup>19</sup>F NMR

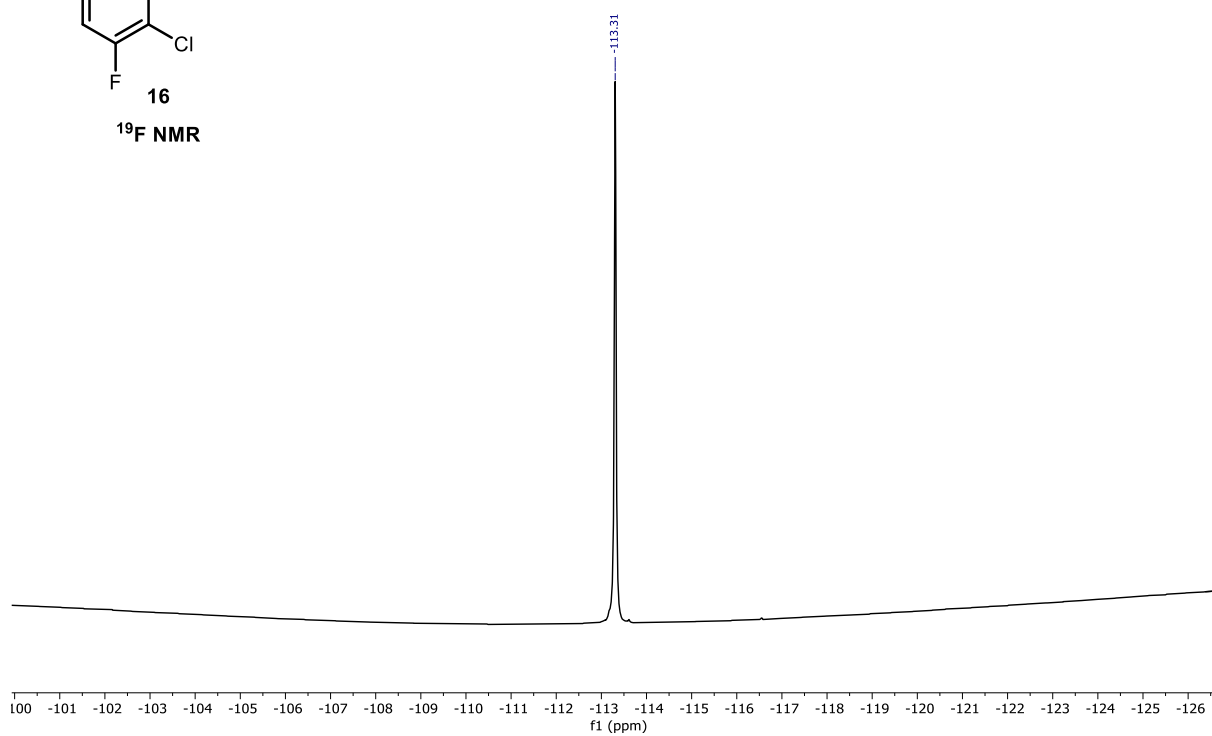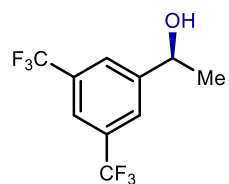

<sup>1</sup>H NMR

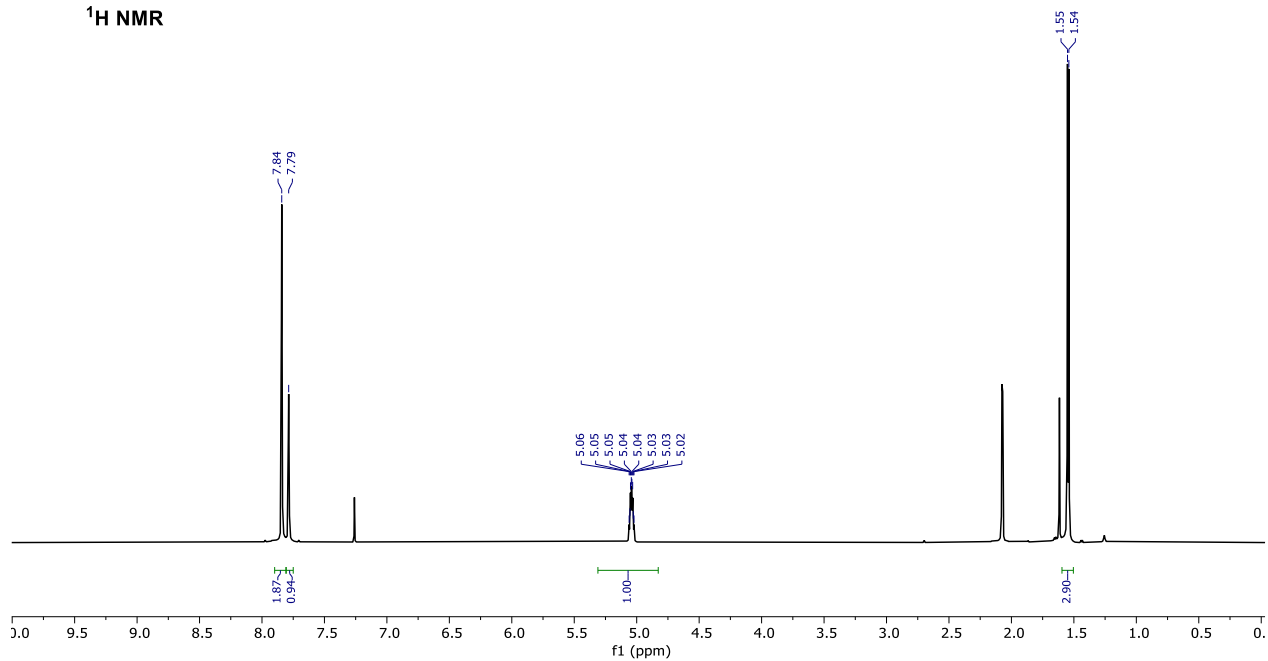



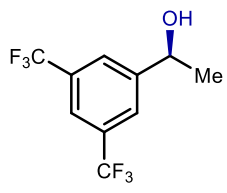

<sup>2</sup>H NMR

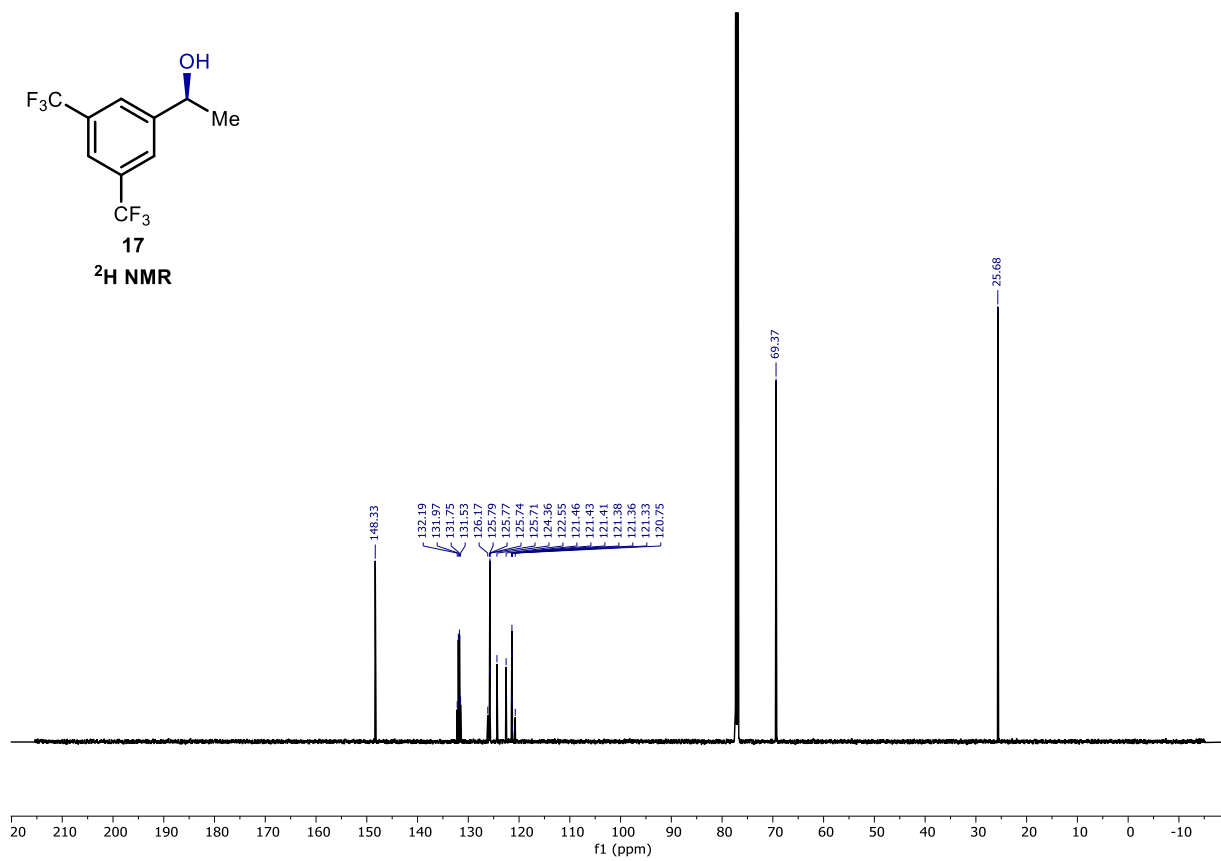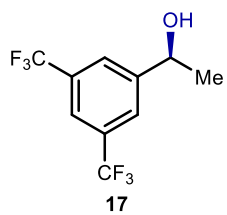

<sup>19</sup>F NMR

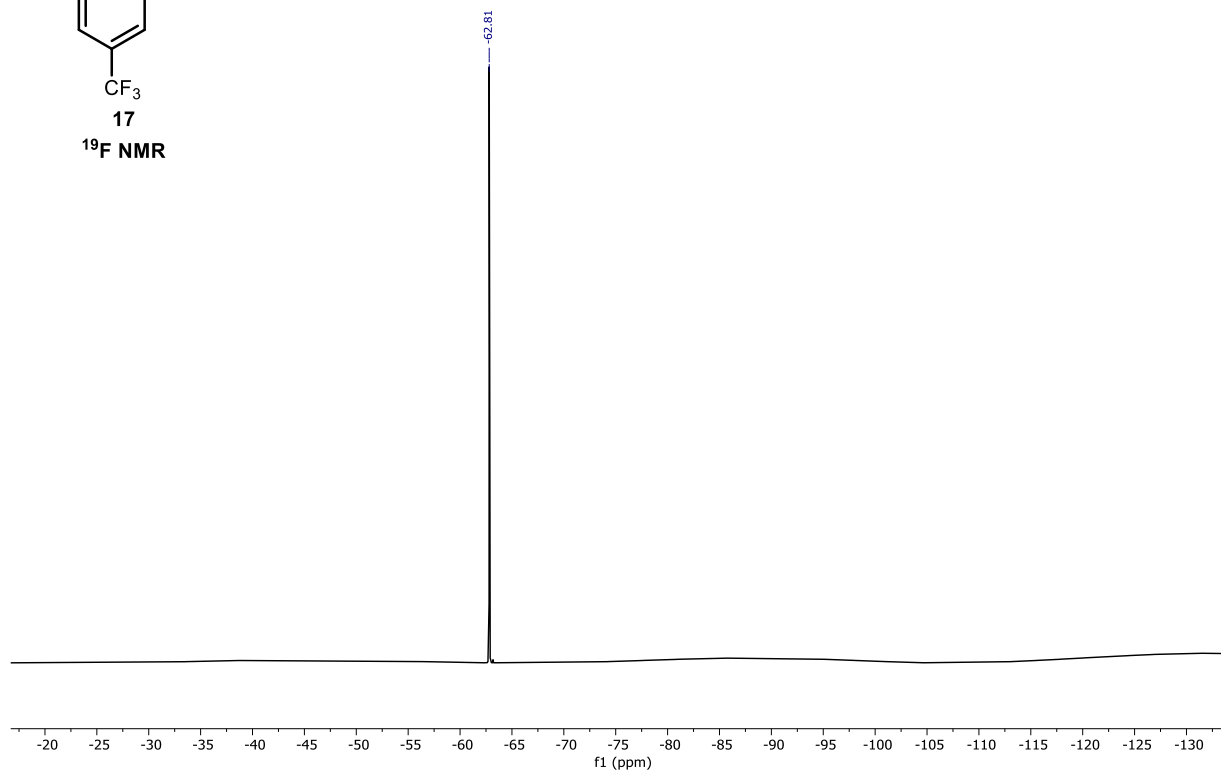

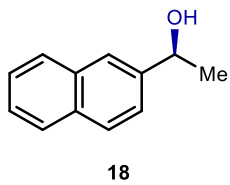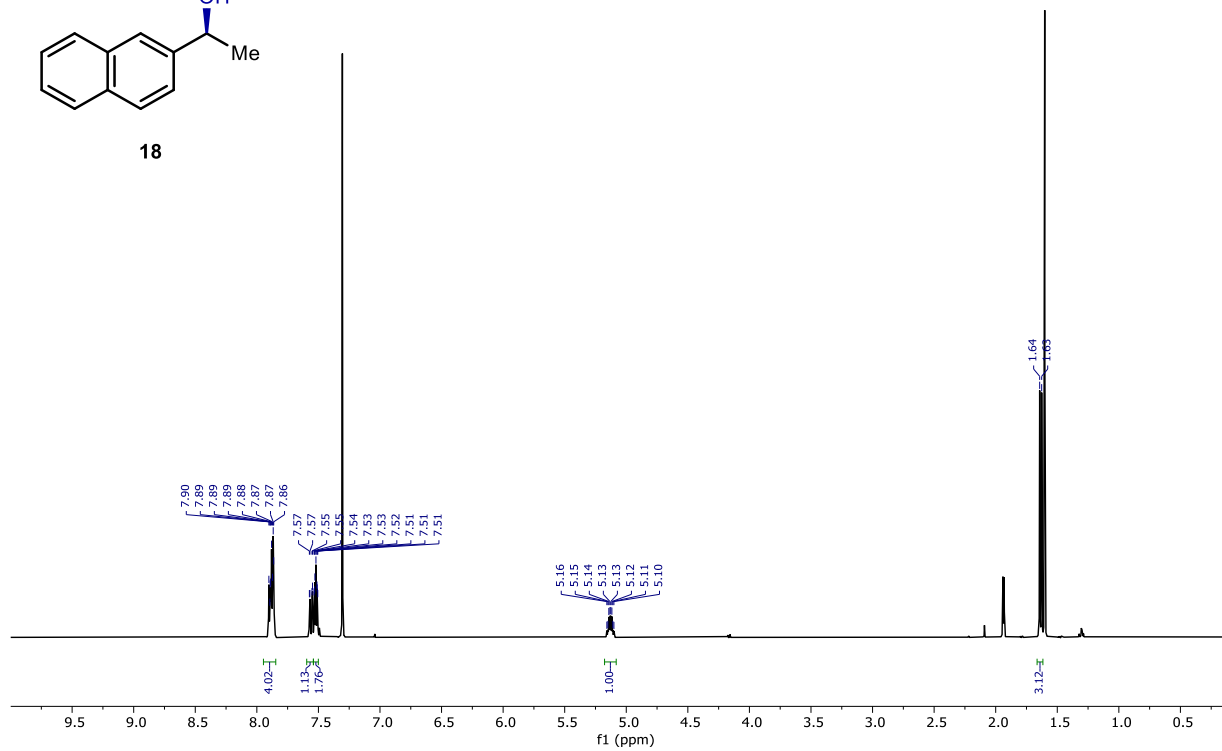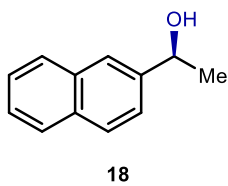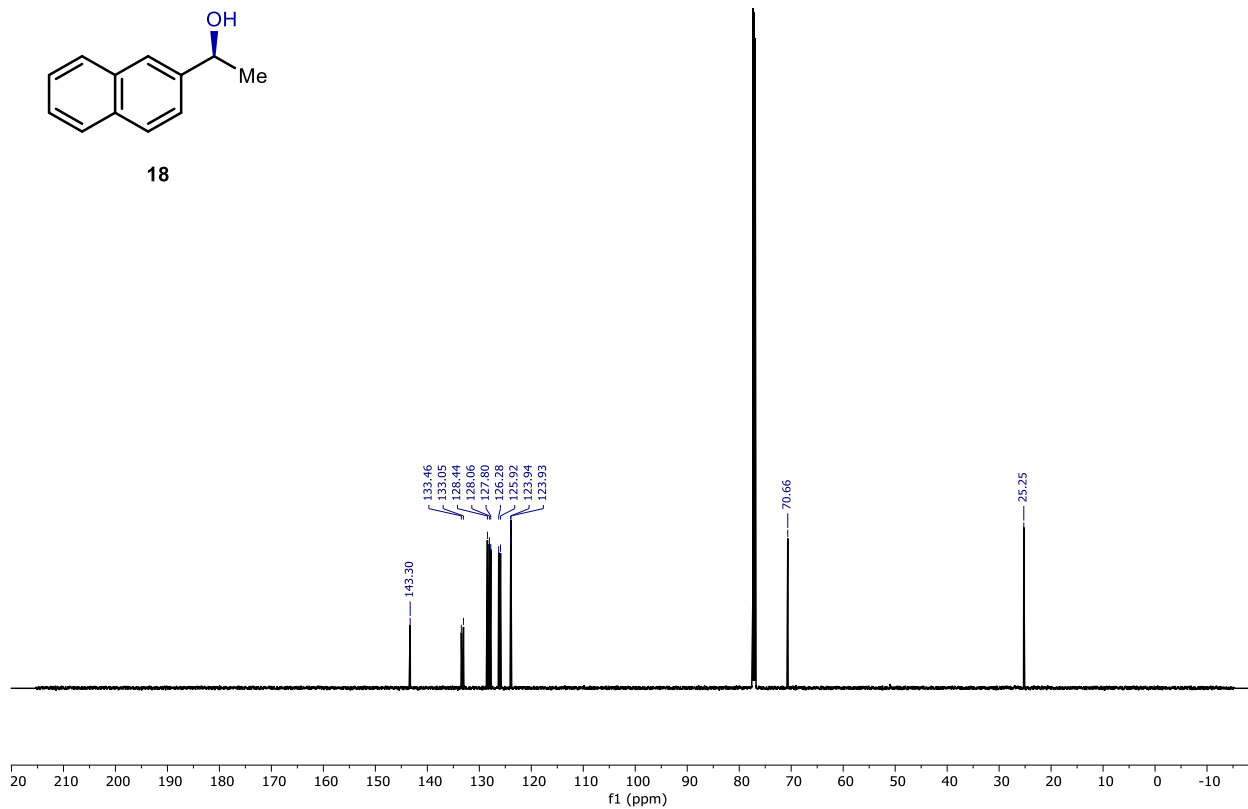

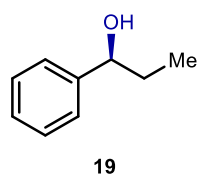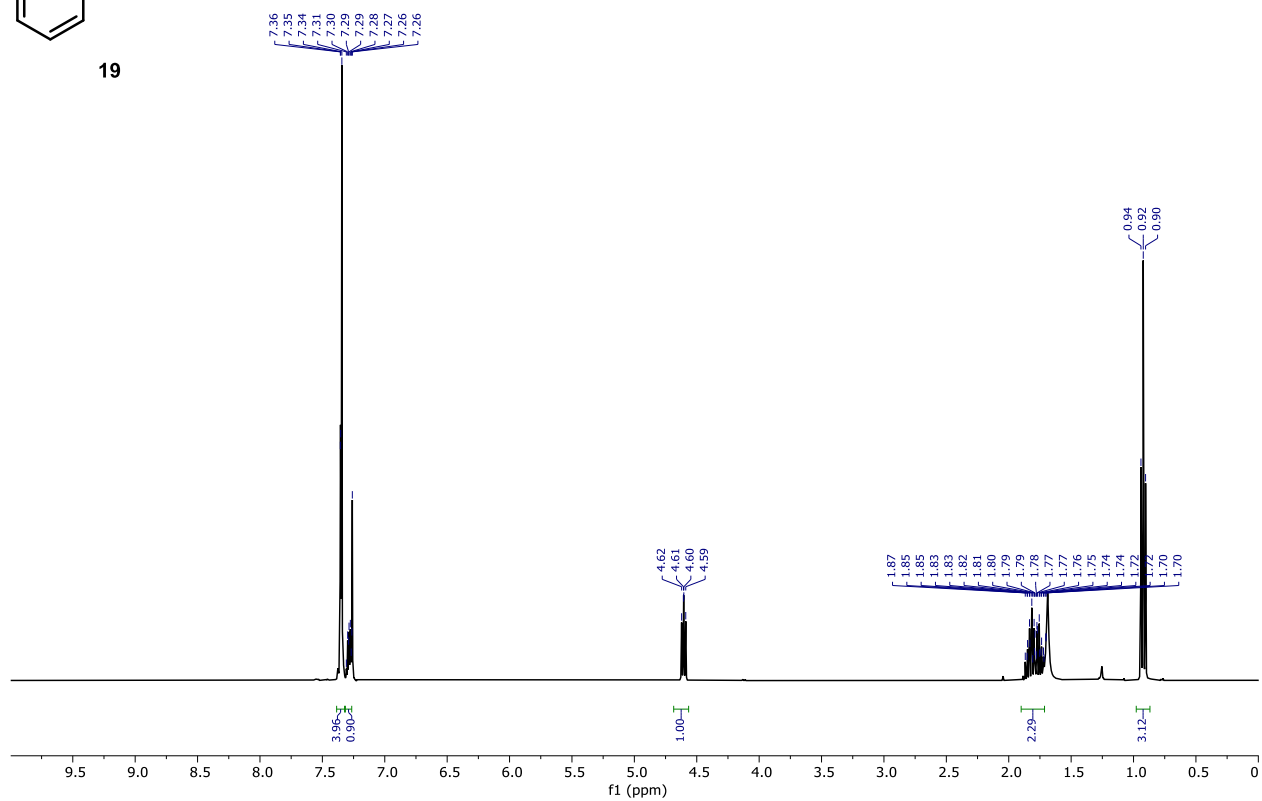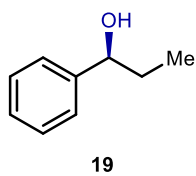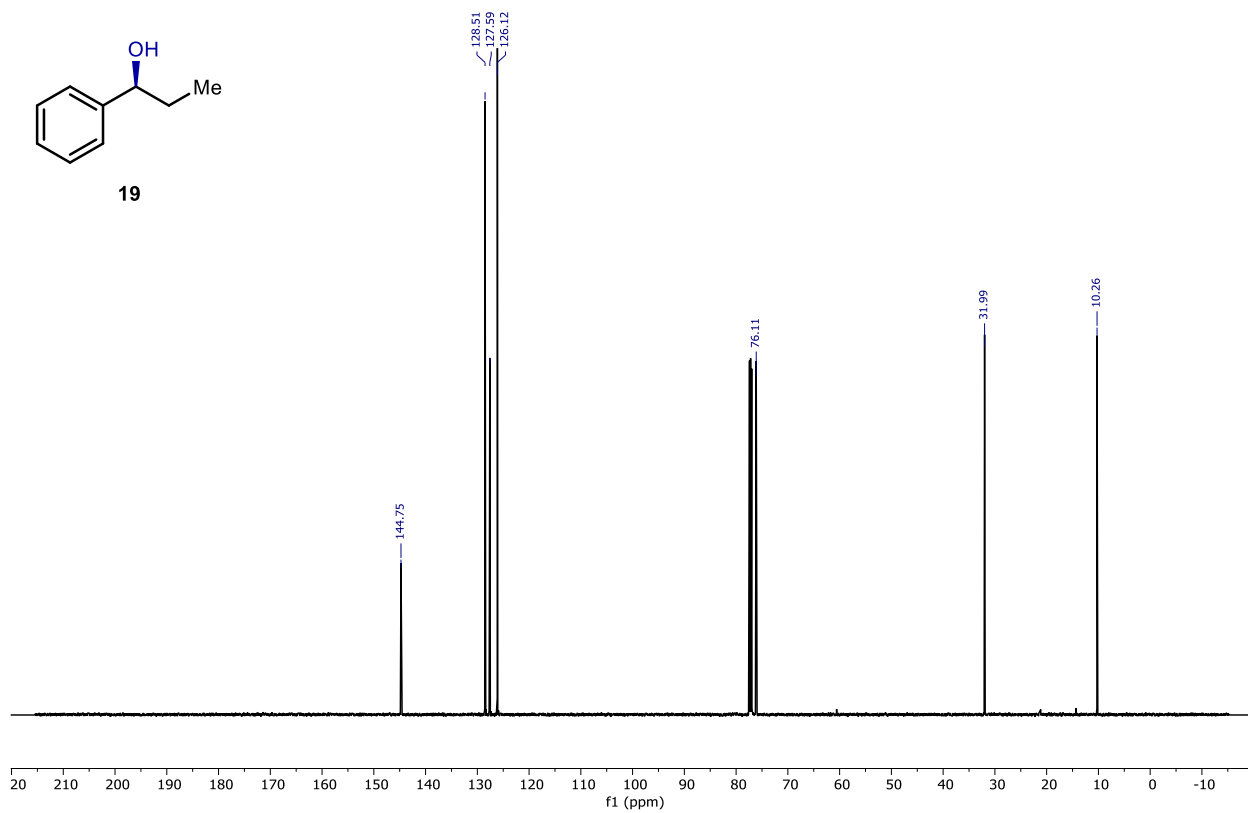

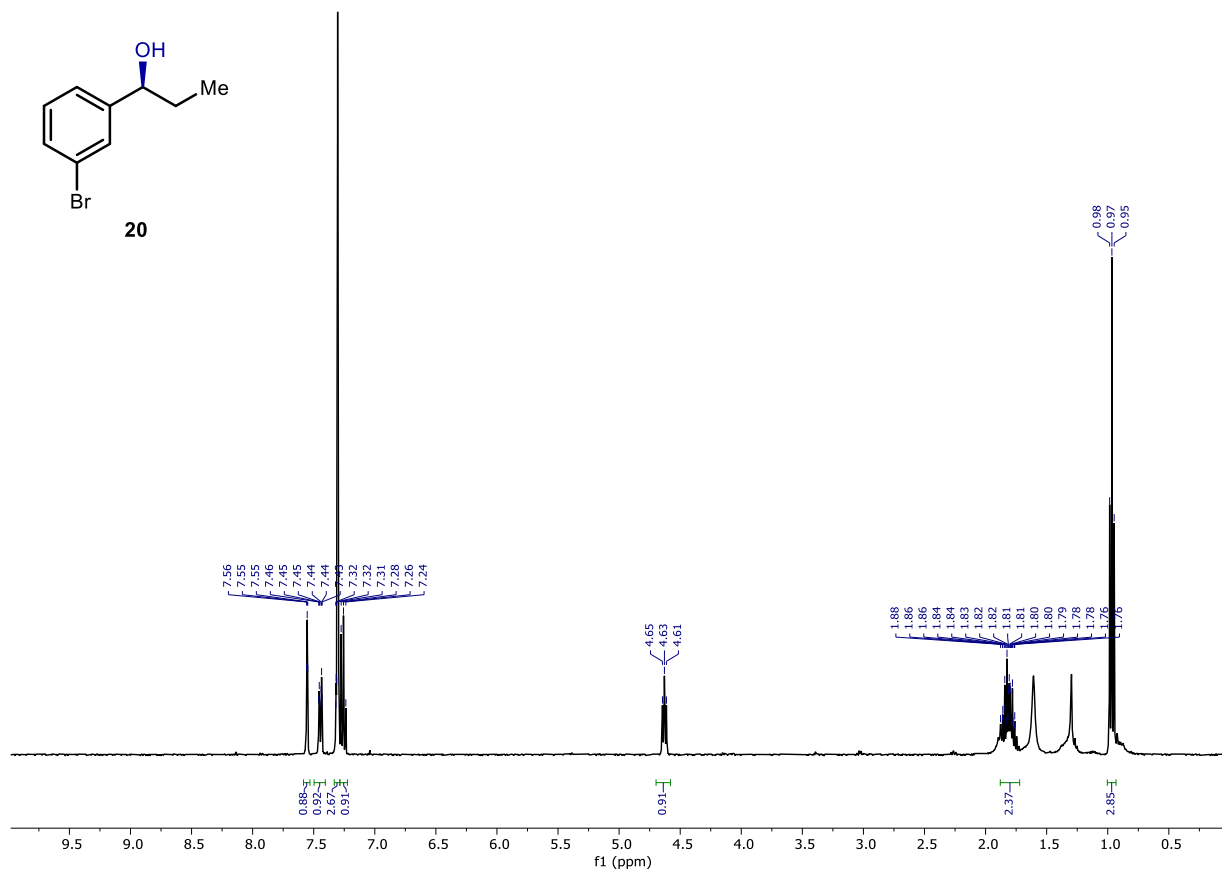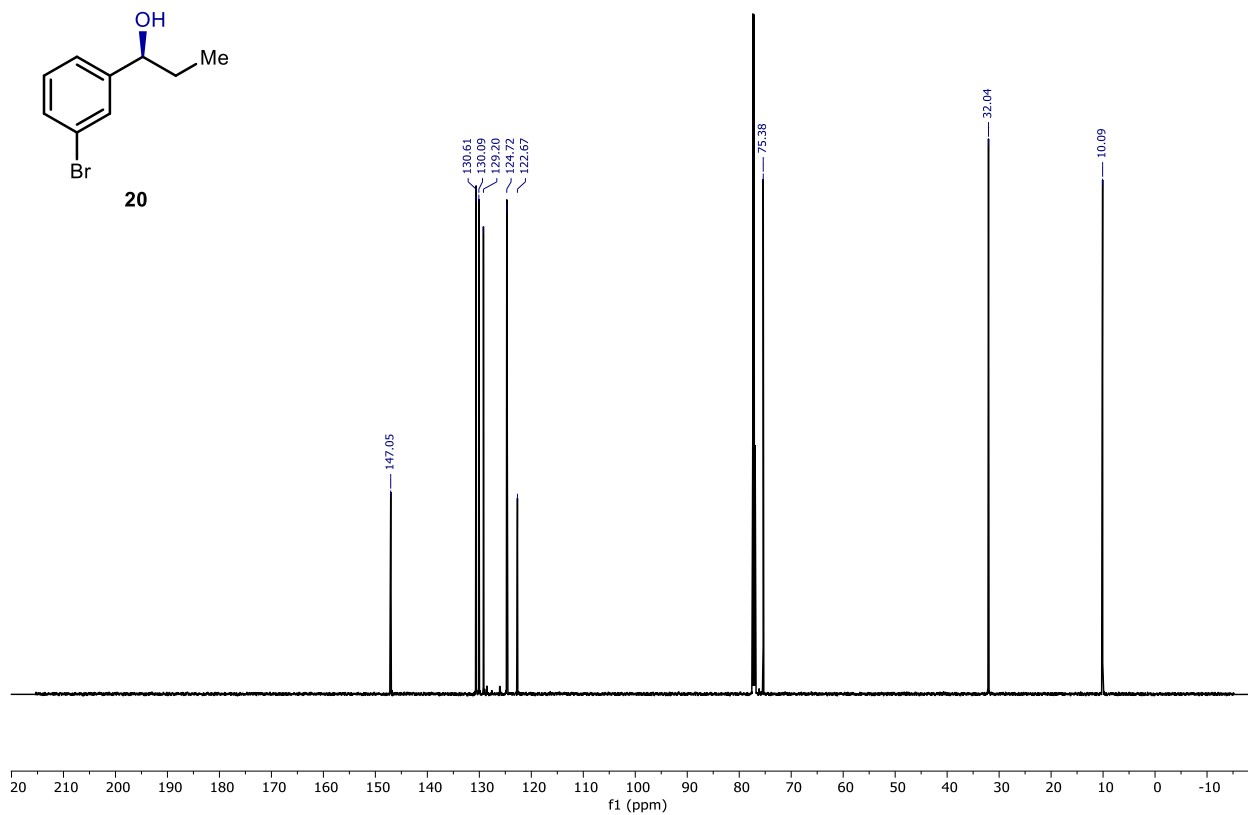

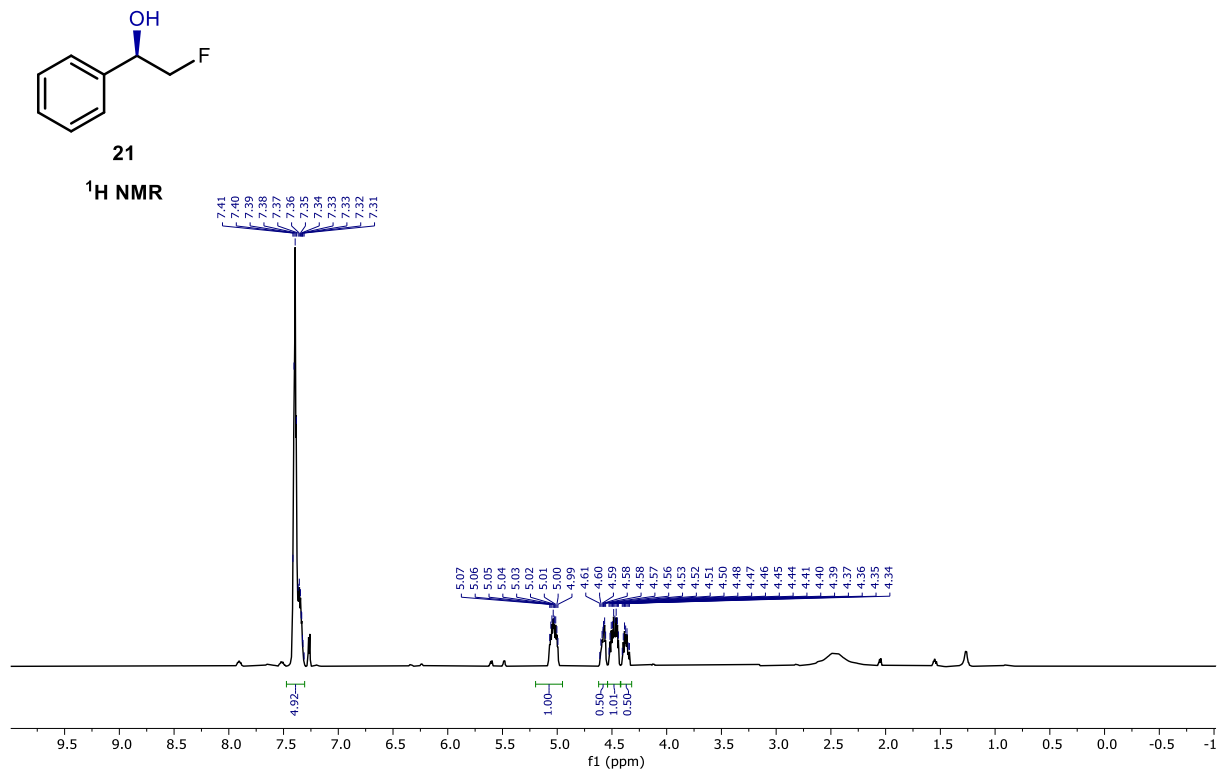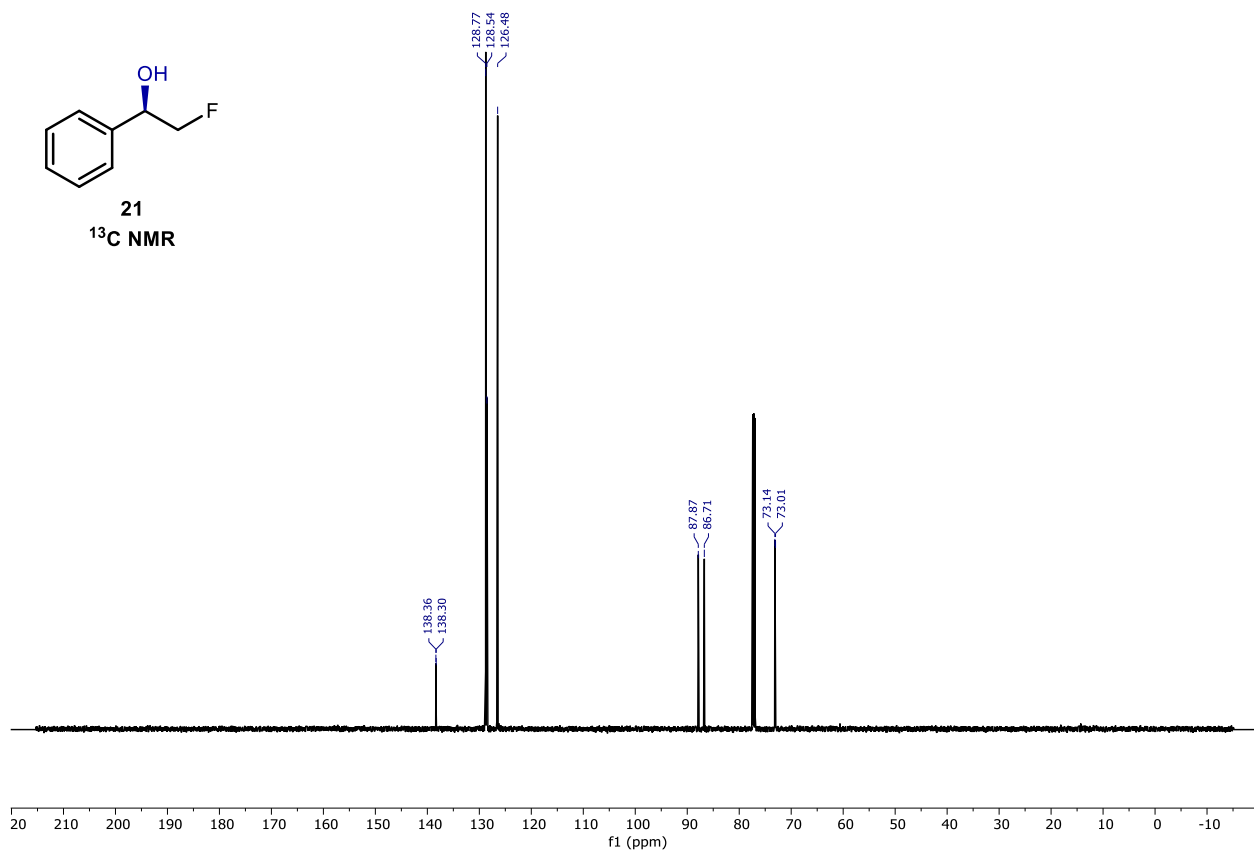

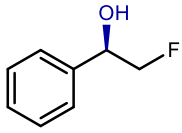

21  
<sup>19</sup>F NMR

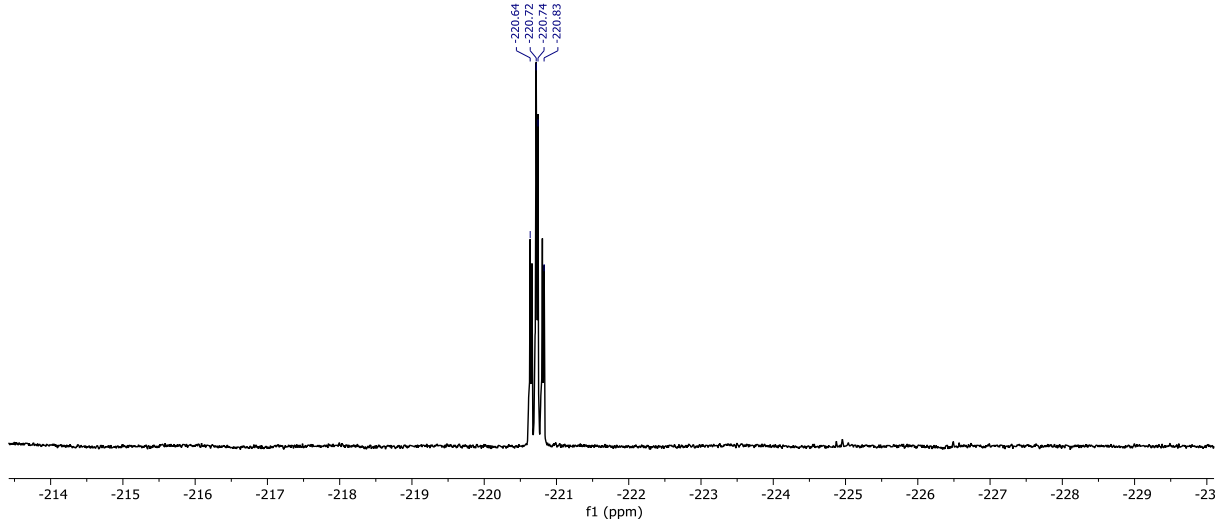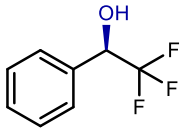

22  
<sup>1</sup>H NMR

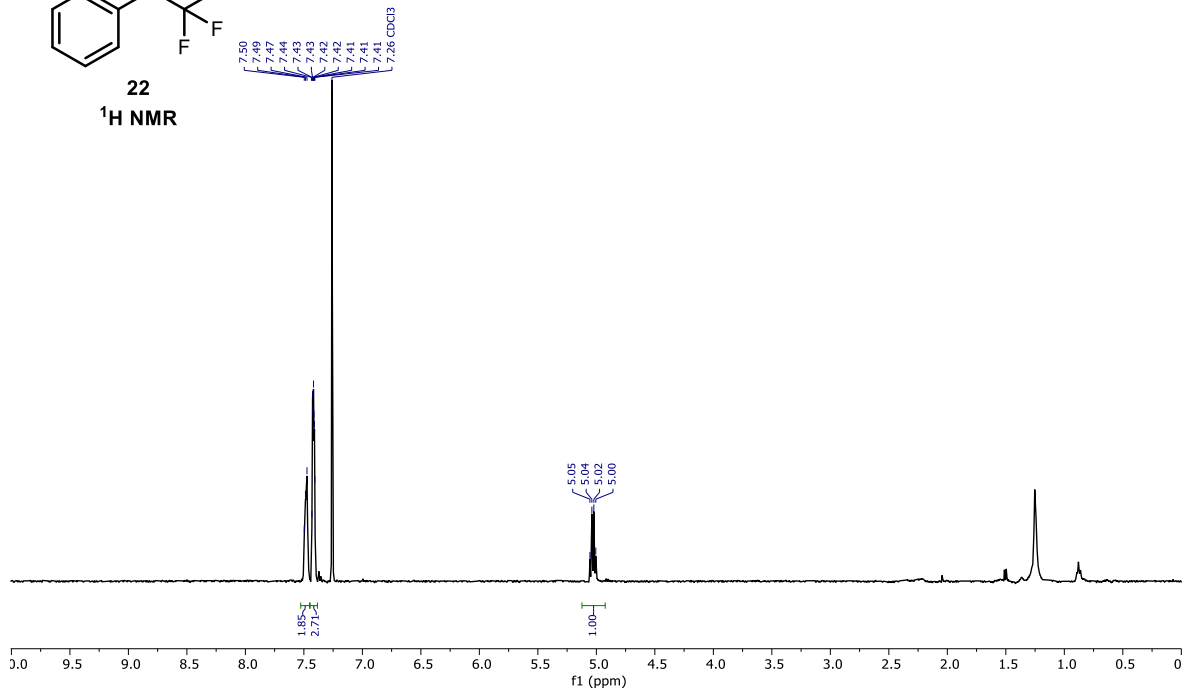

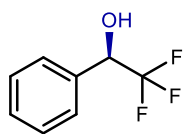

**22**  
**<sup>13</sup>C NMR**

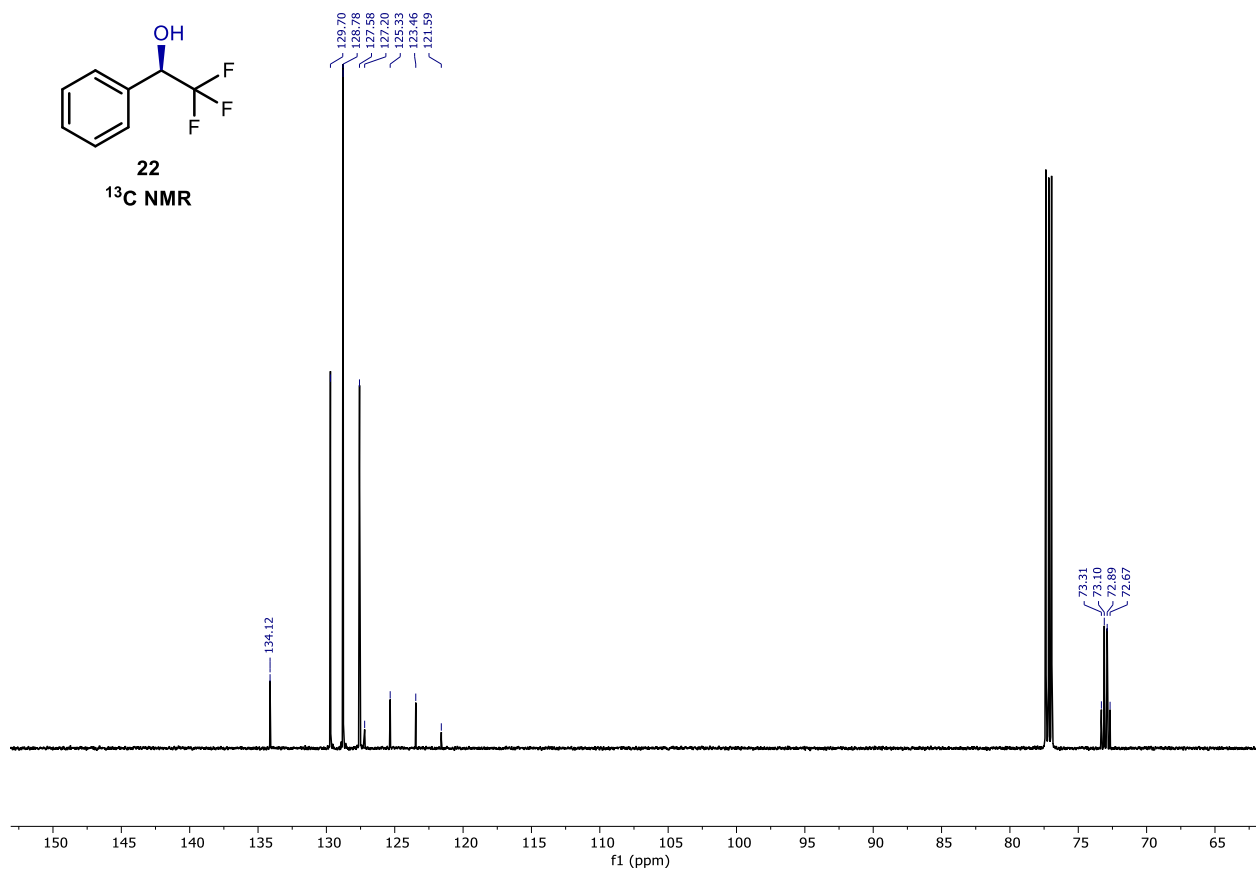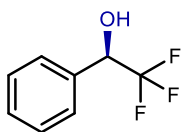

**22**  
**<sup>19</sup>F NMR**

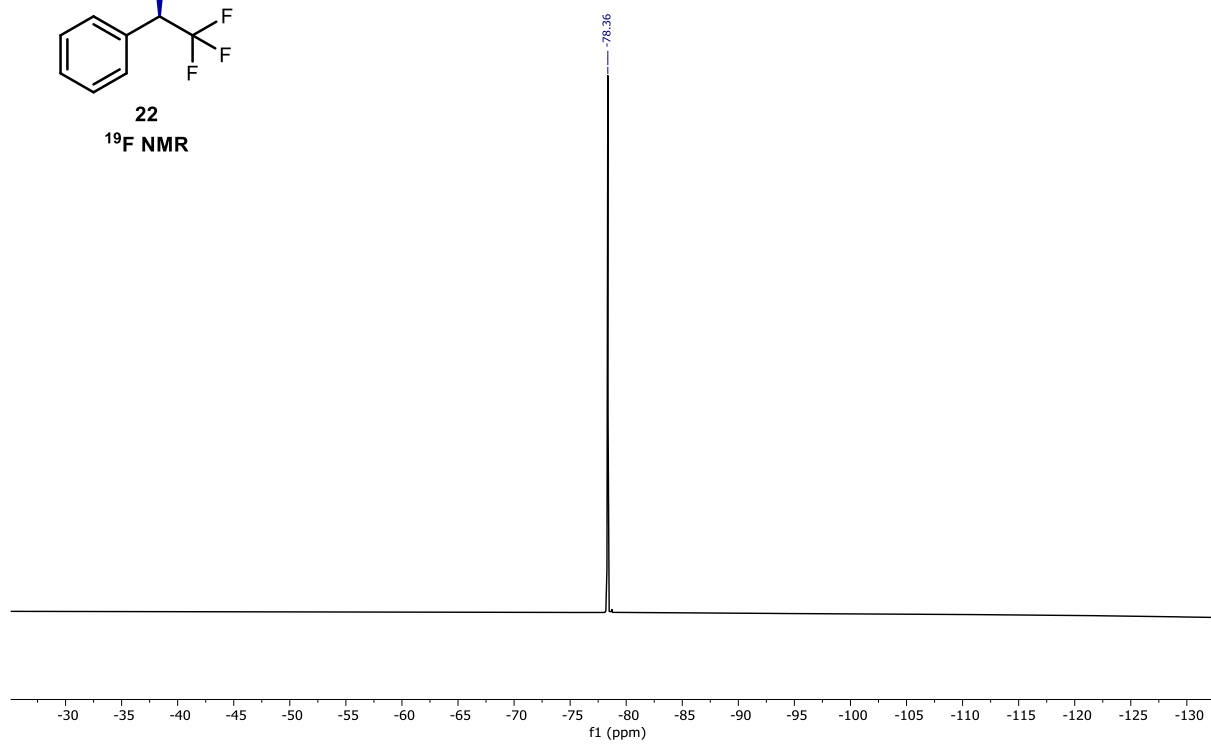

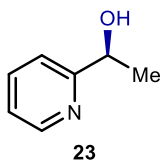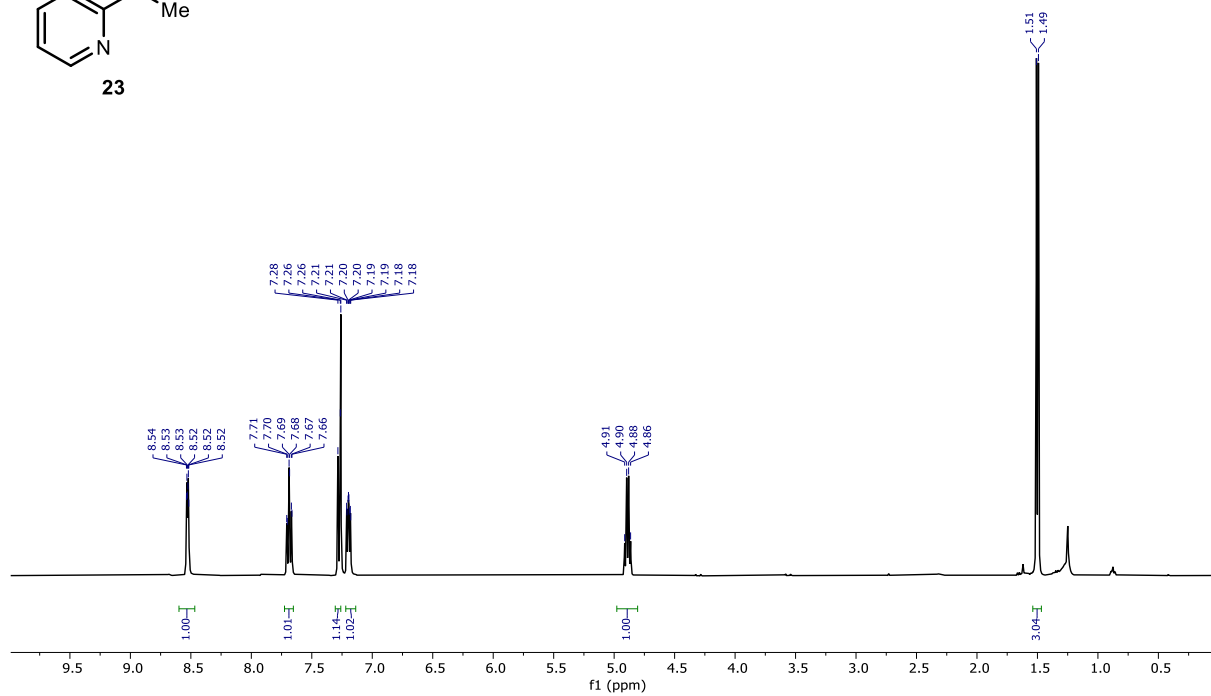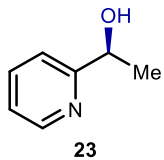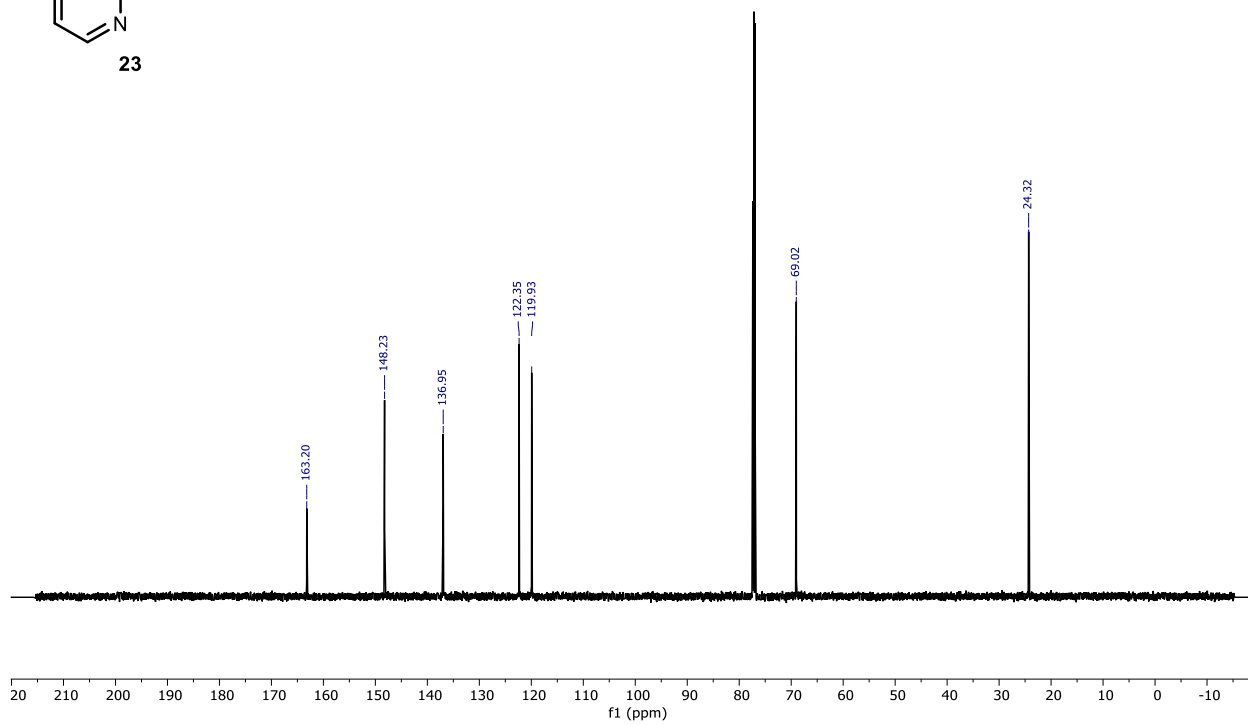



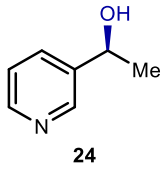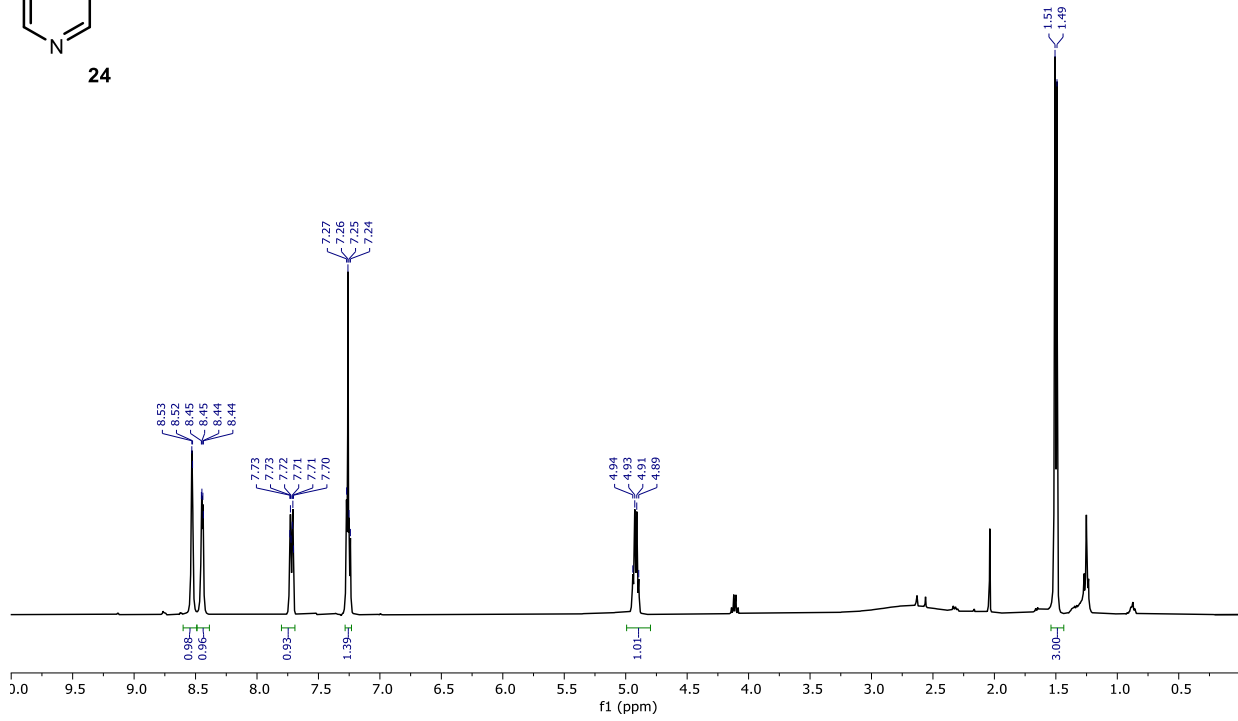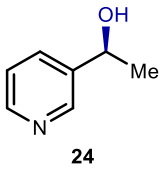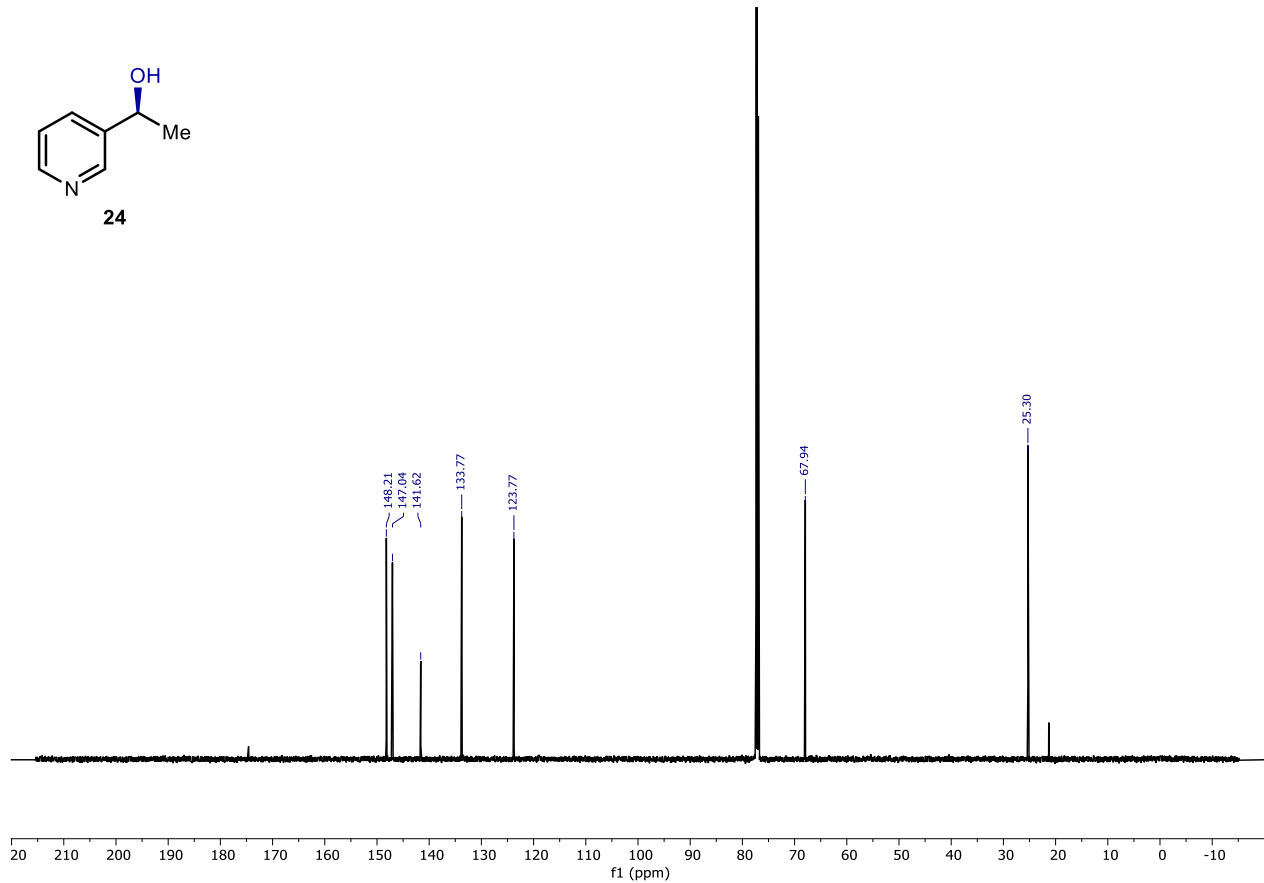

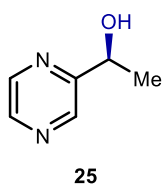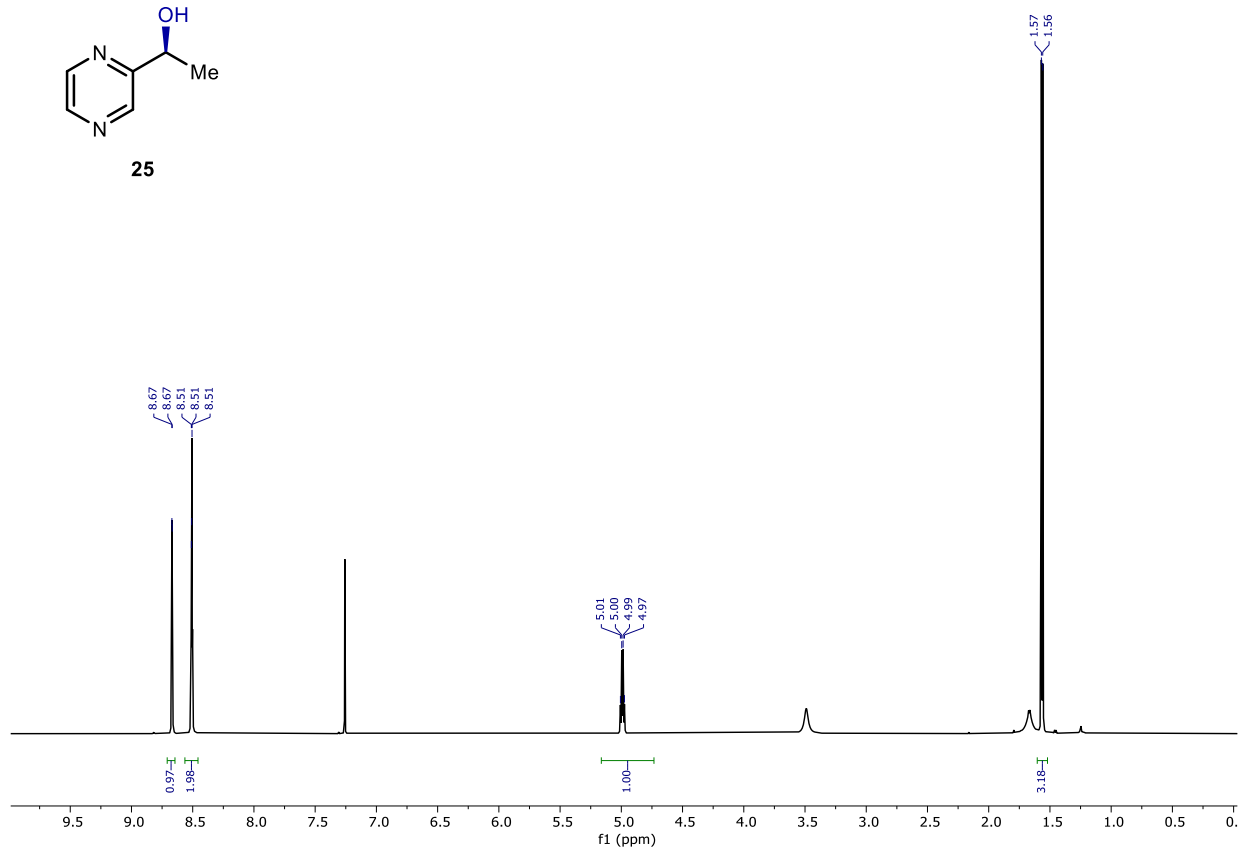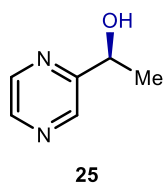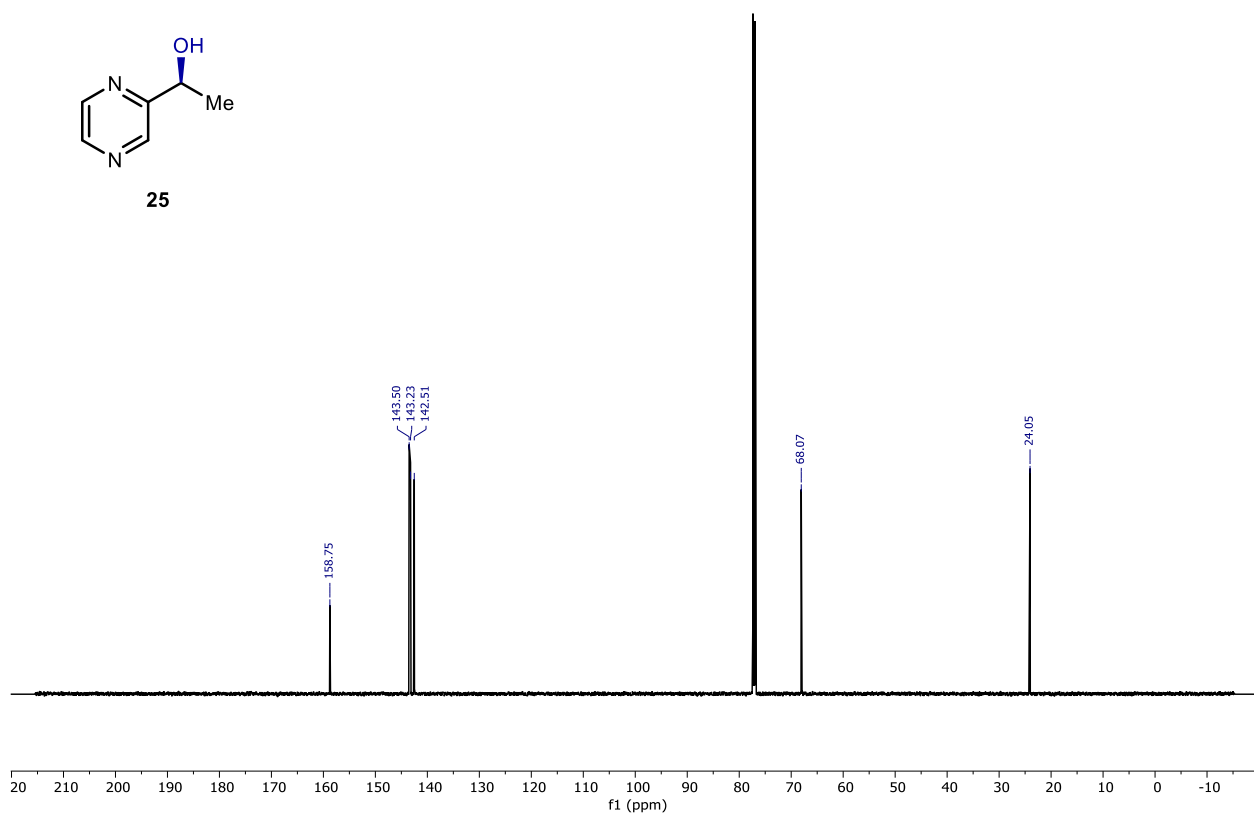

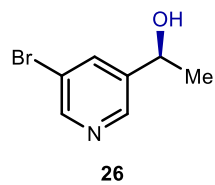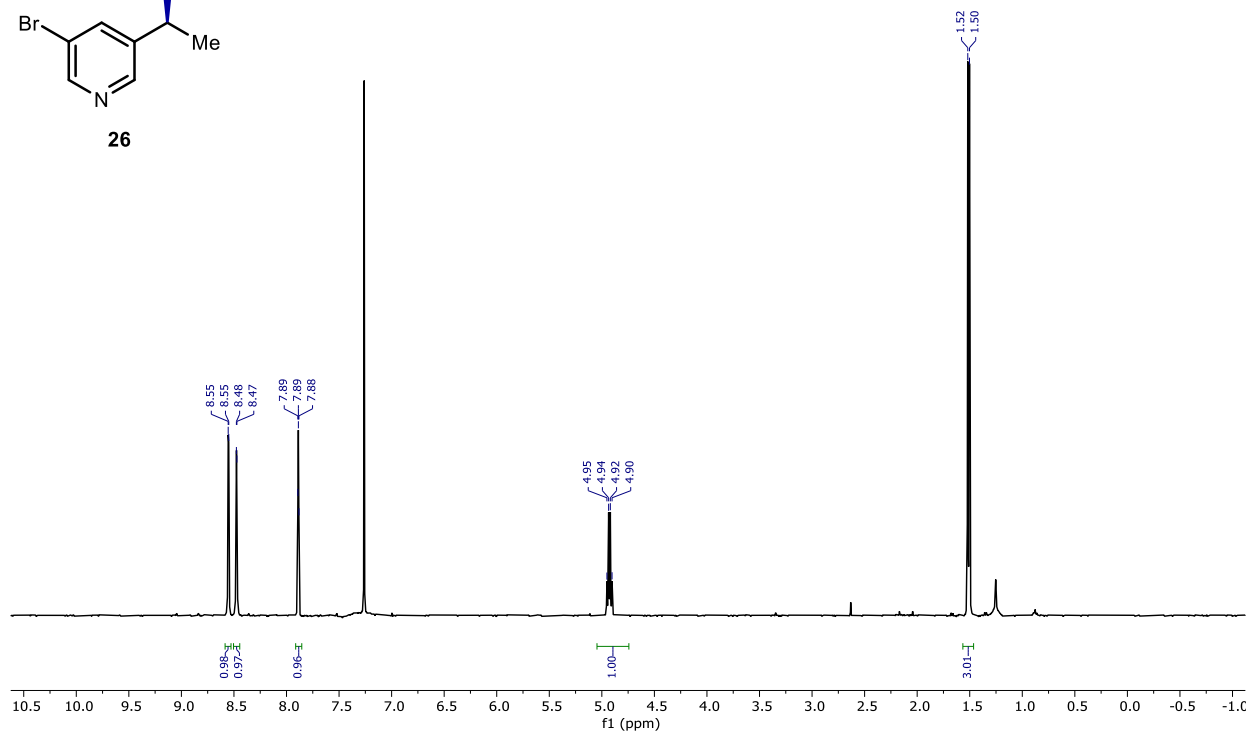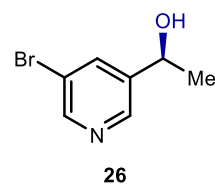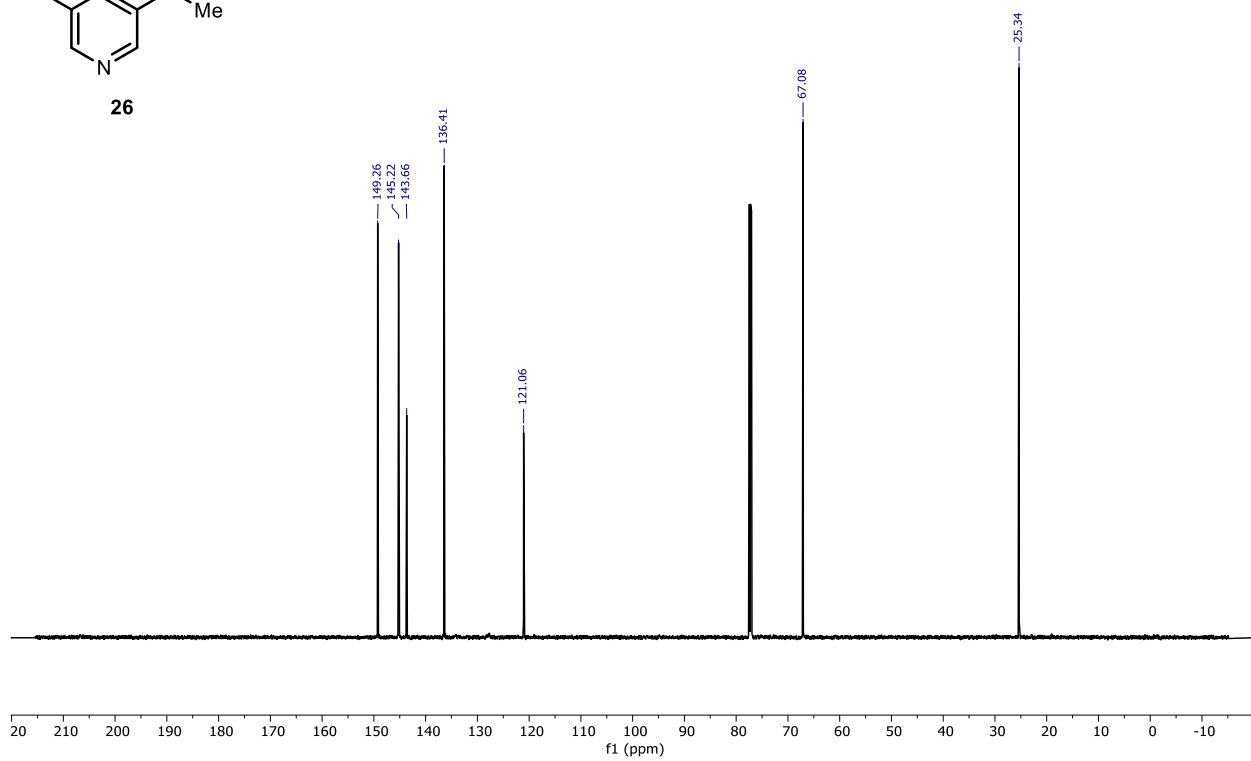

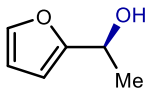

27

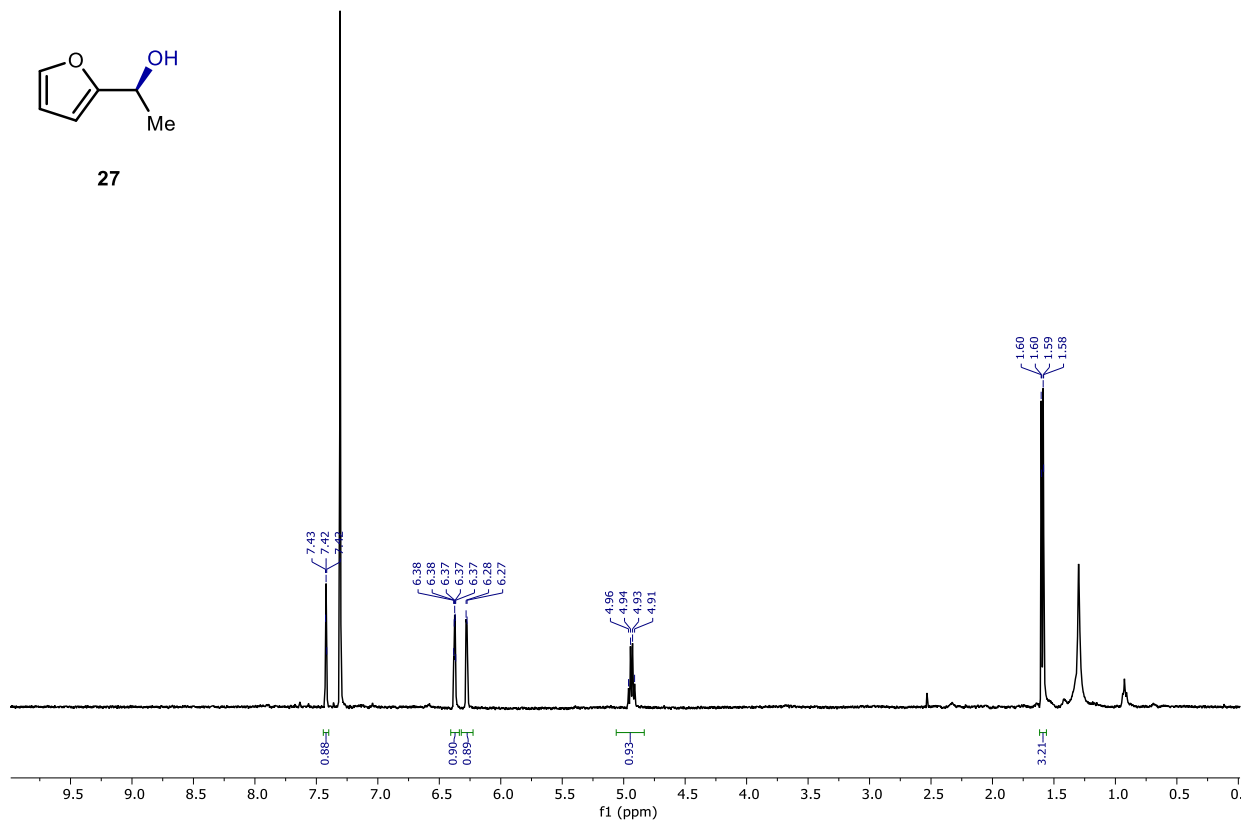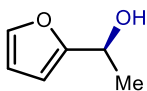

27

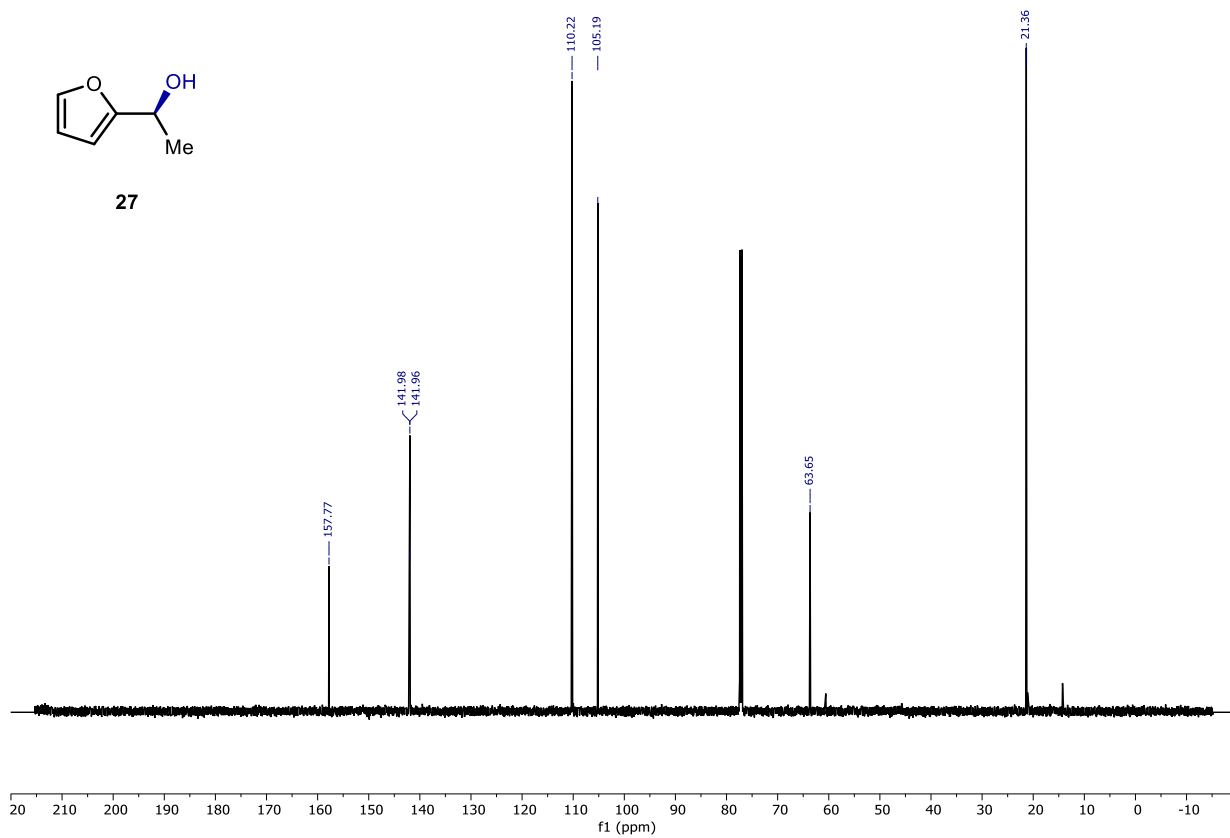

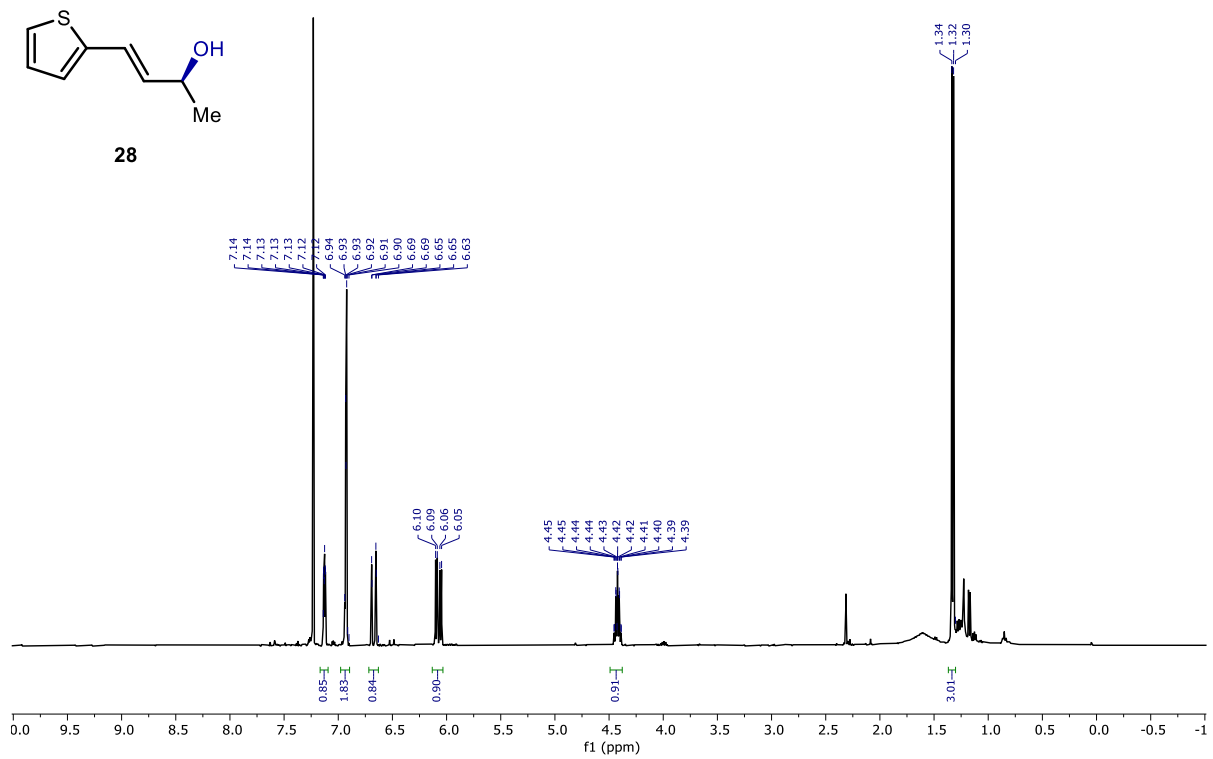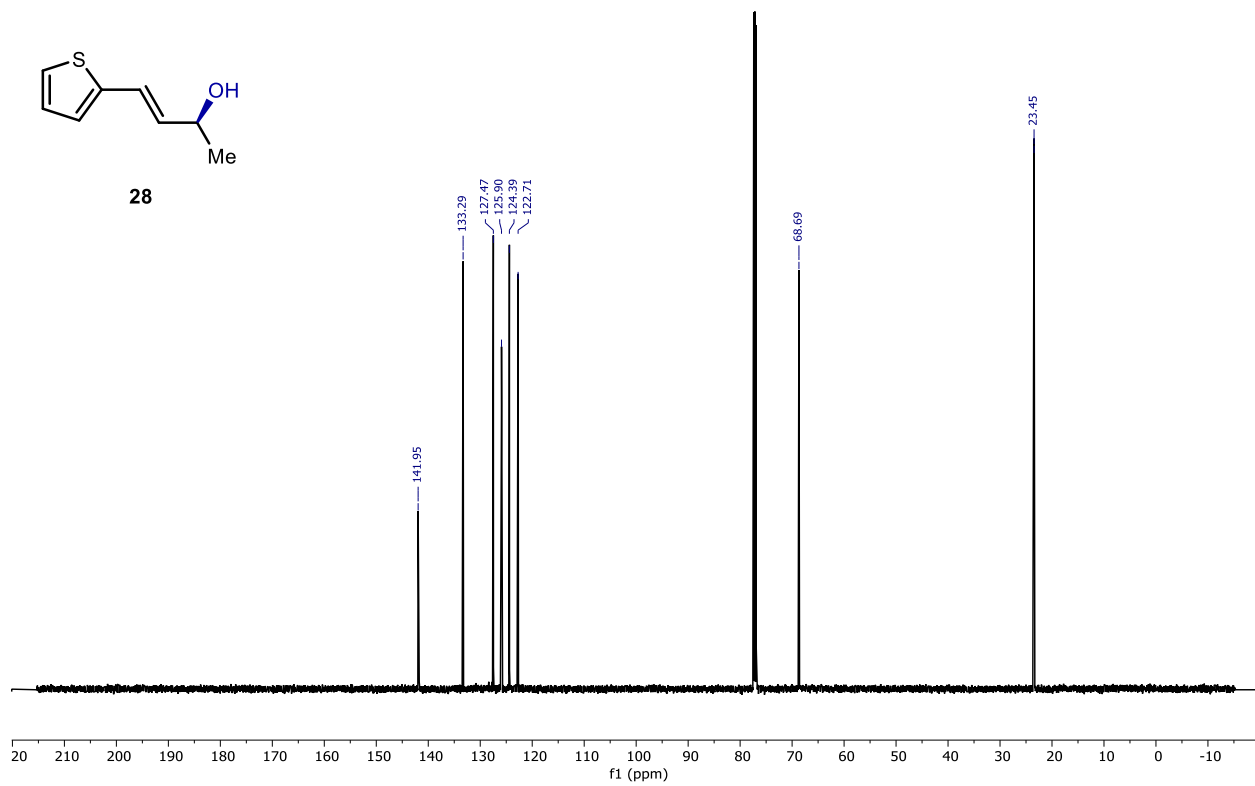

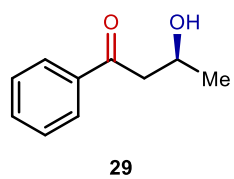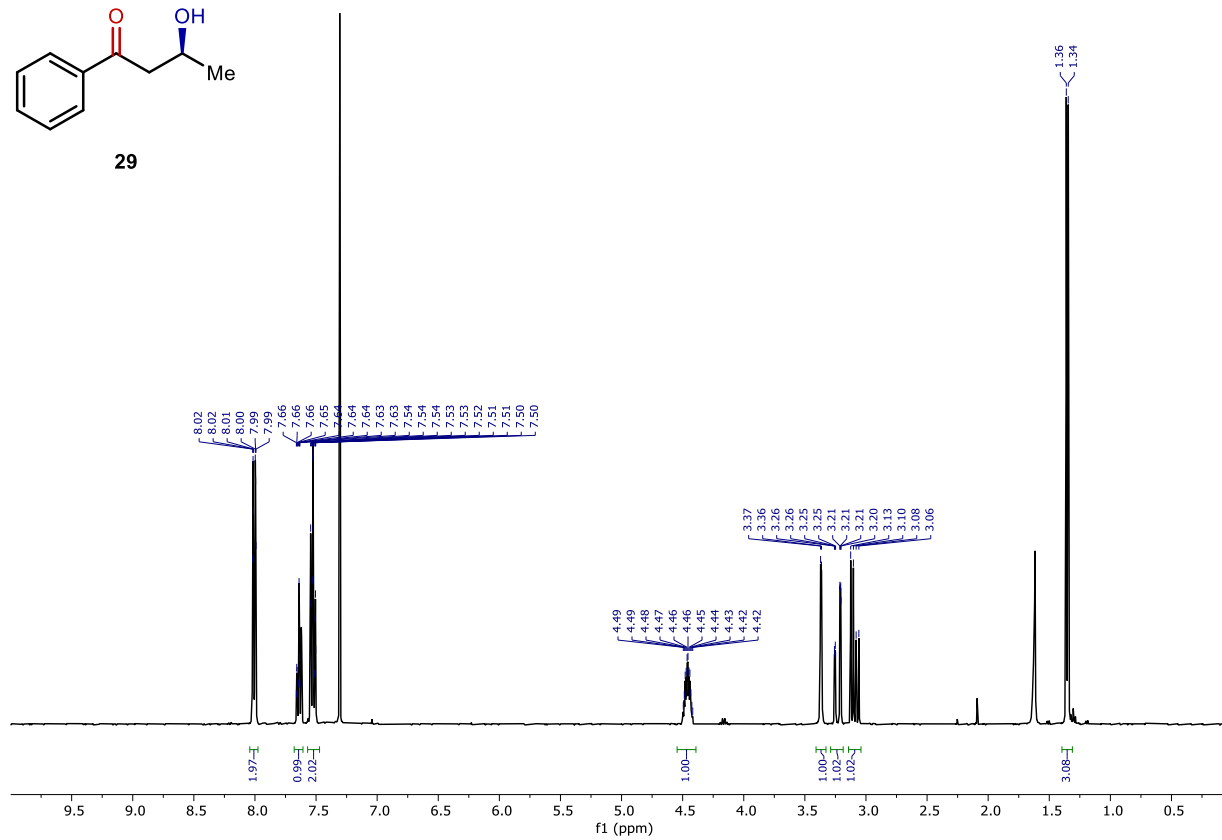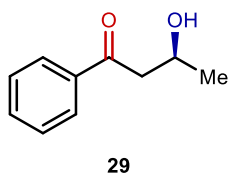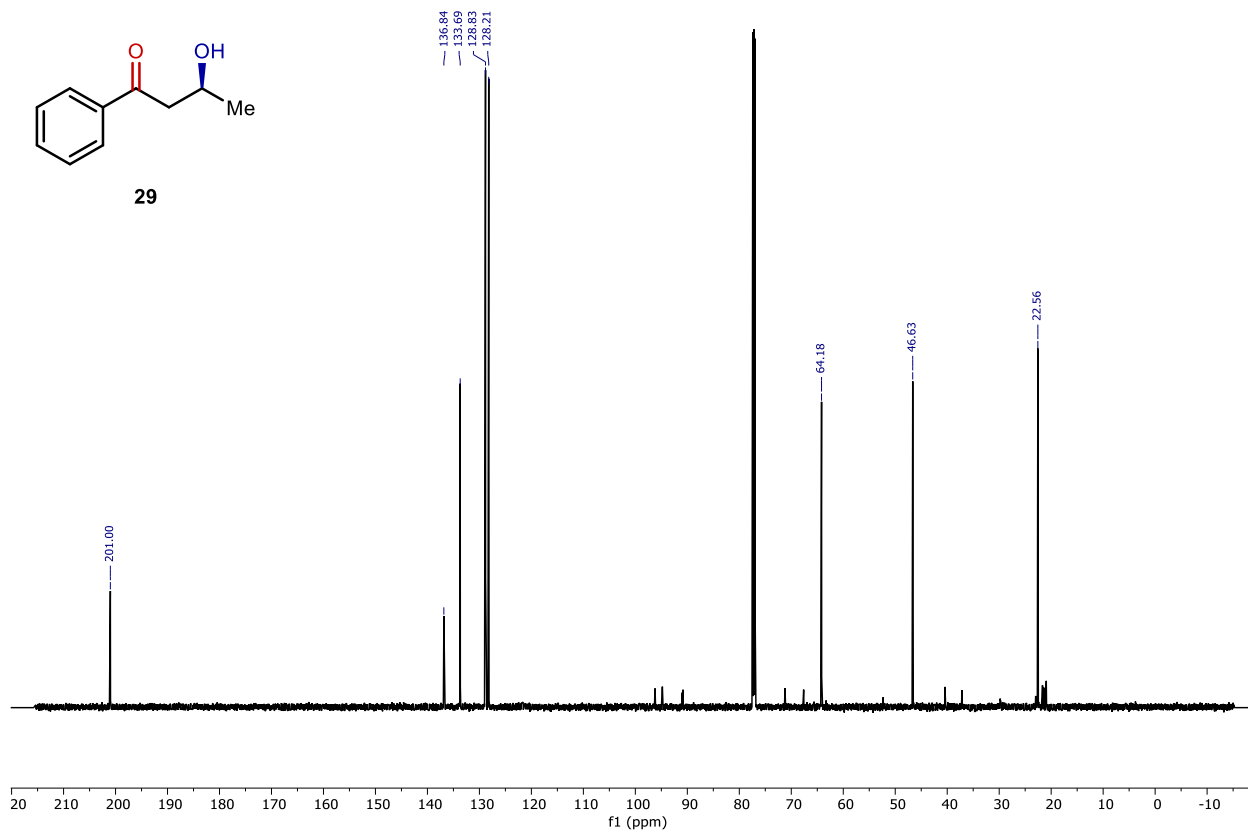

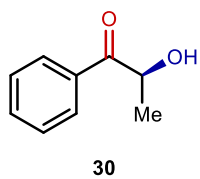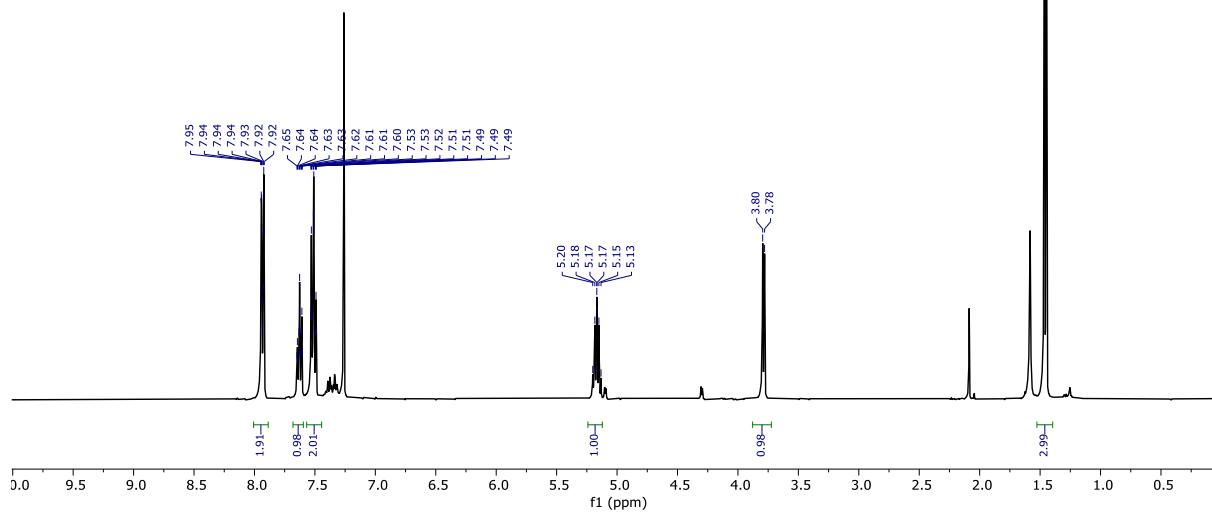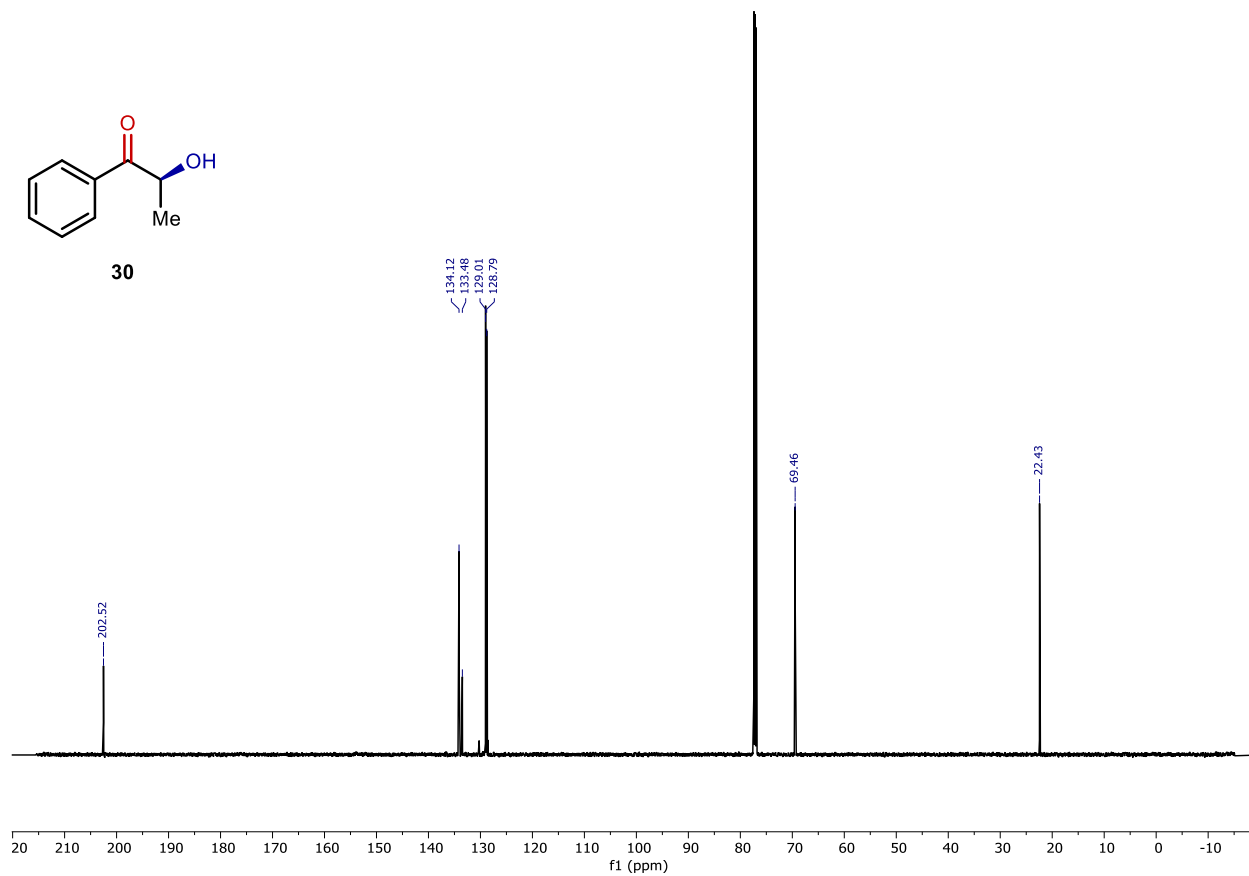

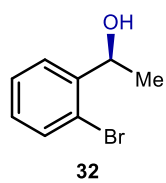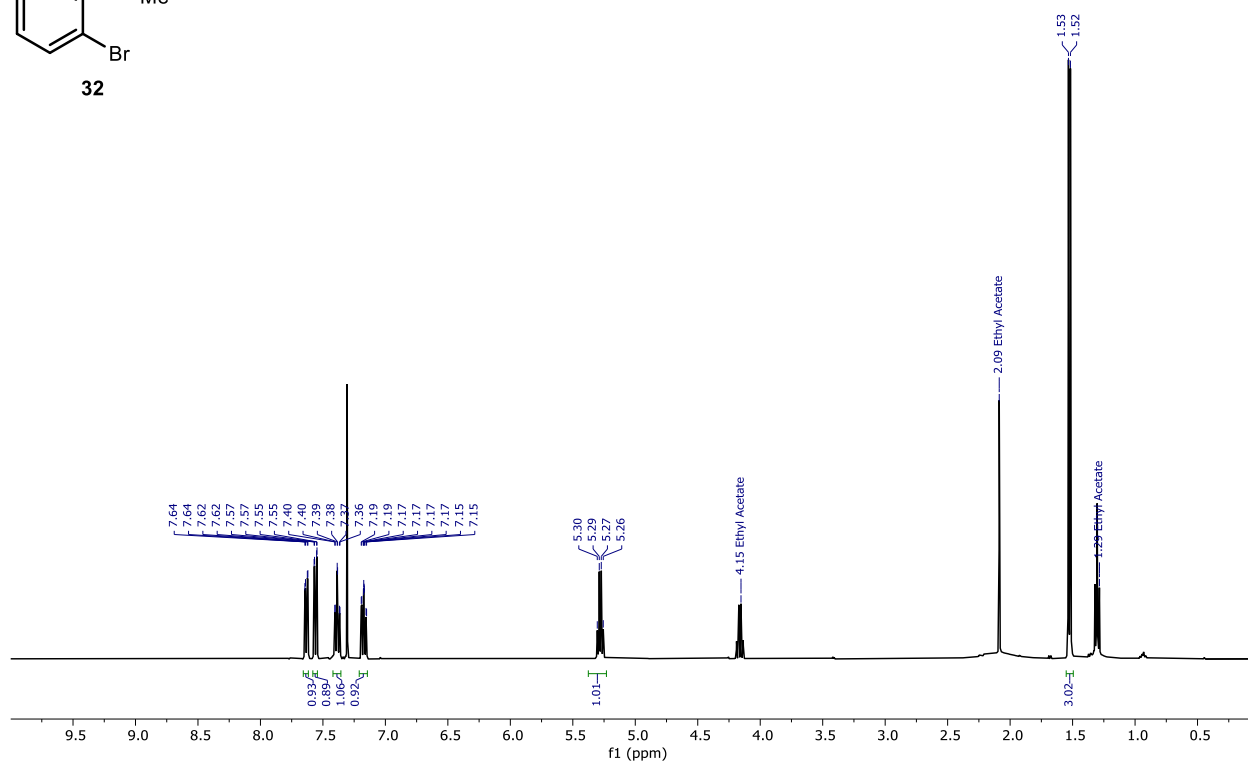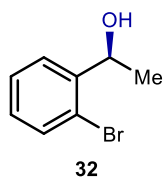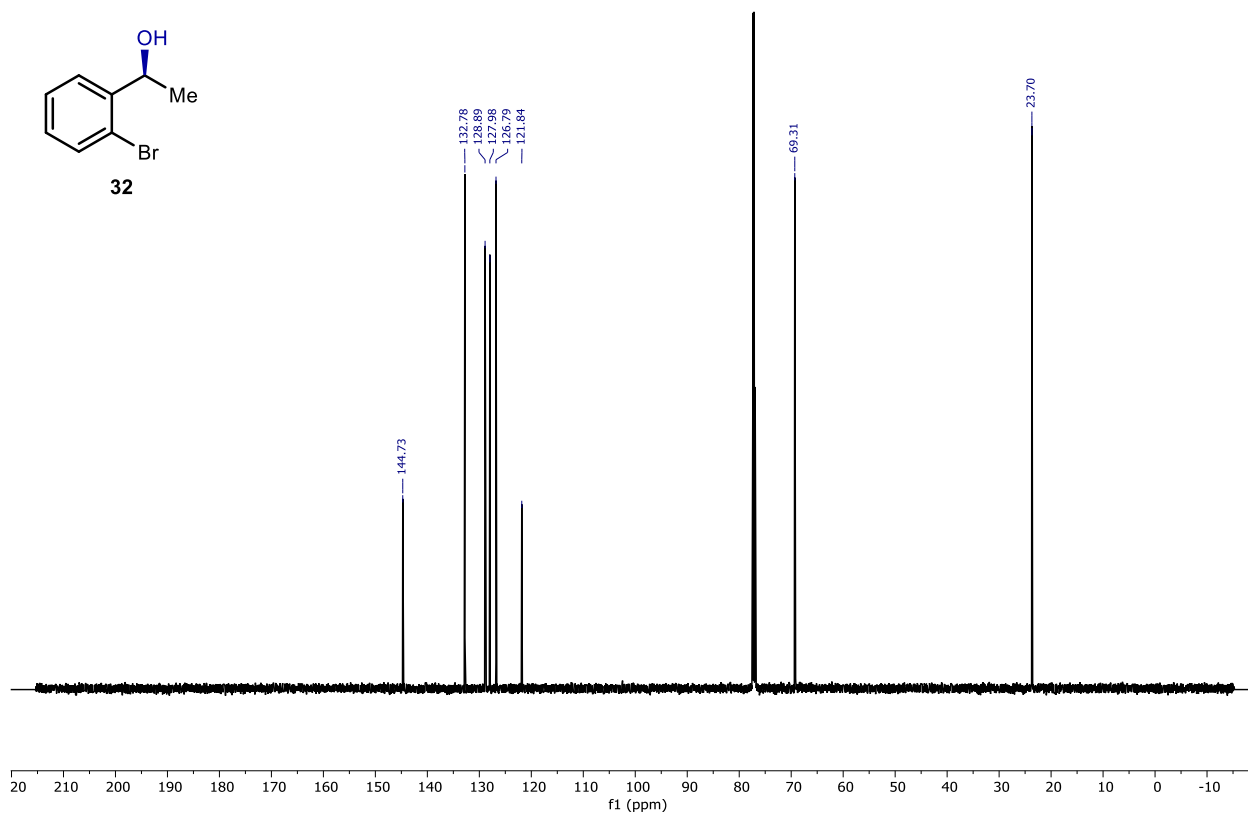



## 9. References

1. Key, H. M., Clark, D. S. & Hartwig, J. F. Generation, characterization, and tunable reactivity of organometallic fragments bound to a protein ligand. *J. Am. Chem. Soc.* **137**, 8261-8268 (2015).
2. Vitale, P. *et al.* Asymmetric chemoenzymatic synthesis of 1,3-diols and 2,4-disubstituted aryloxetanes by using whole cell biocatalysts. *Org. Biomol. Chem.* **14**, 11438-11445 (2016).
3. Kang, S., Han, J., Lee, E. S., Choi, E. B. & Lee, H.-K. Enantioselective synthesis of cyclic sulfamidates by using chiral rhodium-catalyzed asymmetric transfer hydrogenation. *Org. Lett.* **12**, 4184-4187 (2010).
4. Yu, J. *et al.* Iridium-catalyzed asymmetric hydrogenation of ketones with accessible and modular ferrocene-based amino-phosphine acid (f-ampha) ligands. *Org. Lett.* **19**, 690-693 (2017).
5. Kenso, S., Yuji, H. & Shuichi, S. Catalytic asymmetric synthesis of optically active secondary alcohols deuterated on the secondary carbon by the enantioselective alkylation of aldehydes. *Bull. Chem. Soc. Jpn.* **65**, 1734-1735 (1992).
6. Rowbotham, J. S., Ramirez, M. A., Lenz, O., Reeve, H. A. & Vincent, K. A. Bringing biocatalytic deuteration into the toolbox of asymmetric isotopic labelling techniques. *Nat. Commun.* **11**, 1454 (2020).
7. Chen, X. & Lu, Z. Iminophenyl oxazolinyphenylamine for enantioselective cobalt-catalyzed hydrosilylation of aryl ketones. *Org. Lett.* **18**, 4658-4661 (2016).
8. Widegren, M. B., Harkness, G. J., Slawin, A. M. Z., Cordes, D. B. & Clarke, M. L. A highly active manganese catalyst for enantioselective ketone and ester hydrogenation. *Angew. Chem. Int. Ed.* **56**, 5825-5828 (2017).
9. Sappino, C. *et al.* New chiral amino alcohol ligands for catalytic enantioselective addition of diethylzincs to aldehydes. *Org. Biomol. Chem.* **16**, 1860-1870 (2018).
10. Fuglseth, E., Sundby, E., Bruheim, P. & Hoff, B. H. Asymmetric reduction using (r)-mecbs and determination of absolute configuration of para-substituted 2-fluoroarylethanol. *Tetrahedron: Asymmetry* **19**, 1941-1946 (2008).
11. Huang, H., Zong, H., Bian, G. & Song, L. Chemo- and enantioselective addition and  $\beta$ -hydrogen transfer reduction of carbonyl compounds with diethylzinc reagent in one pot catalyzed by a single chiral organometallic catalyst. *J. Org. Chem.* **80**, 12614-12619 (2015).
12. Lebedev, Y. *et al.* Asymmetric hydroboration of heteroaryl ketones by aluminum catalysis. *J. Am. Chem. Soc.* **141**, 19415-19423 (2019).
13. Dong, X.-Y. *et al.* A general asymmetric copper-catalysed sonogashira c(sp<sup>3</sup>)-c(sp) coupling. *Nat. Chem.* **11**, 1158-1166 (2019).
14. Stepanenko, V. *et al.* Chiral spiroaminoborate ester as a highly enantioselective and efficient catalyst for the borane reduction of furyl, thiophene, chroman, and thiochroman-containing ketones. *Tetrahedron: Asymmetry* **20**, 2659-2665 (2009).

15. Zhu, L., Kitanosono, T., Xu, P. & Kobayashi, S. A cu(ii)-based strategy for catalytic enantioselective  $\beta$ -borylation of  $\alpha,\beta$ -unsaturated acceptors. *Chem. Commun.* **51**, 11685-11688 (2015).
16. Li, C.-T., Liu, H., Yao, Y. & Lu, C.-D. Rearrangement of n-tert-butanesulfinyl enamines for synthesis of enantioenriched  $\alpha$ -hydroxy ketone derivatives. *Org. Lett.* **21**, 8383-8388 (2019).
17. Schrödinger release 2020-2: Protein preparation wizard; epik, schrödinger, llc, new york, NY, 2020; impact, schrödinger, llc, new york, NY, 2020; prime, schrödinger, llc, new york, NY. (2020).
18. Madhavi Sastry, G., Adzhigirey, M., Day, T., Annabhimoju, R. & Sherman, W. Protein and ligand preparation: Parameters, protocols, and influence on virtual screening enrichments. *J. Comput. Aided Mol. Des.* **27**, 221-234 (2013).
19. Banks, J. L. *et al.* Integrated modeling program, applied chemical theory (impact). *J. Comput. Chem.* **26**, 1752-1780 (2005).
20. Schrödinger release 2020-2: Ligprep, schrödinger, llc, new york, NY. (2020).
21. Friesner, R. A. *et al.* Glide: A new approach for rapid, accurate docking and scoring. 1. Method and assessment of docking accuracy. *J. Med. Chem.* **47**, 1739-1749 (2004).
22. Schrödinger release 2020-2: Desmond molecular dynamics system, d. E. Shaw research, new york, NY, 2020. Maestro-desmond interoperability tools, schrödinger, new york, NY. (2020).
23. in *Proceedings of the 2006 ACM/IEEE conference on Supercomputing.* (Association for Computing Machinery).
24. Jorgensen, W. L., Chandrasekhar, J., Madura, J. D., Impey, R. W. & Klein, M. L. Comparison of simple potential functions for simulating liquid water. *J. Chem. Phys.* **79**, 926-935 (1983).
25. Berendsen, H. J. C., Postma, J. P. M., Gunsteren, W. F. v., DiNola, A. & Haak, J. R. Molecular dynamics with coupling to an external bath. *J. Chem. Phys.* **81**, 3684-3690 (1984).
26. Schrödinger release 2020-2: Qsite, schrödinger, llc, new york, NY. (2020).
27. Murphy, R. B., Philipp, D. M. & Friesner, R. A. A mixed quantum mechanics/molecular mechanics (qm/mm) method for large-scale modeling of chemistry in protein environments. *J. Comput. Chem.* **21**, 1442-1457 (2000).
28. Philipp, D. M. & Friesner, R. A. Mixed ab initio qm/mm modeling using frozen orbitals and tests with alanine dipeptide and tetrapeptide. *J. Comput. Chem.* **20**, 1468-1494 (1999).
29. Becke, A. D. Density-functional thermochemistry. Iii. The role of exact exchange. *J. Chem. Phys.* **98**, 5648-5652 (1993).
30. Stephens, P. J., Devlin, F. J., Chabalowski, C. F. & Frisch, M. J. Ab initio calculation of vibrational absorption and circular dichroism spectra using density functional force fields. *The Journal of Physical Chemistry* **98**, 11623-11627 (1994).
31. Wadt, W. R. & Hay, P. J. Ab initio effective core potentials for molecular calculations. Potentials for main group elements na to bi. *J. Chem. Phys.* **82**, 284-298 (1985).

32. Hay, P. J. & Wadt, W. R. Ab initio effective core potentials for molecular calculations. Potentials for the transition metal atoms sc to hg. *J. Chem. Phys.* **82**, 270-283 (1985).
33. Hariharan, P. C. & Pople, J. A. Accuracy of ah n equilibrium geometries by single determinant molecular orbital theory. *Mol. Phys.* **27**, 209-214 (1974).
